# Supplementary material for: FDF-DB: A Database of Traditional Fermented Dairy Foods and Their Associated Microbiota
Source: MDPI journal article supplement (doi:10.3390/nu14214581), 2022-11-01
Supplement: s1 [file s1]

**Table S2.** Distribution of the identified traditional dairy products, along with their characteristics and related articles, within Eastern Europe, Balcanic and Russian countries

| Country                              | Total dairy products | Geographical indication label | Cow milk* | Sheep milk* | Goat milk* | Other milk* | Fresh* | Short ripened* | Ripened* | Articles in PubMed or Scopus | Articles describing microbiota composition |
|--------------------------------------|----------------------|-------------------------------|-----------|-------------|------------|-------------|--------|----------------|----------|------------------------------|--------------------------------------------|
| Albania                              | 6                    | n.a.                          | 1         | 3           | 3          | 0           | 3      | 3              | 1        | 2                            | 0                                          |
| Macedonia, Serbia, Bosnia-Erzegovina | 10                   | n.a.                          | 8         | 6           | 6          | 1           | 1      | 6              | 1        | 18                           | 1                                          |
| Bulgaria                             | 6                    | 0                             | 4         | 4           | 3          | 1           | 3      | 1              | 2        | 44                           | 1                                          |
| Croatia                              | 1                    | 0                             | 0         | 1           | 0          | 0           | 0      | 1              | 0        | 0                            | 0                                          |
| Cyprus                               | 4                    | 1                             | 1         | 2           | 3          | 0           | 2      | 3              | 0        | 98                           | 2                                          |
| Czech Republic                       | 5                    | 3                             | 4         | 1           | 0          | 0           | 0      | 5              | 0        | 0                            | 0                                          |
| Estonia                              | 1                    | 0                             | 1         | 0           | 0          | 0           | 0      | 1              | 0        | 0                            | 0                                          |
| Greece                               | 31                   | 22                            | 5         | 26          | 25         | 0           | 13     | 20             | 2        | 836                          | 20                                         |
| Hungary                              | 11                   | 0                             | 5         | 2           | 2          | 0           | 6      | 5              | 0        | 3                            | 0                                          |
| Kosovo                               | 1                    | n.a.                          | 1         | 1           | 0          | 0           | 0      | 1              | 0        | 0                            | 0                                          |
| Latvia                               | 1                    | 0                             | n.d.      | n.d.        | n.d.       | n.d.        | 1      | 0              | 0        | 0                            | 0                                          |
| Lithuania                            | 4                    | 3                             | 2         | 0           | 0          | 0           | 2      | 1              | 1        | 1                            | 0                                          |
| Malta                                | 1                    | 0                             | 0         | 1           | 0          | 0           | 1      | 1              | 0        | 0                            | 0                                          |
| Moldova                              | 4                    | n.a.                          | 1         | 4           | 1          | 0           | 3      | 2              | 0        | 9                            | 0                                          |
| Poland                               | 7                    | 5                             | 2         | 3           | 0          | 0           | 2      | 0              | 0        | 2                            | 0                                          |
| Romania                              | 9                    | 1                             | 5         | 5           | 2          | 0           | 5      | 2              | 2        | 35                           | 0                                          |

|                               |            |           |           |           |           |          |           |           |           |             |           |
|-------------------------------|------------|-----------|-----------|-----------|-----------|----------|-----------|-----------|-----------|-------------|-----------|
| Russia, Ukraine, Belarus      | 18         | n.a.      | 9         | 2         | 2         | 0        | 11        | 2         | 0         | 31          | 0         |
| Slovakia                      | 10         | 5         | 5         | 4         | 0         | 0        | 4         | 3         | 0         | 17          | 6         |
| Slovenia                      | 5          | 4         | 4         | 1         | 1         | 0        | 1         | 4         | 0         | 4           | 0         |
| Armenia, Azerbaigian, Georgia | 9          | n.a.      | 5         | 3         | 3         | 4        | 7         | 1         | 1         | 2131        | 44        |
| Turkey, Turkestan             | 39         | n.a.      | 20        | 15        | 14        | 2        | 16        | 9         | 8         | 491         | 5         |
| Kurdistan                     | 1          | n.a.      | n.d.      | n.d.      | n.d.      | n.d.     | 1         | 0         | 0         | 0           | 0         |
| <b>TOTAL</b>                  | <b>183</b> | <b>44</b> | <b>83</b> | <b>84</b> | <b>65</b> | <b>8</b> | <b>82</b> | <b>71</b> | <b>18</b> | <b>3722</b> | <b>79</b> |

\* The sum of the items Cow milk, Sheep milk, Goat milk and Other milk outnumbers the corresponding Total dairy products, since in some cases the same product can be obtained by using different milk sources. The same applies also to Fresh, Short ripened and Ripened items.
