# Supplementary material for: FDF-DB: A Database of Traditional Fermented Dairy Foods and Their Associated Microbiota
Source: Nutrients. 2022 Nov 1;14(21):4581. doi: 10.3390/nu14214581 (PMC9658602; doi:10.3390/nu14214581)
Supplement: Supplementary file 1 [file nutrients-14-04581-s001.zip]

Archive with 4 entries (4 files):
- Table S1_List of dairy products.xlsx
- Table S2.pdf
- Table S3.pdf
- Table S4.pdf
