# Supplementary material for: FDF-DB: A Database of Traditional Fermented Dairy Foods and Their Associated Microbiota
Source: Nutrients. 2022 Nov 1;14(21):4581. doi: 10.3390/nu14214581 (PMC9658602; doi:10.3390/nu14214581)
Supplement: Supplementary file 1 [file nutrients-14-04581-s001.zip › Table S1_List of dairy products.xlsx]

## Sheet: Spanish cheeses
Fermented dairy	country	Product name	PDO	Characteristics	Region	Articles in PubMed	Articles in Scopus			Articles describing microbiota composition (molecular methods only)		References		Microbiota composition
Fermented dairy	country	Product name	PDO	Characteristics	Region	Articles in PubMed	Articles in Scopus	Articles from references or differently found	Articles describing microbiota composition (molecular methods only)	References	Other References	Microbiota composition
cheese	Spain	Queso de las Alpujarras	yes		Andalucia	0	0		no
cheese	Spain	Queso de los Pedroches	no	from raw sheep milk, mostly merino of Sierra de Cazorla, goat milk, cow milk and mixtures of all three	Andalucia	0	1		no
cheese	Spain	Queso payoyo	no		Andalucia	0	0		no
cheese	Spain	Quesitos de Zuheros	no		Andalucia	0	0		no
cheese	Spain	Queso de Fuente Palmera	no	Mainly goat milk with Quinkana brand and mixture milk (cow and goat) with brand "La Abuela Valle"	Andalucia	0	0		no
cheese	Spain	Queso de Tronchón	no	made with sheep milk or mixed with goat milk	Aragon	0	0		no
cheese	Spain	Queso Echo y Ansó	no		Aragon	0	0		no
cheese	Spain	Queso de Biescas	no		Aragon	0	0		no
cheese	Spain	Queso Patamulo	no		Aragon	0	0		no
cheese	Spain	Queso de Radiquero	no		Aragon	0	0		no
cheese	Spain	Queso de Benabarre	no		Aragon	0	0		no
cheese	Spain	Queso Pañoleta	no		Aragon	0	0		no
cheese	Spain	Queso de Sahún	no		Aragon	0	0		no
cheese	Spain	Queso de El Burgo	no		Aragon	0	0		no
cheese	Spain	Queso Chistabín	no		Aragon	0	0		no
cheese	Spain	Queso Cabrales	yes		Asturias	13	21		6	Florez et al., 2010 (Candida cabralensis sp. nov.); Florez et al., 2007 (filamentous fungi); Florez et al., 2006; Florez and Mayo, 2006 a,b (DGGE); Alvarez-Martin et al., 2007 (yeasts)		Candida cabralensis sp. nov.; Debaryomyces hansenii, Kluyveromyces lactis, Pichia fermentans, Saccharomyces; Penicillium roqueforti, P. commune, P. chrysogenum, P. citreonigrum, Geotrichum candidum, Acremonium charticola; L. plantarum, Lc. lactis; L.paraplantarum, L. casei, L. paracasei, Leuconostoc mesenteroides, Leuconostoc citreum, Leuconostoc pseudomesenteroides; Lactococcus garvieae, Lactoco…
cheese	Spain	Queso de Afuega el pitu	yes		Asturias	0	0		no
cheese	Spain	Queso de Los Beyos	no		Asturias	0	1		no
cheese	Spain	Queso Casín	yes		Asturias	0	1		1	Alegria et al., 2009		Lactococcus lactis subsp. lactis, Streptococcus thermophilus, Lc. garvieae, Lactobacillus plantarum, Corynebacterium variabile
cheese	Spain	Queso de Gamonedo	yes		Asturias	0	8		1	González de Llano et al., 1992		Lactobacillus plantarum, L. casei spp. casei, Lactococcus lactis spp. lactis, Leuconostoc mesenteroides spp. mesenteroides, L. paramesenteroides.
cheese	Spain	Queso de Peñamellera	no		Asturias	0	6		1	Estepar et al., 1999		Lactococcus lactis subsp. lactis, Lactobacilli
cheese	Spain	Queso de Urbiés	no		Asturias	0	0		no
cheese	Spain	Queso de La Peral	no		Asturias	0	0		no
cheese	Spain	Formatge de Maó	yes		Balearic Islands	0	0		no
cheese	Spain	Formatge Mallorquí	yes		Balearic Islands	0	0		no
cheese	Spain	Queso Idiazábal	yes	shared with Navarre and obtained from Lachen sheep	Basque Country and Navarre	10	66		4	Ortigosa et al., 2008 (Enterococci); Arana et al., 2004 (Atypical Enterococci); Romano et al., 1996 (yeasts); Arizcun et al., 1997		L.plantarum, L. casei, Leuconostoc mesenteroides subsp dextranicum; Candida zeylanoides, Debaryomyces hansenii; E. faecalis, E. faecium, E. avium
cheese	Spain	Queso majorero	yes		Canary Islands	3	15		1	Freitas & Malcata, 2000		Lc. lactis spp. lactis, Lc. lactis spp. cremoris, Lb. Plantarum, Lb. casei, Lb. brevis, Lb. Fermentum, Leuc. paramesenteroides, Leuc. mesenteroides spp. dextranicum, Leuc. mesenteroides spp. mesenteroides, Enter. faecalis spp. liquefaciens, E. faecalis spp. faecalis
cheese	Spain	Queso de flor	yes		Canary Islands	1	1		no
cheese	Spain	Queso palmero	yes		Canary Islands	4	7		no
cheese	Spain	Queso de la Gomera	no		Canary Islands	0	0		no
cheese	Spain	Queso de Lanzarote	no		Canary Islands	0	0		no
cheese	Spain	Queso herreño	no		Canary Islands
cheese	Spain	Picón Bejes-Tresviso	yes	is very similar to Asturian Cabrales, but also has unique features	Cantabria	1	4		no
cheese	Spain	Quesucos de Liébana	yes		Cantabria	1	1		no
cheese	Spain	Queso Nata de Cantabria	yes		Cantabria	0	0		no
cheese	Spain	Queso de Áliva	no		Cantabria	0	2		no
cheese	Spain	Queso de Brez	no		Cantabria	0	0		no
cheese	Spain	Queso Torta de Potes	no		Cantabria	0	0		no
cheese	Spain	Queso Manchego	yes		Castile-La Mancha	47(5)	167(9)		5	Marin et al., 2015 (moulds); Nieto-Arribas et al., 2011 (Enterococci); Nieto-Arribas et al., 2009 (Lc. lactis); Sanchez et al., 2006 (Lactobacillus via RAPD); Freitas & Malcata, 2000 (review)		Geotrichum, Fusarium, Penicillium; Enterococcus faecalis, Enterococcus faecium, Enterococcus hirae and Enterococcus avium; Lactococcus lactis subsp. lactis, Lactococcus lactis subsp. cremoris; L. plantarum, L. brevis, L. paracasei subsp. paracasei, L. fermentum, L. pentosus, L. acidophilus and L. curvatus.
cheese	Spain	Queso de Oropesa	no		Castile-La Mancha	0	0		no
cheese	Spain	Queso zamorano	yes		Castile and León	6	17		no
cheese	Spain	Queso de Valdeón	yes		Castile and León	4	8		1	López-Díaz et al., 2000		Ent. avium, Ent. faecium and Ent. durans, Ent. faecalis, Lact. lactis subspl lactis, Lact. raffinolactis, Lb. plantarum, Lb. casei, Leuc. mesenteroides subsp. dextranicum, Leuc. mesenteroides subsp. mesenteroides, Leuc. paramesenteroides
cheese	Spain	Queso pata de mulo	no		Castile and León	0	0		no
cheese	Spain	Queso castellano	no		Castile and León	2	6		1	Roman-Blanco et al., 1999 (only Bacillus species)		B. circulans, B. pumilus, B. licheniformis
cheese	Spain	Queso de Burgos	no		Castile and León	21	10		1	Garcia et al., 1988 (only Staphylococci and Micrococci)		Staph. auricularis, Staph. caseolyticus, Staph. epidermidis, Staph. gallinarum, Staph. xylosus, Staph. saprophyticus, Staph. cohnii, Staph. sciuri, Staph. lentus, Micrococcus kristinae, M. varians, M. sedentarius
cheese	Spain	Queso del Tiétar	no		Castile and León	0	0		no
cheese	Spain	Formatge de l'Alt Urgell i la Cerdanya	yes		Catalonia	0	0		no
cheese	Spain	Formatge de la Garrotxa	no		Catalonia	0	2		no
cheese	Spain	Serrat	no		Catalonia	0	0		no
cheese	Spain	Llenguat	no		Catalonia	0	0		no
cheese	Spain	Mató	no		Catalonia	0	3		no
cheese	Spain	Tou dels Tillers	no		Catalonia	0	0		no
cheese	Spain	Tupí	no		Catalonia	0	0		no
cheese	Spain	Queso de La Serena	yes		Extremadura	9	17		1	Freitas & Malcata, 2000		Lc lactis, Lb. casei, Lb. plantarum, Leuc. mesenteroides, E. faecium
cheese	Spain	Queso Ibores	yes		Extremadura	2	8		1	Mas et al, 2002		Lactococcus lactis ssp. lactis, Leuconostoc mesenteroides ssp. dextranicum, Ln. mesenteroides ssp. mesenteroides, Weissella paramesenteroides, Enterococcus faecium, E. faecalis, Lactobacillus casei, Lb. plantarum
cheese	Spain	Torta del Casar	yes		Extremadura	2	16		2	Ordiales et al, 2013; Sanchez-Juanes et al., 2020		Lactobacillus curvatus, Lactobacillus diolivorans, Lactobacillus paracasei, Lactobacillus plantarum, Lactobacillus rhamnosus, Lactococcus lactis, Leuconostoc mesenteroides
cheese	Spain	Quesaílla	no		Extremadura	1	1		1	Martín-Platero et al., 2009		Lc. lactis, L. paracasei, L. plantarum, L. paraplantarum, L. curvatus, Enterococci, Leuconostoc sp
cheese	Spain	Queso de Acehúche	no		Extremadura	0	0		no
cheese	Spain	Queso de la Siberia extremeña	no		Extremadura	0	0		no
cheese	Spain	Queso de Gata-Hurdes	no		Extremadura	1	1		no
cheese	Spain	Queso de la Vera	no		Extremadura	0	0		no
cheese	Spain	Queso de Tetilla	yes		Galicia	2	13		2	Atanassova et al., 2016 (yeasts); Garabal et al., 2008		Yarrowia lipolytica, Kluyveromyces lactis, Debaryomyces hansenii, Pichia guilliermondii, Pichia fermentans, Saccharomyces cerevisiae; Lactococci, Leuconostoc, Mesophilic Lactobacilli, Pediococci, Enterococci
cheese	Spain	Queso Arzúa-Ulloa	yes		Galicia	4	14		2	Atanassova et al., 2016 (yeasts); Garabal et al., 2008		Yarrowia lipolytica, Kluyveromyces lactis, Debaryomyces hansenii, Pichia guilliermondii, Pichia fermentans, Saccharomyces cerevisiae; Lactococci, Leuconostoc, Mesophilic Lactobacilli, Pediococci, Enterococci
cheese	Spain	Queso Cebreiro	yes		Galicia	4	16		3	Atanassova et al., 2016 (yeasts); Garabal et al., 2008; Centeno et al., 1996		Yarrowia lipolytica, Kluyveromyces lactis, Debaryomyces hansenii, Pichia guilliermondii, Pichia fermentans, Saccharomyces cerevisiae; Lactococci, Leuconostoc, Mesophilic Lactobacilli, Pediococci, Enterococci
cheese	Spain	Queso San Simón da Costa	no		Galicia	1	6		1	Garabal et al., 2008		Lc. lactis, Lactobacillus
cheese	Spain	Queso de Murcia al vino	yes	made from pasteurized milk of Murcian goats	Murcia	17	17		no
cheese	Spain	Queso de Murcia	yes	made from Murcian goat milk but with characteristics which differ from Queso al Vino	Murcia	17	17		no
cheese	Spain	Queso Roncal	yes		Navarre	8	28		3	Arizcun et al., 1997; Oneca et al., 2003 (L. plantarum strains); Freitas & Malcata 2000		Lc. lactis, Lb. casei, Lb. plantarum, Leuc. dextranicum, Leuc. lactis, Micrococcus saprophyticus, M. lactis, M. roseus, Penicillium, Cephalosporium, Aspergillus, Geotrichum, Pullularia, Mucor, Paecilomyces, Candida, Acremonium
cheese	Spain	Queso Urbasa	no	Menhaden sheep milk	Navarre	0	1		no
cheese	Spain	Queso Ribaforada	no	goat milk	Navarre	0	0		no
cheese	Spain	Queso Cabanillas	no	goat milk	Navarre	0	0		no
cheese	Spain	Queso Lesaca	no	cow milk or a mixture with goat milk	Navarre	0	0		no
cheese	Spain	Queso blanquet	no		Valencian comunity	0	0		no
cheese	Spain	Queso de la Nucia	no		Valencian comunity	0	0		no
cheese	Spain	Queso de cazoleta	no		Valencian comunity	0	0		no
cheese	Spain	Queso de servilleta	no		Valencian comunity	0	1		no
cheese	Spain	Queso Tronchón	no		Valencian comunity	0	0		no

## Sheet: French cheeses
Fermented dairy	country	Product name	PDO	Characteristics	Region	Articles in PubMed	Articles in Scopus			Articles describing microbiota composition (molecular methods only)		References		Microbiota composition
Fermented dairy	Country	Product name	PDO	Characteristics	Region	Articles in PubMed	Articles in Scopus	Articles from references or differently found	Articles describing microbiota composition (molecular methods only)	References	Other References	Microbiota composition
Cheese	France	Abondance	yes	cow milk	Val d'Abondance (Haute-Savoie)	6	14		no	Beuvier, Duboz (2013)
Cheese	France	Beaufort	yes	cow milk	Haute-Provence (Alpes-de-Haute-Provence, Hautes-Alpes, Var et Vaucluse)	5	7		1	Schubert K1 (1996);		Brachybacterium alimentarium sp. nov.
Cheese	France									Beuvier, Duboz (2013)		Brachybacterium tyrofermentans sp. nov
Cheese	France	Camembert de Normandie	yes	cow milk	Normandie (Calvados, Eure, Manche, Orne et Seine-Maritime)	74	201		6	Oh S (2017); Naz S (2013);Gente S (2006)		Lactobacillus plantarum
Cheese	France									Coeuret V (2004); Corroler D (1999)		Geotrichum candidum
Cheese	France									Desmasures (1998); Corroler D (1998)		Lactobacillus plantarum
Cheese	France									Hhong(2020)		Lactobacillus paracasei/casei
Cheese	France											Lactococcus lactis subsp.lactis
Cheese	France											Lactococcus lactis subsp.lactis
Cheese	France											Lactococcus lactis subsp.cremoris
Cheese	France											Lactococcus lactis subsp.lactis
Cheese	France											Lactococcus lactis subsp.cremoris
Cheese	France	Cantal	yes	cow milk		5	18		2	Lortal S (2014); De Freitas I (2008);		Streptococcus thermophilus
Cheese	France									Chabalier C (1997); Chabalier C (1995);		thermophilic lactobacilli/lactococci
Cheese	France									Didelot (2006); De Freitas(2009)		Kluyveromyces lactis
Cheese	France											Yarrowia lipolytica
Cheese	France											Pichia fermentans
Cheese	France											Streptococcus thermophilus
Cheese	France											Lactococcus lactis subsp.lactis
Cheese	France
Cheese	France	Chabichou du Poitou	yes	goat milk	Vienne, Deux-Sèvres and Charente	1	0		no
Cheese	France	Chaource cheese	yes	cow milk	ube andYonne	1	0		no
Cheese	France	Charolais cheese	yes	goat milk	Rhône, Saône-et-Loire, Loire and Allier	0	0
Cheese	France	Chevrotin	yes	goat milk	Massifs du Mont-Blanc, du Chablais, des Aravis and des Bauges (Haute-Savoie andSavoie)	0	0
Cheese	France	Comtè	yes	cow milk	Aveyron, Cantal, Corrèze,Puy-de-Dôme	8	35		1	Didelot (2006)		Candida parapsilosis
Cheese	France
Cheese	France	Crottin de Chavignol	yes	goat mil	Cher, Loiret and Nièvre	0	0					Lactobacillus paracasei
Cheese	France	Époisses	yes	cow milk	Côte-d'Or, Haute-Marne andYonne	4	2		1	Dugat-Bony (2020);Leclercq-Perlat MN (2010)		Virome (?)
Cheese	France											Brevibacterium aurantiacum
Cheese	France											Brevibacterium
Cheese	France											Arthrobacter
Cheese	France	Fourme d'Ambert	yes	cow milk	Puy-de-Dôme, Cantal and Loire	0	1		no
Cheese	France	Fourme de Montbrison	yes	cow milk	Loire et Puy-de-Dôme	0	2		no
Cheese	France	Laguiole	yes	cow milk	Massif de l’Aubrac (Aveyron, Cantal and Lozère)	0	1		no
Cheese	France	Langres	yes	cow milk	Haute-Marne, Vosges et Côte-d'Or	0	0
Cheese	France	Livarot	yes	cow milk	Calvados, Orne	5	6		4	Cogan TM (2014);Larpin-Laborde S (2011)		Candida natalensis
Cheese	France									Mounier J (2009);Larpin S (2006)		Debaryomyces hansenii
Cheese	France									Bonaïti C (2005)		Debaryomyces hansenii
Cheese	France											Kluyveromyces lactis
Cheese	France											Pichia jadinii
Cheese	France											Torulaspora delbrueckii
Cheese	France											Torulaspora delbrueckii
Cheese	France											Staphylococcus saprophitycus
Cheese	France											Staphylococcus pasteuri
Cheese	France											Arthrobacter arilaitensis
Cheese	France											Brachybacterium alimentarium
Cheese	France											Brachybacterium aurantiacum
Cheese	France											Corynebacterium case
Cheese	France											Leucobacter sp.
Cheese	France											Psychrobacter sp.
Cheese	France											Geotrichum candidum
Cheese	France											Agrococcus
Cheese	France											Alcaligenes
Cheese	France											Psychrobacter
Cheese	France											Proteus
Cheese	France											Hafnia
Cheese	France											Microbacterium gubbeenense
Cheese	France											Leucobacter komagatae
Cheese	France											Gamma-Proteobacteria
Cheese	France											Candida catenulata
Cheese	France											Candida intermedia
Cheese	France											Kluyveromyces lactis
Cheese	France
Cheese	France	Mâconnais	yes	goat milk	Saône-et-Loire	0	0
Cheese	France	Maroilles	yes	cow milk		0	4		2	Nacef M (2017);Mounier J (2010)		Lactobacillus plantarum
Cheese	France											L. paracasei
Cheese	France											L. curvatus
Cheese	France											L. rhamnosus
Cheese	France											L. fructivorans
Cheese	France											L. parabuchneri
Cheese	France											L. brevis
Cheese	France											Debaryomyces hansenii
Cheese	France											Geotrichum candidum
Cheese	France	Mont d'Or	yes	cow milk	Doubs	2	2		no
Cheese	France	Morbier	yes	cow milk	Massif jurassien (Ain, Doubs, Jura et Saône-et-Loire)	3	3		no
Cheese	France	Munster	yes	cow milk	Bas-Rhin, Haut-Rhin, Meurthe-et-Moselle, Moselle, Haute-Saône, Territoire de Belfort et Vosges	5	6		0	Izquierdo E (2009); Izquierdo E (2009)b		Enterococcus
Cheese	France									Ennahar S (1998); Leuschner RG (1998)
Cheese	France									Ennahar S (1996)		Lactobacillus plantarum
Cheese	France											Brevibacterium linens
Cheese	France											Lactobacillus plantarum
Cheese	France	Neufchâtel	yes	cow milk	Pays de Bray (Seine-Maritime et Oise)	5	1		no
Cheese	France	Ossau-iraty	yes	goat milk					1	Feutry F (2016); Feutry F ( 2012)		S. thermophilus and Lacotococcus
Cheese	France											Lactococcus lactis
Cheese	France											euconostoc mesenteroides
Cheese	France											Enterococcus durans
Cheese	France											Enterococcus faecium
Cheese	France											Enterococcus faecium
Cheese	France											Enterococcus faecalis
Cheese	France											Lactobacillus paracasei
Cheese	France	Pélardon	yes	goat milk	Aude, Gard, Hérault, Lozère, Tarn	0	0
Cheese	France	Picodon	yes	goat milk	Ardèche, Drôme et canton de Valréas (Vaucluse)	1	0		no
Cheese	France	Pont-l'évêque	yes	cow milk	Normandie (Calvados, Eure, Manche, Orne et Seine-Maritime) et Mayenne	5	1		1	Pracharova P (2019)		Geotrichum candidum
Cheese	France									Coeuret V (2004)
Cheese	France	Pouligny-saint-pierre	yes	goat milk	Indre	0	0
Cheese	France	Reblochon	yes	cow milk	Savoie; Haute-Savoie	11	5		7	Dugat-Bony E (2019);Monnet C (2016);		Streptococcus thermophilus
Cheese	France									Castellote J( 2015);Cogan TM,( 2014)		Geotrichum candidum
Cheese	France									Bora (2008);Mariani C (2007);		Debaryomyces hanseni
Cheese	France									Maudet C (2002); Marcellino N(2001)		Brevibacterium aurantiacum
Cheese	France									Pracharova (2019);		Lactobacillus delbrueckii ssp. bulgaricus
Cheese	France											Mycetocola reblochoni
Cheese	France											Leuconostocs, facultative heterofermentative lactobacilli, enterococci, staphylococci, and pseudomonads
Cheese	France
Cheese	France
Cheese	France
Cheese	France
Cheese	France	Rocamadour	yes	goat milk	Aveyron, Corrèze, Dordogne, Lot et Tarn-et-Garonne	0	1		no
Cheese	France	Roquefort	yes	goat milk	Aude, Aveyron, Gard, Hérault, Lozère, Tarn	11	54		1	Besançon X (1992); de Valdez GF (1986)		Debaryomyces hansenii
Cheese	France									El Attar A (2000); Ismaiel AA (2014)		Candida famata
Cheese	France											Kluyveromyces lactis
Cheese	France											Candida sphaerica
Cheese	France											Brevibacterium linens
Cheese	France											Lactococcus lactis
Cheese	France											Penicillium roqueforti
Cheese	France	Sainte-maure-de-touraine	yes	cow milk	Indre, Indre-et-Loire, Loir-et-Cher et Vienne	0	0
Cheese	France	Saint-nectaire	yes	cow milk	Cantal,Puy-de-Dôme	4	17		1	Delbès C (2007);		Clostridiales, Lactobacillales, Proteobacteria , Actinobacteria e Bacteroidetes
Cheese	France									Dale G,(1971)		Geotrichum candidum
Cheese	France									Marcellino O (2013)
Cheese	France	Salers	yes	cow milk	Aveyron, Cantal, Corrèze, Haute-Loire, Puy-de-Dôme	5	12		5	Didienne R (2012);Duthoit F (2003)		Lactobacillus plantarum
Cheese	France									Duthoit F (2005);Callon C (2004)		Lactobacillus paracasei
Cheese	France									Duthoit F (2005) b		Lactococcus lactis
Cheese	France											Lactococcus garviae
Cheese	France											Enterococcus faecalis
Cheese	France											Enterococcus faecium
Cheese	France											Leuconostoc mesenteroides
Cheese	France											Leuconostoc pseudomesenteroides
Cheese	France											Streptococcus salivarius
Cheese	France											Streptococcus millieri
Cheese	France											Streptococcus macedonicus
Cheese	France											Pediococcus pentosaceus
Cheese	France	Selles-sur-cher	yes	goat milk	Cher, Indre et Loir-et-Cher	0	0
Cheese	France	Tome des Bauges	yes	cow milk	Savoie et Haute-Savoie	0	0
Cheese	France	Valençay	yes	goat milk	Savoie et Haute-Savoie	0	0

## Sheet: Italian cheeses A-F
Fermented dairy	country	Product name	PDO	Characteristics	Region	Articles in PubMed	Articles in Scopus			Articles describing microbiota composition (molecular methods only)		References		Microbiota composition
Fermented dairy	country	Product name	PDO	Characteristics	Region	Articles in PubMed	Articles in Scopus	Articles from references or differently found	Articles describing microbiota composition (molecular methods only)	References	Other References	Microbiota composition
cheese	Italy	Abbamar	no	a semi-soft cheese made from a mixture of cows’ and sheep's milk	Sardinia	0	0		no
cheese	Italy	Accasciato	no	sheep and cow's milk	Tuscany	0	0		no
cheese	Italy	Acceglio	no	a fresh cows’ milk cheese	Acceglio, Piedmont	0	0		no
cheese	Italy	Acidino	no	a goats’ milk cheese	Veneto	0	0		no
cheese	Italy	Aglino	no			0	0		no
cheese	Italy	Agrì di Valtorta	no	made with fresh cows’ or goats’ milk in the Alta Valle Brembana	Lombardy	0	0		no
cheese	Italy	Ainuzzi	no	a cows’ milk cheese	Sicily	0	0		no
cheese	Italy	Aladino	no			0	0		no
cheese	Italy	Algunder Bauernkäse Halbfett	no		South Tyrol	0	0		no
cheese	Italy	Algunder Ziegenkäse	no	goats’ milk cheese		0	0		no
cheese	Italy	Almkäse	no		South Tyrol	0	0		no
cheese	Italy	Alpeggio di Triora	no		Province of Imperia, Ligury	0	0		no
cheese	Italy	Alpepiana	no			0	0		no
cheese	Italy	Alpepiana Macig	no			0	0		no
cheese	Italy	Alpigiana	no		South Tyrol	0	0		no
cheese	Italy	Alpkäse	no		South Tyrol	0	0		no
cheese	Italy	Amatriciano	no		Lazio	0	0		no
cheese	Italy	Ambra di Talamello	no	it is a type of Formaggio di Fossa, a designation for cheeses that are aged underground	Marche	0	0		no
cheese	Italy	Ambrosiana	no			0	0		no
cheese	Italy	Animaletti di Provola	no		Calabria	0	0		no
cheese	Italy	Arunda	no		South Tyrol	0	0		no
cheese	Italy	Aschbacher Magerkäse	no		South Tyrol	0	0		no
cheese	Italy	Asiago	yes		Veneto, Trentino	17	37		no
cheese	Italy	Asiago Montasio	no			0	0		no
cheese	Italy	Asiago pressato	no			0	0		no
cheese	Italy	Asiago stravecchio	no			0	0		no
cheese	Italy	Asìno	no	a curious cheese, although not made from ass's milk	Friuli Venezia Giulia	0	0		no
cheese	Italy	Auricchio	no		Lombardy	0	0		no
cheese	Italy	Bacio	no			0	0		no
cheese	Italy	Bacio di latte di capra	no			0	0		no
cheese	Italy	Bacio di latte di mucca	no			0	0		no
cheese	Italy	Bagòss	no	a grana coloured with saffron	Lombardy	0	0		no
cheese	Italy	Baricot	no			0	0		no
cheese	Italy	Bastardo del Grappa	no	cheese traditionally made with mixed milks	Veneto	0	0		no
cheese	Italy	Bauernkäse	no	a cheese made from pasteurised, semi-skimmed cow's milk	South Tyrol	0	0		no
cheese	Italy	Bebé di Sorrento	no	a cow's milk cheese produced in a similar manner to Caciocavallo sorrentino	Campania	0	0		no
cheese	Italy	Beddo	no	soft, compact, white-bodied cheese made from cow's milk	Piedmont	0	0		no
cheese	Italy	Bedura	no			0	0		no
cheese	Italy	Begiunn	no	creamy-granular ricotta made in summer in the alpine pastures	Piedmont	0	0		no
cheese	Italy	Bel Paese	no			0	0		no
cheese	Italy	Bella Badia	no	soft cow's milk cheese	South Tyrol	0	0		no
cheese	Italy	Bella Lodi	no		Lombardy	0	0		no
cheese	Italy	Belicino	no	a fresh sheep's mik cheese from the Belice valley, containing stoned olives of the type Oliva da Tavola Nocellara del Belice.	Sicily	0	0		no
cheese	Italy	Belmonte	no		Lombardy	0	0		no
cheese	Italy	Bettelmatt	no		Piedmont	0	0		no
cheese	Italy	Bergkäse				5	18		yes	Schmitz-Esser et al., 2018		Advenella ssp Psychrobacter ssp Psychroflexus ssp
cheese	Italy									Quijada et al., 2018		Brevibacterium linens Corynebacterium ssp Halomonas boliviensis Leucobacter ssp Staphylococcus equorum
cheese	Italy									Schornsteiner et al., 2014		Halomonas boliviensis Brevibacterium aurantiacum Debaryomyces hansenii Pyxidiophora arvernensis Scopulariopsis brevicaulis Staphyloccocus equorum
cheese	Italy	Bernardo	no		Lombardy	0	0		no
cheese	Italy	Biancospino	no			0	0		no
cheese	Italy	Bocconcini	no			0	0		no
cheese	Italy	Bianco verde	no	cows’ milk cheese	Trentino	0	0		no
cheese	Italy	Bitto	yes		Lombardy	0	0		no
cheese	Italy	Bitto d'Alpe	no			0	0		no
cheese	Italy	Bitto Valtellina	no			0	0		no
cheese	Italy	Bleu d'Aoste	no		Aosta Valley	0	0		no
cheese	Italy	Blu	no			0	0		no
cheese	Italy	Blu Alpi Cozie	no			0	0		no
cheese	Italy	Blu Antico	no			0	0		no
cheese	Italy	Blu del Moncenisio	no		Piedmont	0	0		no
cheese	Italy	Blu del Moncenisio d'alpeggio	no			0	0		no
cheese	Italy	Blu di montagna	no			0	0		no
cheese	Italy	Blu Val Chiusella	no			0	0		no
cheese	Italy	Bonassai	no		Sardinia	0	0		no
cheese	Italy	Bonrus	no		Piedmont	0	0		no
cheese	Italy	Boscatella di Fiavè	no	soft cheese	Trentino	0	0		no
cheese	Italy	Boschetto al Tartufo	no	a cheese incorporating pieces of white truffle		0	0		no
cheese	Italy	Bormino	no			0	0		no
cheese	Italy	Boves	no		Piedmont	0	0		no
cheese	Italy	Bra duro cheese	no			0	0		no
cheese	Italy	Bra	yes		Piedmont	0	0		no
cheese	Italy	Bra d'alpeggio	no			0	0		no
cheese	Italy	Bra duro	no			0	0		no
cheese	Italy	Bra tenero	no			0	0		no
cheese	Italy	Branzi	no		Lombardy	0	0		no
cheese	Italy	Brebidor	no	soft sheep's milk chees	Sardinia	0	0		no
cheese	Italy	brebiblu	no	modern, soft, ‘blue’ (really green) sheep's milk cheese inoculated with Penicillium roqueforti,	Sardinia	0	0		no
cheese	Italy	Bresciannella	no			0	0		no
cheese	Italy	Bricchetto tartufo	no			0	0		no
cheese	Italy	Brocciu	no			0	0		no
cheese	Italy	Bros	no		Piedmont	0	0		no
cheese	Italy	Brus da latte	no			0	0		no
cheese	Italy	Brus da ricotta	no			0	0		no
cheese	Italy	Brustelmagno	no		Piedmont	0	0		no
cheese	Italy	Bruss di Frabosa	no			0	0		no
cheese	Italy	Bruz	no			0	0		no
cheese	Italy	Bruz d'Murazzan	no			0	0		no
cheese	Italy	Buflona	no			0	0		no
cheese	Italy	Burrata	no	type of mozzarella, stuffed with a mixture of mozzarella and cream		5	6		1	Minervini, F., Conte, A., Del Nobile, M. A., Gobbetti, M., & De Angelis, M. 2017
cheese	Italy	Burrell	no		Lazio	0	0		no
cheese	Italy	Burrino	no		Basilicata, Molise, Campania, Calabria	0	0		no
cheese	Italy	Busche	no			0	0		no
cheese	Italy	Butirro	no		Calabria	0	0		no
cheese	Italy	Butterkäse	no			0	0		no
cheese	Italy	Cachat	no		Piedmont	0	0		no
cheese	Italy	Cacio	no			0	0		no
cheese	Italy	Cacio a forma di limone – Marche	no			0	0		no
cheese	Italy	Cacio di fossa	no	hard, sharp sheep's milk cheese		0	0		no
cheese	Italy	Cacio di vacca bianca	no		Abruzzo	0	0		no
cheese	Italy	Cacio figurato	no			0	0		no
cheese	Italy	Cacio magno	no		Lazio	0	0		no
cheese	Italy	Cacio magno alle erbe	no			0	0		no
cheese	Italy	Cacio marcetto	no		Abruzzo	0	0		no
cheese	Italy	Cacio ubriaco	no			0	0		no
cheese	Italy	Caciocavallo	yes/no		Campania, Abruzzo, Lazio, Calabria, Basilicata, Puglia	29	47		yes	Gielli et al., 2017		Streptococcus thermophilus Acinetobacter johnsonii Corynebacterium sp., L. delbrueckii Lactobacillus helveticus Lactococcus lactis Lactococcus raffinolactis Pseudomonas fragi Pseudomonas sp
cheese	Italy									De Pasquale et al., 2014		Lactobacillus buchneri Lactobacillus casei Lactobacillus paracasei Streptococcus salivarius Streptococcus thermophilus
cheese	Italy									Ercolini et al., 2008		Streptococcus thermophilus Enterococcus spp. Lactobacillus delbrueckii Lactobacillus helveticus Lactococcus lactis Lactococcus raffinolactis
cheese	Italy	Caciocavallo abruzzese	no		Abruzzo	0	0		no
cheese	Italy	Caciocavallo affumicato	no		Campania	0	0		no
cheese	Italy	Caciocavallo del Monaco	no		Campania	0	0		no
cheese	Italy	Caciocavallo di bufala	no		Campania	0	0		no
cheese	Italy	Caciocavallo di Castelfranco in Misciano	no		Campania	1	1		yes
cheese	Italy	Caciocavallo di Cimina	no		Calabria	0	0		no
cheese	Italy	Caciocavallo farcito	no		Campania	0	0		no
cheese	Italy	Caciocavallo di Godrano	no			0	0		no
cheese	Italy	Caciocavallo ragusano	yes		Sicily	0	0		no
cheese	Italy	Caciocavallo silano	yes		Calabria, Basilicata, Campania, Molise and Puglia	3	8		yes
cheese	Italy	Caciocavallo podolico campano	no		Campania	0	0		no
cheese	Italy	Caciocavallo podolico picentino	no			0	0		no
cheese	Italy	Caciocavallo pugliese	no		Puglia	3	7		yes	Di Cagno, R., De Pasquale, I., De Angelis, M., & Gobbetti, M. 2012
cheese	Italy									De Pasquale, I., Di Cagno, R., Buchin, S., De Angelis, M., & Gobbetti, M. 2014
cheese	Italy									M. Gobbetti, M. Morea, F. Baruzzi, M.R. Corbo, A. Maturante, T. Considine, R. Di Cagno, T. Guinee, P.F. Fox. 2002
cheese	Italy	Caciocavallo Silano								A. Corsetti, M.R. Corbo, M. Albenzio, M. Gobbetti, R. Di Cagno, P.F. Fox. 2001
cheese	Italy	Caciocotto	no		Basilicata	0	0		no
cheese	Italy	Caciofiore aquilino	no		Abruzzo	0	0		no
cheese	Italy	Cacioforte	no		Campania	0	0		no
cheese	Italy	Cacioreale	no		Lombardy	0	0		no
cheese	Italy	Cacioricotta	no		Campania, Abruzzo, Lazio, Calabria, Basilicata, Puglia	4	15		no
cheese	Italy	Cacioricotta campana	no		Campania	0	0		no
cheese	Italy	Cacioricotta di bufala	no			0	0		no
cheese	Italy	Cacioricotta di capra cilentina	no		Campania	0	0		no
cheese	Italy	Cacioricotta fresca	no		Lazio	0	0		no
cheese	Italy	Cacioricotta lucano	no		Puglia, Campania, and especially Basilicata	0	0		no
cheese	Italy	Cacioricotta pugliese	no		Puglia	0	0		no
cheese	Italy	Caciotta amiatina	no			0	0		no
cheese	Italy	Caciotta al peperoncino	no		Campania	0	0		no
cheese	Italy	Caciotta calabra	no		Calabria	0	0		no
cheese	Italy	Caciotta campana	no		Campania	0	0		no
cheese	Italy	Caciotta del Fermano	no		Marche	0	0		no
cheese	Italy	Caciotta del Montefeltro	no		Marche	0	0		no
cheese	Italy	Caciotta del Monte Lazzarina	no		Emilia-Romagna	0	0		no
cheese	Italy	Caciotta della Lunigiana	no		Tuscany	0	0		no
cheese	Italy	Caciotta misto pecora	no			0	0		no
cheese	Italy	Caciotta degli Elimi	no			0	0		no
cheese	Italy	Caciotta dei Monti della Laga	no		Lazio	0	0		no
cheese	Italy	Caciotta della sabina	no		Lazio	0	0		no
cheese	Italy	Caciotta di Asiago	no		Veneto	0	0		no
cheese	Italy	Caciotta di Brugnato	no			0	0		no
cheese	Italy	Caciotta di capra	no		Friuli Venezia Giulia	0	0		no
cheese	Italy	Caciotta di latte caprino	no			0	0		no
cheese	Italy	Caciotta di Montemauro	no		Emilia-Romagna	0	0		no
cheese	Italy	Caciotta di pecora	no			0	0		no
cheese	Italy	Caciotta genuina romana	no		Lazio	0	0		no
cheese	Italy	Caciotta mista della Tuscia	no			0	0		no
cheese	Italy	Caciotta di bufala	no		Lazio	0	0		no
cheese	Italy	Caciotta di bufala pontina	no			0	0		no
cheese	Italy	Caciotta Manzone	no			0	0		no
cheese	Italy	Caciotta sarda	no		Sardinia	0	0		no
cheese	Italy	Caciotta senese	no		Tuscany	0	0		no
cheese	Italy	Caciotta toscana	no		Tuscany	0	0		no
cheese	Italy	Caciotta vaccina frentana	no			0	0		no
cheese	Italy	Caciotta	no		South Italy	17	45			Turchi et al., 2016		Lactococcus lactis subsp. lactis Lactobacillus paracasei Lactobacillus rhamnosus
cheese	Italy									Aquilanti et al., 2011		Lactobacillus fermentum L. lactis Lactobacillus raffinolactis Lactobacillus sakei ⁄ curvatus Leuc. mesenteroides Leuc. mesenteroides ssp. mesenteroides Macrococcus caseolyticus Staphylococcus pasteuri Weissella kimchii
cheese	Italy									R. Di Cagno, M. Quinto, A. Corsetti, F. Minervini, M. Gobbetti. 2006
cheese	Italy	Caciottina	no		South Italy	0	0		no
cheese	Italy	Caciottina canestrata di Sorrento	no		Campania	0	0		no
cheese	Italy	Caciottina di bufala	no			0	0		no
cheese	Italy	Caciottina di bufala di Amaseno	no			0	0		no
cheese	Italy	Caciottina di bufala di Amaseno aromatizzata	no			0	0		no
cheese	Italy	Cadolet di capra	no		Lombardy	0	0		no
cheese	Italy	Cafone	no			0	0		no
cheese	Italy	Calcagno	no	pecorino cheese prepared using raw sheep milk and peppercorns,	Sardinia	0	0		no
cheese	Italy	Callu de cabreddu	no			0	0		no
cheese	Italy	Camasciano	no			0	0		no
cheese	Italy	Canestrato	yes, only Canestrato Pugliese		South Italy	10	26			Aquilanti et al., 2006		Enterococcus faecalis Enterococcus faecium L. lactis subsp. lactis L.casei L.pentosus Lact. plantarum Lactobacillus brevis Lactococcus lactis subsp. cremoris Leuc. argentinum
cheese	Italy									Di Cagno et al., 2004		L. fermentum L. casei L. helveticus L. plantarum L. reuteri Lactobacillus delbrueckii Lactococcus lactis subsp. lactis Streptococcus thermophilus
cheese	Italy									Di Cagno et al., 2003		Lb. curvatus, Lb. paracasei subsp. paracasei, Lb. delbrueckii subsp. bulgaricus and Leuconostoc spp
cheese	Italy									Albenzio et al., 2001		Lb. plantarum Lb. paracasei spp. paracasei Lb. brevis Lb. curvatus Lb. pentosus
cheese	Italy									De Pasquale, I., Calasso, M., Mancini, L., Ercolini, D., La Storia, A., De Angelis, M., ... & Gobbetti, M. 2014
cheese	Italy									M.R. Corbo, M. Albenzio, M. De Angelis, A. Sevi, M. Gobbetti. 2001
cheese	Italy	Canestrato crotonese	no		Calabria	0	0		no
cheese	Italy	Canestrato d'Aspromonte	no		Calabria	0	0		no
cheese	Italy	Canestrato di Calabria	no		Calabria	0	0		no
cheese	Italy	Canestrato from Moliterno	no			0	0		no
cheese	Italy	Canestrato di Moliterno Stagionato in Fondaco	IGP	hard mixed sheep’s and goats’ milk cheese from Puglia; it is matured for at least 60 days and may be eaten at table or grated.	Puglia	0	0		no
cheese	Italy	Canestrato pugliese	yes		Puglia	9	23		yes
cheese	Italy	Canestrato sardo	no		Sardinia	0	0		no
cheese	Italy	Canestrato trentino	no		Trentino	0	0		no
cheese	Italy	Canestrato vacchino – Sicily	no			0	0		no
cheese	Italy	Cansiglio	no		Friuli Venezia Giulia	0	0		no
cheese	Italy	Cappello del Mago	no			0	0		no
cheese	Italy	Capretta	no			0	0		no
cheese	Italy	Capridor	no			0	0		no
cheese	Italy	Caprino	no	goats’ cheese	Piedmont, Lombardy, Veneto, Trentino, Friuli Venezia Giulia, Calabria, Sardinia					Zumbo et al.,2009		Lactobacilli Lactococci Enterococci Micrococcaceae Enterobacteriaceae Escherichia coli Staphylococci
cheese	Italy									Cagno et al, 2007		Lactobacillus paracasei Lb. casei Lb. plantarum
cheese	Italy									Foschino et al., 2006		Lactococcus lactis subsp. lactis Galactomyces geotrichum Kluyveromyces lactis L. garvieae L. raffinolactis Streptococcus thermophilus Yarrowia lipolytica
cheese	Italy	Caprino a coagulazione lattica	no		Lombardy	0	0		no
cheese	Italy	Caprino a coagulazione presamica	no		Lombardy	0	0		no
cheese	Italy	Caprino al lattice di fico	no		Marche	0	0		no
cheese	Italy	Caprino al pepe di Bagnolo	no		Piedmont	0	0		no
cheese	Italy	Caprino bicchierino	no			0	0		no
cheese	Italy	Caprino da grattugia	no			0	0		no
cheese	Italy	Caprino dell'Aspromonte	no		Calabria	0	0		no
cheese	Italy	Caprino degli Alburni	no		Campania	0	0		no
cheese	Italy	Caprino dei Nebrodi	no			0	1		yes
cheese	Italy	Caprino della Carnia pasta dura e pasta morbida – Carnia, Province of Udine, Friuli Venezia Giulia	no		Friuli Venezia Giulia	0	0		no
cheese	Italy	Caprino della Limina	no		Calabria	0	0		no
cheese	Italy	Caprino della Val Brevenna	no			0	0		no
cheese	Italy	Caprino della Val Vigezzo	no			0	0		no
cheese	Italy	Caprino di Baceno	no		Piedmont	0	0		no
cheese	Italy	Caprino di Cavalese	no			0	1		yes	Di Cagno, R., Miracle, R. E., De Angelis, M., Minervini, F., Rizzello, C. G., Drake, M. A., ... & Gobbetti, M. 2007
cheese	Italy	Caprino di Demonte	no		Piedmont	0	0		no
cheese	Italy	Caprino di malga delle Alpi Marittime	no		Piedmont	0	0		no
cheese	Italy	Caprino di Montefalcone del Sannio	no			0	0		no
cheese	Italy	Caprino di Rimella	no		Piedmont	0	0		no
cheese	Italy	Caprino di Urbino	no		Marche	0	0		no
cheese	Italy	Caprino di Valsassina	no			0	1		yes	Di Cagno, R., Miracle, R. E., De Angelis, M., Minervini, F., Rizzello, C. G., Drake, M. A., ... & Gobbetti, M. 2007
cheese	Italy	Caprino Francese	no			0	0		no
cheese	Italy	Caprino fresco	no		Abruzzo	0	0		no
cheese	Italy	Caprino fresco veneto	no		Veneto	0	0		no
cheese	Italy	Caprino lattico piemontese	no		Piedmont	0	0		no
cheese	Italy	Caprino lombardo	no		Lombardy	0	1		yes
cheese	Italy	Caprino ossolano	no		Piedmont	0	0		no
cheese	Italy	Caprino presamico piemontese	no		Piedmont	0	0		no
cheese	Italy	Caprino sardo	no		Sardinia	0	0		no
cheese	Italy	Caprino spazzacamino	no			0	0		no
cheese	Italy	Caprino stagionato	no		Basilicata, Campania	0	0		no
cheese	Italy	Caprino trentino	no		Trentino	0	0		no
cheese	Italy	Caprino vaccino	no		Lombardy	0	0		no
cheese	Italy	Caprino Valle	no		Piedmont	0	0		no
cheese	Italy	Caprino valsesiano	no			0	0		no
cheese	Italy	Capriola	no			0	0		no
cheese	Italy	Capritilla	no			1	1		yes	Cagno et al, 2007		Lactobacillus paracasei Lb. casei Lb. plantarum
cheese	Italy	Carboncino	no			0	0		no
cheese	Italy	Carletta	no			0	0		no
cheese	Italy	Carlina	no			0	0		no
cheese	Italy	Carmasciano	no			0	0		no
cheese	Italy	Carnia	no		Friuli Venezia Giulia	0	0		no
cheese	Italy	Casale de Elva	no		Piedmont	0	0		no
cheese	Italy	Casalina	no			0	0		no
cheese	Italy	Casareccio di Gorreto	no			0	0		no
cheese	Italy	Casàt Gardesano	no			0	0		no
cheese	Italy	Casatella	no			0	0		no
cheese	Italy	Casatella Romagnola	no			0	0		no
cheese	Italy	Casatella Trevigiana	yes			0	0		no
cheese	Italy	Casatta nostrana di Corteno Golgi	no		Lombardy	0	0		no
cheese	Italy	Casciotta di Urbino	yes		Marche	0	0		no	R. Di Cagno, S. Buchin, S. De Candia, M. De Angelis, P.F. Fox, M. Gobbetti. 2007
cheese	Italy	Casel Bellunese	no		Veneto	0	0		no
cheese	Italy	Casera	no			0	0		no
cheese	Italy	Casera Crotto	no			0	0		no
cheese	Italy	Casera giovane Valtellina	no		Lombardy	0	0		no
cheese	Italy	Casera uso monte	no			0	0		no
cheese	Italy	Casieddu di Moliterno	no		Basilicata	0	0		no
cheese	Italy	Casizolu	no		Sardinia	0	0		no
cheese	Italy	Casizolu di pecora	no			0	0		no
cheese	Italy	Caso	no			0	0		no
cheese	Italy	Caso conzato	no			0	0		no
cheese	Italy	Caso peruto	no			0	0		no
cheese	Italy	Casolet	no		Lombardy	0	0		no
cheese	Italy	Casolet della Val di Sole	no		Lombardy	0	0		no
cheese	Italy	Casoretta	no			0	0		no
cheese	Italy	Cassatella	no			0	0		no
cheese	Italy	Castel Ariund	no		Lombardy	0	0		no
cheese	Italy	Castelmagno	no			0	0		no
cheese	Italy	Castelmagno	yes		Piedmont	6	9		yes	Dolci et al., 2008		Enterococcus ssp. Lactobacillus casei Lactobacillus coryniformis subsp. torquens Lactobacillus delbrueckii subsp. lactis Lactobacillus paracasei Lactobacillus plantarum Staphyloccocus ssp.
cheese	Italy									Dolci et al., 2010		Streptococcus thermophilus S. agalactiae Lactococcus lactis Lactobacillus plantarum Lb. casei Lb. helveticus
cheese	Italy									Licitra e Carpino, 2014		L. plantarum Lactobacillus paracasei Enterococcus faecalis Enterococcus faecium L. delbrueckii subsp. lactis L. lactis subsp. lactis Lactobacillus casei Lactobacillus coryniformis subsp. torquens
cheese	Italy	Castelrosso	no			0	0		no
cheese	Italy	Casu	no		Sardinia	4	2		no
cheese	Italy	Casu axedu o Frue	no			0	0		no
cheese	Italy	Casu becciu	no			0	0		no
cheese	Italy	Casu cundhídu	no			0	0		no
cheese	Italy	Casu marzu	no			0	0		no
cheese	Italy	Casu de cabreddu	no			0	0		no
cheese	Italy	Casu friscu	no		Sardinia	0	0		no
cheese	Italy	Casu spiattatu	no		Sardinia	0	0		no
cheese	Italy	Cavrin (Cevrin) di Coazze	no		Piedmont	0	0		no
cheese	Italy	Cesio	no			0	0		no
cheese	Italy	Chabri stagionato	no			0	0		no
cheese	Italy	Charbonet	no			0	0		no
cheese	Italy	Cherz	no		Veneto	0	0		no
cheese	Italy	Ciabutin	no			0	0		no
cheese	Italy	Cimbro	no			0	0		no
cheese	Italy	Cingherlino	no			0	0		no
cheese	Italy	Cofanetto	no			0	0		no
cheese	Italy	Comelico	no			0	0		no
cheese	Italy	Conciato romano	no		Lazio	0	0		no
cheese	Italy	Contrin	no			0	0		no
cheese	Italy	Cosacavaddu ibleo	no		Sicily	0	0		no
cheese	Italy	Costa d'Oro	no			0	0		no
cheese	Italy	Crema	no			0	0		no
cheese	Italy	Crema del Friuli	no		Friuli Venezia Giulia	0	0		no
cheese	Italy	Crema del Cuc	no		Friuli Venezia Giulia	0	0		no
cheese	Italy	Crema del Gerrei	no		Sardinia	0	0		no
cheese	Italy	Crema di Fobello capra	no			0	0		no
cheese	Italy	Crescenza	no		Lombardy	10	27		no
cheese	Italy	Crottino al tartufo	no			0	0		no
cheese	Italy	Crucolo	no		Trentino	0	0		no
cheese	Italy	Crutin	no		Piedmont	0	0		no
cheese	Italy	Cuc	no			0	0		no
cheese	Italy	Cuincir	no			0	0		no
cheese	Italy	Cuor	no			0	0		no
cheese	Italy	Cuor di Neve	no			0	0		no
cheese	Italy	Cuor di Valle	no			0	0		no
cheese	Italy	Cuoricino pagina	no			0	0		no
cheese	Italy	Cusiè	no		Piedmont	0	0		no
cheese	Italy	Darraghetto di Viareggio	no		Tuscany	0	0		no
cheese	Italy	Degli Albanesi	no		Calabria	0	0		no
cheese	Italy	Del Colle	no			0	0		no
cheese	Italy	Delizia del Colle	no			0	0		no
cheese	Italy	Devero	no			0	0		no
cheese	Italy	Dobbiaco	no		South Tyrol	0	0		no
cheese	Italy	Dolce Isola misto	no			0	0		no
cheese	Italy	Dolcelatte	no			0	0		no
cheese	Italy	Dolce sardo	no		Sardinia	0	0		no
cheese	Italy	Dolcezza d'Asiago	no		Veneto	0	0		no
cheese	Italy	Dolomiti	no		Trentino	0	0		no
cheese	Italy	D'ora ligure	no		Ligury	0	0		no
cheese	Italy	Due latti quadrotta delle Langhe	no		Piedmont	0	0		no
cheese	Italy	Erborinato	no			0	0		no
cheese	Italy	Erborinato di Artavaggio	no			0	0		no
cheese	Italy	Erborinato di capra	no			0	0		no
cheese	Italy	Erborinato di monte	no			0	0		no
cheese	Italy	Erborinato di pecora delle Alpi Cozzie	no			0	0		no
cheese	Italy	Ericino	no			0	0		no
cheese	Italy	Escarun di pecora	no		Piedmont	0	0		no
cheese	Italy	Falagnone	no			0	0		no
cheese	Italy	Farci-Provola	no			0	0		no
cheese	Italy	Fatulì della Val Saviore – Lombardy	no		Lombardy	0	0		no
cheese	Italy	Fallone di Gravina	no			0	0		no
cheese	Italy	Felciata di Calabria – Calabria	no		Calabria	0	0		no
cheese	Italy	Fiacco di capra	no			0	0		no
cheese	Italy	Fior	no			0	0		no
cheese	Italy	Fior di campo	no			0	0		no
cheese	Italy	Fior di latte	no			16	19		yes	Speranza et al., 2014		Lactobacillus plantarum Lactobacillus casei Pediococcus acidilactici S. thermophilus
cheese	Italy									Coppola et al., 2006		Enterococcus faecalis Enterococcus faecium Enterococcus solitarius Lactobacillus helveticus Lactococcus garvieae Lactococcus lactis Lactococcus raffinolactis Leuconostoc mesenteroides subsp. Mesenteroides Streptococcus parauberis Streptococcus suis Streptococcus thermophilus
cheese	Italy									Minervini, F., Siragusa, S., Faccia, M., Dal Bello, F., Gobbetti, M., & De Angelis, M. 2012
cheese	Italy	Fior di latte laziale	no		Lazio	0	0		no
cheese	Italy	Fior di monte	no			0	0		no
cheese	Italy	Fiordivalle	no			0	0		no
cheese	Italy	Fiore	no			0	0		no
cheese	Italy	Fiore sardo	yes		Sardinia	10	27		yes	Licitra e Carpino, 2014		L. lactis E. faecium L. paracasei L. plantarum
cheese	Italy									Fadda et al., 2017		Kluyveromyces lactis Kluyveromyces marxianus
cheese	Italy									Comunian et al., 2010		Lc. lactis Enterococcus ssp. Lb. casei group Lb. plantarum S. thermophilus
cheese	Italy									Pisano et al., 2006		Lactococcus lactis ssp. lactis Enterococcus faecium Kluyveromyces lactis Lactobacillus brevis Lactobacillus casei Lactobacillus fermentum Lactobacillus plantarum Lactoccocus raffinolactis Lactococcus lactis ssp. cremoris Lactococcus lactis ssp. lactis biovar diacetylactis
cheese	Italy									Fadda et al., 2004		Debaryomyces hansenii, Kluyveromyces lactis, Geotrichum candidum, Candida zeylanoides and Candida lambica
cheese	Italy									Mannu et al., 2000		L. plantarum L. paracasei L. curvatus
cheese	Italy									De Pasquale et al., 2016		Lactococcus lactis Brachybacterium sp Brevibacterium sp. Halomonas variabilis Lactobacillus brevis Lactobacillus delbrueckii Lactobacillus helveticus Lactobacillus parabuchneri Streptococcus thermophilus
cheese	Italy	Fiore sicano	no			0	0		no
cheese	Italy	Fioreta	no			0	0		no
cheese	Italy	Fiorone della Valsassina	no			0	0		no
cheese	Italy	Fiurit	no			0	0		no
cheese	Italy	Flors	no		Friuli Venezia Giulia	0	0		no
cheese	Italy	Fodòm	no			0	0		no
cheese	Italy	Fondue	no		Piedmont, Aosta Valley	5	15		no
cheese	Italy	Fontal	no		Trentino	0	0		no
cheese	Italy	Fontal Fiavè	no		Trentino	0	0		no
cheese	Italy	Fontina	no			0	0		no
cheese	Italy	Fontina	yes		Aosta Valley	10	32		yes	Senini et al., 1997		S. thermophilus E. faecalis Enteroccocus faecium L. lactis subsp. Cremoris L. lactis subsp. lactis
cheese	Italy									Cogan et al.,1997		Enterococcus Lactococcus Lactobacillus Leuconostoc Str. Thermophilus
cheese	Italy									Guzzon et al., 2017		Streptococcus thermophilus Aequorivita Brevibacterium Corynebacterium Lactobacillus Lactobacillus delbrueckii Microbacterium Mycobacterium Propionibacterium Staphylococcus
cheese	Italy									Dolci et al., 2014		Streptococcus thermophilus Bifidobacterium animalis Bradyrhizobium sp. Citrobacter freundii Corynebacterium variabile Enterobacter asburiae Enterococcus faecium Escherichia fergusonii Escherichia vulneris Lactobacillus casei group Lactobacillus delbrueckii Lactobacillus diolivorans Lactobacillus plantarum Lactococcus lactis Marinobacter psychrophilus Propionibacterium acnes Psychrobacter maritimu…
cheese	Italy									Giannino et al.,2009		Streptococcus thermophilus Chryseobacterium spp. Enterococcus faecalis Enterococcus faecium Lactococcus lactis Leuconostoc lactis Macrococcus caseolyticus Pseudomonas spp. Rothia spp.
cheese	Italy									Dolci et al., 2009		Lactococcus lactis subsp. lactis Arthrobacter nicotianae Brevibacterium casei Corynebacterium glutamicum Streptococcus thermophilus
cheese	Italy	Formadi	no		Friuli Venezia Giulia	0	0		no
cheese	Italy	Formandi frant	no			0	0		no
cheese	Italy	Formadi salat	no			0	0		no
cheese	Italy	Formaggella	no		Piedmont, Lombardy	0	0		no
cheese	Italy	Formaggella del Bec	no		Lombardy	0	0		no
cheese	Italy	Formaggella del Luinese	yes			0	0		no
cheese	Italy	Formaggella dell'Adamello	no			0	0		no
cheese	Italy	Formaggella della Val Brembana	no			0	0		no
cheese	Italy	Formaggella della Val Camonica	no			0	0		no
cheese	Italy	Formaggela della Val di Sabbia	no			0	0		no
cheese	Italy	Formaggella della Val di Scalve	no			1	1		no
cheese	Italy	Formaggella della Val Seriana	no			0	0		no
cheese	Italy	Formaggella della Val Trompia	no			0	0		no
cheese	Italy	Formaggella di caglio	no		Piedmont	0	0		no
cheese	Italy	Formaggella tremosine	no			0	0		no
cheese	Italy	Formaggella uso monte	no			0	0		no
cheese	Italy	Formaggella Valcavallina	no			0	0		no
cheese	Italy	Formaggello spazzacamino	no			0	0		no
cheese	Italy	Formaggetta	no			0	0		no
cheese	Italy	Formaggetta della Valle Argentina	no			0	0		no
cheese	Italy	Formaggetta di Bonassola	no			0	0		no
cheese	Italy	Formaggetta di mucca	no			0	0		no
cheese	Italy	Formaggetta di Stella San Giovanni	no			0	0		no
cheese	Italy	Formaggetta savonese	no		Ligury	0	0		no
cheese	Italy	Formaggina	no			0	0		no
cheese	Italy	Formaggio'	no			0	0		no
cheese	Italy	Formaggio a crosta rossa	no			0	0		no
cheese	Italy	Formaggio agordino di malga	no			0	0		no
cheese	Italy	Formaggio Alta Pusteria	no		South Tyrol	0	0		no
cheese	Italy	Formaggio Bastardo del Grappa	no			0	0		no
cheese	Italy	Formaggio caprino del Cilento	no		Campania	0	0		no
cheese	Italy	Formaggio caprino della Limina	no			0	0		no
cheese	Italy	Formaggio coi vermi	no		Lombardy	0	0		no
cheese	Italy	Formaggio caprino d'alpeggio	no			0	0		no
cheese	Italy	Formaggio da spalmare	no			0	0		no
cheese	Italy	Formaggio dei Zaccuni	no			0	0		no
cheese	Italy	Formaggio d'alpeggio di Triora	no			0	0		no
cheese	Italy	Formaggio d'alpe	no		Piedmont	0	0		no
cheese	Italy	Formaggio del cit	no		Friuli Venezia Giulia	0	0		no
cheese	Italy	Formaggio del Gleno	no		Lombardy	0	0		no
cheese	Italy	Formaggio del fieno	no			0	0		no
cheese	Italy	Formaggio del monte	no		South Tyrol	0	0		no
cheese	Italy	Formaggio delle Langue o Trifulin	no		Piedmont	0	0		no
cheese	Italy	Formaggio di capra	no			0	0		no
cheese	Italy	Formaggio di capra di Calabria	no		Calabria	0	0		no
cheese	Italy	Formaggio di "caso"	no		Piedmont	0	0		no
cheese	Italy	Formaggio di colostro ovino	no			0	0		no
cheese	Italy	Formaggio di Fossa	no		Emilia-Romagna, Marche	2	3		yes	Fontana et al., 2010 and 2 paper not available		Psychrobacter celer Brevibacterium casei Brevibacterium linens Enterococcus faecium Lactobacillus delbrueckii Micrococcus luteus Psychrobacter aquimaris Psychrobacter glacincolaus Staphylococcus equorum Staphylococcus vitulinus Streptococcus thermophilus
cheese	Italy									M. Gobbetti, B. Folkerstema, P.F. Fox, A. Corsetti, E. Smacchi, M. De Angelis, J. Rossi, K. Kilcawley, M. Cortini. 1999
cheese	Italy	Formaggio di Fossa di Sogliano	yes
cheese	Italy	Formaggio di malga dei 7 comuni	no			0	0		no
cheese	Italy	Formaggio di Menconico	no			0	0		no
cheese	Italy	Formaggio di montagna	no			0	0		no
cheese	Italy	Formaggio di montagna di Sesto	no			0	0		no
cheese	Italy	Formaggio di montagna friulano	no		Friuli Venezia Giulia	0	0		no
cheese	Italy	Formaggio fiore or Fiore sardo – Sardinia	no		Sardinia	0	0		no
cheese	Italy	Formaggio in crema	no		Piedmont	0	0		no
cheese	Italy	Formaggio marcio or casu marzu	no		Sardinia	0	0		no
cheese	Italy	Formaggio pecorino di Atri	no			0	0		no
cheese	Italy	Formaggio Piave	no			0	0		no
cheese	Italy	Formaggio pressato	no		Lombardy	0	0		no
cheese	Italy	Formaggio salato o Asino	no			0	0		no
cheese	Italy	Formaggio saltarello	no			0	0		no
cheese	Italy	Formaggio di S. Stefano di Quisquina	no			0	0		no
cheese	Italy	Formaggio semigrasso d'alpe	no		Lombardy	0	0		no
cheese	Italy	Formaggio ubriaco	no		Friuli Venezia Giulia	0	0		no
cheese	Italy	Formaggio Val Seriana	no			0	0		no
cheese	Italy	Formaggiola caprina	no			0	0		no
cheese	Italy	Formaggiu ri capra	no			0	0		no
cheese	Italy	Formai de Mut dell'Alta Valle Brembana	no			0	0		no
cheese	Italy	Formai	no			0	0		no
cheese	Italy	Formai de Livign	no			0	0		no
cheese	Italy	Formai de Mut	no			0	0		no
cheese	Italy	Formai de Mut dell'Alta Valle Brembana – DOP – Lombardy	yes		Lombardy	0	0		no
cheese	Italy	Formaio embriago	no		Veneto	0	0		no
cheese	Italy	Furmaggitt di Montevecchia	no		Lombardy	0	0		no
cheese	Italy	Furmaggiu du quagliu	no			0	0		no
cheese	Italy	Furmai	no			0	0		no
cheese	Italy	Furmai del sieur Mario	no			0	0		no
cheese	Italy	Furmai marçèt	no			0	0		no
cheese	Italy	Formazza	no			0	0		no
cheese	Italy	Formella del Friuli	no		Friuli Venezia Giulia	0	0		no
cheese	Italy	Frachet	no		Piedmont	0	0		no
cheese	Italy	Fresa	no		Sardinia	0	0		no
cheese	Italy	Frico balacia	no		Friuli Venezia Giulia	0	0		no
cheese	Italy	Frue	no			0	0		no

## Sheet: Irish cheeses
Fermented dairy	country	Product name	PDO	Characteristics	Region	Articles in PubMed	Articles in Scopus	Articles from references or differently found	Articles describing microbiota composition (molecular methods only)	References	Other References	Microbiota composition
cheese	Ireland	Irish farmhouse smear-ripened cheese				trovato 1		1	sì		Corynebacterium mooreparkense sp. nov. And Corynebacterium casei sp. nov., isolated from the surface of a smear-ripened cheese. Noelle M. Brennan,1,2,3 Roselyn Brown,2 Michael Goodfellow,2 Alan C. Ward,2 Thomas P. Beresford,1 Paul J. Simpson,1 Patrick F. Fox3 and Timothy M. Cogan. International Journal of Systematic and Evolutionary Microbiology (2001), 51, 843–852	Corynebacterium variabile and Corynebacterium ammoniagenes
cheese	Ireland	62 Irish artisanal cheese						1	sì		High-Throughput Sequencing for Detection of Subpopulations of Bacteria Not Previously Associated with Artisanal Cheeses. Lisa Quigley,a,b Orla O’Sullivan,a Tom P. Beresford,b R. Paul Ross,a,c Gerald F. Fitzgerald,b,c and Paul D. Cottera. 2012 Volume 78 Number 16 Applied and Environmental Microbiology p. 5717–5723	Faecalibacterium, Prevotella, and Helcococcus. Arthrobacter and Brachybacterium: Lactococcus and Lactobacillus
cheese	Ireland	Abbey Blue Brie		Cow		0	0
cheese	Ireland	Abbey Smoked Brie		Cow		0	0
cheese	Ireland	Ardagh Castle Gjetost		Goat		0	0
cheese	Ireland	Ardagh Castle Goats Cheese		Goat (from whey)		0	0
cheese	Ireland	Ardagh Castle Ricotta		Goat (from whey)		0	0
cheese	Ireland	Ardrahan		Cow		0	0	1	sì		Jérôme Mounier , Roberto Gelsomino, Stefanie Goerges, Marc Vancanneyt, Katrien Vandemeulebroecke, Bart Hoste, Siegfried Scherer, Jean Swings, Gerald F Fitzgerald, Timothy M Cogan. Surface Microflora of Four Smear-Ripened Cheeses. Appl Environ Microbiol 2005 Nov;71(11):6489-500.	Yeast: Debaryomyces hansenii, Yarrowia lipolytica. Bacteria:Corynebacterium casei, Corynebacterium variabile, Arthrobacter arilait- ensis, Arthrobacter sp., Microbacterium gubbeenense, Agrococcus sp. nov., Brevibacterium linens, Staphylococcus epidermidis, Staphylococcus equorum, Staphylococcus saprophyticus, Micrococcus luteus, Halomonas venusta, Vibrio sp., and Bacillus sp., C. casei and A. ari…
cheese	Ireland	Ardsallagh Hard Goat's Cheese		Goat		0	0
cheese	Ireland	Ardsallagh Smoked Cheese		Goat		0	0
cheese	Ireland	Ardsallagh Soft Goat's Cheese		Goat		0	0
cheese	Ireland	Ballintubber Cheddar with Chives		Cow		0	0
cheese	Ireland	Ballybrie		Cow		0	0
cheese	Ireland	Ballyblue		Cow		0	0
cheese	Ireland	Ballyoak		Cow		0	0
cheese	Ireland	Ballyhooly Blue		Cow		0	0
cheese	Ireland	Ballyporeen with Mixed Irish Herbs		Cow		0	0
cheese	Ireland	Bay Lough Cheddar		Cow		0	0
cheese	Ireland	Bay Lough Cheddar Smoked		Cow		0	0
cheese	Ireland	Bay Lough Cheddar Smoked with Garlic & Herbs		Cow		0	0
cheese	Ireland	Bay Lough Cheddar With Garlic & Herbs		Cow		0	0
cheese	Ireland	Beal Handmade Cheddar		Cow		0	0
cheese	Ireland	Beal Raw Milk Cheddar		Cow		0	0
cheese	Ireland	Beara Blue		Cow		0	0
cheese	Ireland	Bellingham Blue		Cow		0	0
cheese	Ireland	Bluebell Falls Cygnus		Goat		0	0
cheese	Ireland	Bluebell Falls Cygnus with Honey		Goat		0	0
cheese	Ireland	Bluebell Falls Cygnus with Pepper		Goat		0	0
cheese	Ireland	Bluebell Falls Orion		Goat		0	0
cheese	Ireland	Bluebell Falls Pegasus		Goat		0	0
cheese	Ireland	Boilie Cheese Pearls		Cow		0	0
cheese	Ireland	Boilie Goats Cheese Pearls		Goat		0	0
cheese	Ireland	Bó Rua Farm		Cow		0	0
cheese	Ireland	Boyne Valley Blue		Cow		0	0
cheese	Ireland	Burren Gold		Cow		0	0
cheese	Ireland	Cahill's Ardagh Wine Cheese		Cow		0	0
cheese	Ireland	Cahill's Original Irish Porter Cheese		Cow		0	0
cheese	Ireland	Cahill's Whiskey Cheese		Cow		0	0
cheese	Ireland	Cais Dubh		Cow		0	0
cheese	Ireland	Cais Rua		Cow		0	0
cheese	Ireland	Carlow Cheese		Cow		0	0
cheese	Ireland	Carlow Cheese Flavoured		Cow		0	0
cheese	Ireland	Carrigaline		Cow		0	0
cheese	Ireland	Carrigaline Beech Smoked		Cow		0	0
cheese	Ireland	natural Goats Log		Cow		0	0
cheese	Ireland	Carrowholly		Cow		0	0
cheese	Ireland	Carrowholly Cheese Flavoured		Cow		0	0
cheese	Ireland	Cashel Blue		Cow		0	0
cheese	Ireland	Chulchoill		Goat		0	0
cheese	Ireland	Cleire Goats Cheese		Goat		0	0
cheese	Ireland	Clonmore Cheese		Goat		0	0
cheese	Ireland	Coleraine cheddar		Cow		0	0
cheese	Ireland	Coolattin Cheddar		Cow		0	0
cheese	Ireland	Coolea Cheese		Cow		0	0
cheese	Ireland	Cooleeney Farmhouse Cheese		Cow		0	0
cheese	Ireland	Natural Goats Log		Goat		0	0
cheese	Ireland	Corkotta		Cow		0	0
cheese	Ireland	Corleggy Goat's Cheese		Goat		0	0
cheese	Ireland	Cratloe Hills		Sheep		0	0
cheese	Ireland	Creeny		Sheep		0	0
cheese	Ireland	Croghan		Goat		0	0
cheese	Ireland	Crozier Blue		Sheep		0	0
cheese	Ireland	Daru		Cow		0	0
cheese	Ireland	Desmond		Cow		0	0
cheese	Ireland	Dilliskus		Cow		0	0
cheese	Ireland	Doolin		Cow		0	0
cheese	Ireland	Dromana Flavoured		Cow		0	0
cheese	Ireland	Drumlin		Cow		0	0
cheese	Ireland	Dubliner		Cow		0	0
cheese	Ireland	Duhallow		Cow		0	0
cheese	Ireland	Dunbarra		Cow		0	0
cheese	Ireland	Durrus Cheese		Cow		0	0	1			Jérôme Mounier , Roberto Gelsomino, Stefanie Goerges, Marc Vancanneyt, Katrien Vandemeulebroecke, Bart Hoste, Siegfried Scherer, Jean Swings, Gerald F Fitzgerald, Timothy M Cogan. Surface Microflora of Four Smear-Ripened Cheeses. Appl Environ Microbiol 2005 Nov;71(11):6489-500.	Yeast: Debaryomyces hansenii, Yarrowia lipolytica. Bacteria:Corynebacterium casei, Corynebacterium variabile, Arthrobacter arilait- ensis, Arthrobacter sp., Microbacterium gubbeenense, Agrococcus sp. nov., Brevibacterium linens, Staphylococcus epidermidis, Staphylococcus equorum, Staphylococcus saprophyticus, Micrococcus luteus, Halomonas venusta, Vibrio sp., and Bacillus sp., C. casei and A. ari…
cheese	Ireland	Emerald		Cow		0	0
cheese	Ireland	Emerald Irish Brie		Cow		0	0
cheese	Ireland	Fivemiletown Cheddar Range		Cow		0	0
cheese	Ireland	Gabriel		Cow		0	0
cheese	Ireland	Gleann Oir		Goat		0	0
cheese	Ireland	Glebe Brethan		Cow		0	0
cheese	Ireland	Gortnamona		Goat		0	0
cheese	Ireland	Gubbeen		Cow			3+ 1 book chapter	4	sì	1) Corynebacterium mooreparkense, a later heterotypic synonym of Corynebacterium variabile. Gelsomino R, Vancanneyt M, Snauwaert C, Vandemeulebroecke K, Hoste B, Cogan TM, Swings J. Int J Syst Evol Microbiol. 2005;55:1129-1131. 2) Stability of the biodiversity of the surface consortia of Gubbeen, a red-smear cheese. Rea MC, Görges S, Gelsomino R, Brennan NM, Mounier J, Vancanneyt M, Scherer S, Sw…	1) Jérôme Mounier , Roberto Gelsomino, Stefanie Goerges, Marc Vancanneyt, Katrien Vandemeulebroecke, Bart Hoste, Siegfried Scherer, Jean Swings, Gerald F Fitzgerald, Timothy M Cogan. Surface Microflora of Four Smear-Ripened Cheeses. Appl Environ Microbiol 2005 Nov;71(11):6489-500.2)Agrococcus casei sp. nov., isolated from the surfaces of smear-ripened cheeses. Nagamani Bora,1 Marc Vancanneyt,2 Ro…	Corynebacterium mooreparkense, Corynebacterium variabile. Staphylococcus saprophyticus, Coryne- bacterium casei, Brevibacterium auranti- acum, Corynebacterium variabile, Microbacterium gubbeenense, Staphylococcus equorum/cohnii, and Psychrobacter spp.Yeasts Debaryomyces hansenii), Can- dida catenulata, and Candida lusitaniae. B. aurantiacum, C. casei, C. variabile, and Staph. saprophyticus. .D. h…	Microbacteriaceae Agrococcus casei sp. Microbacterium, Microbacterium barkeri Microbacterium gubbeenense sp. Coryne- bacterium casei , Corynebacterium mooreparkense isolates), and Microbacterium gubbeenense .Corynebacterium flavescens
cheese	Ireland	Hegarty's Cheddar		Cow		0	0
cheese	Ireland	Hibernia		Cow		0	0
cheese	Ireland	Imokilly Regato		Cow		0	0
cheese	Ireland	Kerry Blue		Cow		0	0
cheese	Ireland	Kilcummin		Cow		0	0
cheese	Ireland	Killeen Cow's Cheese		Cow		0	0
cheese	Ireland	Killeen Goat's Cheese		Goat		0	0
cheese	Ireland	Knockalara Semi-Hard Sheeps Cheese		Sheep		0	0
cheese	Ireland	Knockalara Sheep's Cheese		Sheep		0	0
cheese	Ireland	Knockanore Flavoured		Cow		0	0
cheese	Ireland	Knockanore Plain		Cow		0	0
cheese	Ireland	Knockanore Smoked		Cow		0	0
cheese	Ireland	Knockatee Cheddar		Cow		0	0
cheese	Ireland	Knockatee Gouda		Cow		0	0
cheese	Ireland	Knockdrinna Fresh Goats Log		Goat		0	0
cheese	Ireland	Knockdrinna Goat's Brined Cheese		Goat		0	0
cheese	Ireland	Knockdrinna Gold		Goat		0	0
cheese	Ireland	Knockdrinna Meadow Sheep's Cheese		Sheep		0	0
cheese	Ireland	Knockdrinna Snow		Goat		0	0
cheese	Ireland	Lavistown		Cow		0	0
cheese	Ireland	Maighean		Cow		0	0
cheese	Ireland	Milleens		Cow		0	0
cheese	Ireland	Millhouse Sheep's Cheese		Sheep		0	0
cheese	Ireland	Mine-gabhar		Goat		0	0
cheese	Ireland	Moonshine Organic Cheese		Cow		0	0
cheese	Ireland	Mossfield		Cow		0	0
cheese	Ireland	Mossfield Flavoured		Cow		0	0
cheese	Ireland	Mossfield Mature		Cow		0	0
cheese	Ireland	Mount Callan Cheddar		Cow		0	0
cheese	Ireland	Oakwood		Cow		0	0
cheese	Ireland	Old Irish Creamery Cheddar (with additions)		Cow		0	0
cheese	Ireland	Old Irish Creamery Extra Mature White Cheddar		Cow		0	0
cheese	Ireland	Old Irish Creamery Smoked Cheddar		Cow		0	0
cheese	Ireland	Old MacDonnells Fresh Cow's Cheese		Cow		0	0
cheese	Ireland	Old MacDonnells Fresh Goat's Cheese		Goat		0	0
cheese	Ireland	Orchard Cottage Fresh Goat's Cheese		Goat		0	0
cheese	Ireland	Orchard Cottage Goat's Cheese in Oil		Goat		0	0
cheese	Ireland	Orla Cheese		Sheep		0	0
cheese	Ireland	Paddy Jack Cheese		Cow		0	0
cheese	Ireland	Shandrum		Cow		0	0
cheese	Ireland	Smoked Ardrahan		Cow		0	0
cheese	Ireland	Smoked Gubbeen		Cow		0	0
cheese	Ireland	Sperrin Blue		Cow		0	0
cheese	Ireland	St Brendan		Cow		0	0
cheese	Ireland	St Brendan Brie Mini		Cow		0	0
cheese	Ireland	St Brigid		Cow		0	0
cheese	Ireland	St Brigid Beag		Cow		0	0
cheese	Ireland	St Gall		Cow		0	0
cheese	Ireland	St Kevin Brie		Cow		0	0
cheese	Ireland	St Killian		Cow		0	0
cheese	Ireland	St Tola Divine		Goat		0	0
cheese	Ireland	St Tola Hard Goat's		Goat		0	0
cheese	Ireland	St Tola Log		Goat		0	0
cheese	Ireland	Tara Ban		Goat		0	0
cheese	Ireland	The Little Milk Company Mild		Cow		0	0
cheese	Ireland	The Little Milk Company Mature		Cow		0	0
cheese	Ireland	The Little Milk Company Vintage		Cow		0	0
cheese	Ireland	The Little Milk Company Brie		Cow		0	0
cheese	Ireland	The Little Milk Company Brewers Gold		Cow		0	0
cheese	Ireland	Tipperary Brie		Cow		0	0
cheese	Ireland	Triskel Dew Drop		Goat		0	0
cheese	Ireland	Triskel Gwenned		Cow		0	0
cheese	Ireland	Triskel Pyramid		Goat		0	0
cheese	Ireland	Waterford Greek Cheese		Cow		0	0
cheese	Ireland	Wicklow Baun		Cow		0	0
cheese	Ireland	Wicklow Blue		Cow		0	0
cheese	Ireland	Wicklow Gold		Cow		0	0
cheese	Ireland	Wilma's Killorglin Cheese		Cow		0	0
cheese	Ireland	Wilma's Killorglin Flavoured Cheese		Cow		0	0

## Sheet: Italian cheeses G-Z
Fermented dairy	country	Product name	PDO	Characteristics	Region	Articles in PubMed	Articles in Scopus			Articles describing microbiota composition (molecular methods only)		References		Microbiota composition
Fermented dairy	country	Product name	PDO	Characteristics	Region	Articles in PubMed	Articles in Scopus	Articles from references or differently found	Articles describing microbiota composition (molecular methods only)	References	Other References	Microbiota composition
cheese	Italy	Galbanino	no			0	0		no
cheese	Italy	Garda Tremosine	no			0	0		no
cheese	Italy	Giacobin de Zena	no			0	0		no
cheese	Italy	Giganti	no		Basilicata	0	0		no
cheese	Italy	Giglio sardo	no		Sardinia	0	0		no
cheese	Italy	Gineprino	no			0	0		no
cheese	Italy	Gingherlino	no		Lombardy	0	0		no
cheese	Italy	Giuncata	no			0	0		no
cheese	Italy	Gioda	no			0	0		no
cheese	Italy	Gioddu	no		Sardinia	2	3		yes	Maoloni et al., 2020		Lactobacillus delbrueckii Galactomyces candidum Geotrichum galactomyces Glomus hyderabadensis Kluyveromyces marxianus Lactobacillus kefiri Lactococcus lactis Pichia cactophila Pseudomonas fragi Saccharomyces cerevisiae Streptococcus thermophilus
cheese	Italy									Maoloni et al., 2020		Lactobacillus delbrueckii subsp. bulgaricus Galactomyces candidum Kluyveromyces marxianus Pichia cactophila
cheese	Italy									Ortu et al.,		L. paracasei L. plantarum L. reuteri
cheese	Italy	Giuncà	no		Piedmont	0	0		no
cheese	Italy	Gorga Ciccarelli Viareggio	no		Tuscany	0	0		no
cheese	Italy	Gorgonzola aging	no			0	0		no
cheese	Italy	Gorgonzola	yes		Lombardy, Piedmont	34	85		yes	Fontana et al., 2010		Psychrobacter celer Brevibacterium casei Brevibacterium linens Enterococcus faecium Lactobacillus delbrueckii Micrococcus luteus Psychrobacter aquimaris Psychrobacter glacincolaus Staphylococcus equorum Staphylococcus vitulinus Streptococcus thermophilus
cheese	Italy									M. Gobbetti, R. Burzigotti, E. Smacchi, A. Corsetti, M. De Angelis. 1998.
cheese	Italy	Gorgonzola a due paste	no			0	0		no
cheese	Italy	Gorgonzola con la coda	no			0	0		no
cheese	Italy	Gorgonzola bresciano	no			0	0		no
cheese	Italy	Gorgonzola tipo piccante	no			0	0		no
cheese	Italy	Gran cacio di Morolo	no			0	0		no
cheese	Italy	Grana	no			0	0		no
cheese	Italy	Grana calabrese	no		Calabria	0	0		no
cheese	Italy	Grana Padano	yes		Lombardy, Piedmont, Trentino, Veneto, Emilia‑Romagna	85	157		yes	Pogačić et al., 2013		Lactobacillus rhamnosus, Lactobacillus casei, Lactobacillus paracasei, Lactobacillus delbrueckii, Lactobacillus helveticus and Pediococcus acidilactici
cheese	Italy									Andrighetto et al., 2004		L. helveticus Lact. delbrueckii subsp. lactis
cheese	Italy									Zago et al., 2020		Lactobacillus delbrueckii, Lacticaseibacillus rhamnosus, Lact. casei, Limosilactobacillus fermentum, Lactococcus raffinolactis, L. helveticus, Streptococcus thermophilus, and Lc. lactis
cheese	Italy	Grana Trentino	no		Trentino	0	0		no
cheese	Italy	Grande Vecchio di Montefollonico	no			0	0		no
cheese	Italy	Granone Lodigiano	no		Lombardy	0	0		no
cheese	Italy	Grappino	no			0	0		no
cheese	Italy	Grasso d'alpe	no		Piedmont	0	0		no
cheese	Italy	Graukäse	no			0	0		no
cheese	Italy	Graukäse della Valle Aurina	no		South Tyrol	0	0		no
cheese	Italy	Gresal	no		Veneto	0	0		no
cheese	Italy	Groviera La Leonessa	no			0	0		no
cheese	Italy	Guttus di pecora grossetano	no		Tuscany	0	0		no
cheese	Italy	Hoch Pustertaler	no	a cow's milk cheese	South Tyrol	0	0		no
cheese	Italy	Inca Volata	no			0	0		no
cheese	Italy	Ircano	no	cheese made from goats’ milk	Sardinia	0	0		no
cheese	Italy	Italico	no		Lombardy	0	0		no
cheese	Italy	Jasperino lombardo	no	cows’ milk cheese	Lombardy	0	0		no
cheese	Italy	Kiba torinese	no		Piedmont	0	0		no
cheese	Italy	Lacarian	no			0	0		no
cheese	Italy	Lagrein	no			0	0		no
cheese	Italy	La Res	no			0	0		no
cheese	Italy	Latteria – Lombardy, Friuli Venezia Giulia	no		Lombardy, Friuli Venezia Giulia	12403	1		no
cheese	Italy	Latteria Delebio	no		Friuli Venezia Giulia	0	0		no
cheese	Italy	Latteria di Fagagna	no			0	0		no
cheese	Italy	Latteria di Livigno	no		Lombardy	0	0		no
cheese	Italy	Liptauer triestino	no		Friuli Venezia Giulia	0	0		no
cheese	Italy	Macagn	no	mountain cows’ milk cheese	Piedmont	0	0		no
cheese	Italy	Maccagno o Toma Maccagno	no			0	0		no
cheese	Italy	Madonie Provola	no	stretched curd cows’ milk cheese	Sicily	0	0		no
cheese	Italy	Maggot cheese	no		Sardinia	0	0		no
cheese	Italy	Magnocca	no			0	0		no
cheese	Italy	Maioc-Magnocca gordana	no		Lombardy	0	0		no
cheese	Italy	Magnùn	no		Piedmont	0	0		no
cheese	Italy	Magro di piatta	no		Lombardy	0	0		no
cheese	Italy	Maiorchino	no			1	1		no
cheese	Italy	Maiorchino di Novara di Sicilia	no		Sicily	0	0		no
cheese	Italy	Malga	no			5	7		yes	Carafa et al., 2015		Lb. paracasei Pediococcus pentosaceus Lb. plantarum Lb. parabuchneri Lb. coryniformis Lb. diolivorans Lb. hilgardii Lb. brevis Lb. rhamnosus Lb. crustorum
cheese	Italy	Malga altopina o dei Sette Comuni	no			0	0		no
cheese	Italy	Malga bellunese	no		Veneto	0	0		no
cheese	Italy	Malga Fane	no			0	0		no
cheese	Italy	Malga o Ugovizza	no		Friuli Venezia Giulia	0	0		no
cheese	Italy	Malga stagionato nelle vinacce	no			0	0		no
cheese	Italy	Malga Stelvio	no		South Tyrol	0	0		no
cheese	Italy	Manteca	no			1	1		no	Suzzi et al., 2003		Trichosporon asahii, Candida parapsilosis, Rhodotorula mucilaginosa, Candida inconspicua
cheese	Italy	Maria provolone di Potenza	no		Basilicata	0	0		no
cheese	Italy	Marzolina	no			0	0		no
cheese	Italy	Marzolino	no			1	1		no
cheese	Italy	Marzolino del Chianti	no		Tuscany	0	0		no
cheese	Italy	Marzolino di Lucardo	no			0	0		no
cheese	Italy	Marzotica	no		Puglia	0	0		no
cheese	Italy	Mascarpin de la Calza	no			0	0		no
cheese	Italy	Mascarpa	no			0	0		no
cheese	Italy	Mascarpone	no			13	22		no
cheese	Italy	Mascarpone di bufala	no			0	0		no
cheese	Italy	Mascarpone di bufala di Battipaglia	no			0	0		no
cheese	Italy	Mascarpone torta	no			0	0		no
cheese	Italy	Mastela	no			0	0		no
cheese	Italy	Mattone or Zeigel	no			0	0		no
cheese	Italy	Mattonella al rosmarino	no			0	0		no
cheese	Italy	Matusc o Magro di latteria	no		Lombardy	0	0		no
cheese	Italy	Mezzapasta	no		Piedmont	0	0		no
cheese	Italy	Millefoglie all'aceto balsamico/Marzemino	no			0	0		no
cheese	Italy	Misto	no			0	0		no
cheese	Italy	Misto capra	no			0	0		no
cheese	Italy	Misto capra di malga	no			0	0		no
cheese	Italy	Misto pecora fresco dei Berici	no			0	0		no
cheese	Italy	Moesin di Fregona	no			0	0		no
cheese	Italy	Mollana della Val Borbera	no			0	0		no
cheese	Italy	Moncenisio	no		Piedmont	0	0		no
cheese	Italy	Montagna	no			7	1		no
cheese	Italy	Montanello	no			0	0		no
cheese	Italy	Montasio	no			15	26		yes	Marino et al., 2003		L. lactis subsp. cremoris L. lactis subsp. lactis L. plantarum L. raffinolactis E. durans E. faecalis E. faecium E. gallinarum E. uberis Enterococcus spp. S. thermophilus Lact. agilis Lact. acidophilus Lact. bifermentans Lact. brevis Lact. casei Lact. fermentum Lact. helveticus Lact. kefiri Lact. paracasei Lact. plantarum Lact. rhamnosus
cheese	Italy	Montasio	yes		Friuli Venezia Giulia, Veneto	0	0		no
cheese	Italy	Mont Blanc	no			0	0		no
cheese	Italy	Mont Blanc peppe	no			0	0		no
cheese	Italy	Monte Baldo e Monte Baldo primo fiore	no			0	0		no
cheese	Italy	Monte delle Dolomiti	no		Trentino	0	0		no
cheese	Italy	Monte Veronese	yes		Veneto	0	0		no
cheese	Italy	Monte Veronese di malga	no			0	0		no
cheese	Italy	Monte Veronese ubriaco all'amarone	no		Veneto	0	0		no
cheese	Italy	Montébore	no	cheese made from mixed cows’ and sheep's milk	Piedmont	0	0		no
cheese	Italy	Montegranero	no			0	0		no
cheese	Italy	Morello	no	cheese made from ewe's milk with added live lactic cultures	Tuscany	0	0		no
cheese	Italy	Morlâc	no			0	0		no
cheese	Italy	Morlacco	no		Veneto	1	1		no
cheese	Italy	Mortrett (Murtret)	no			0	0		no
cheese	Italy	Mortaràt	no	the curds are coated with natural flavourings such as alpine herbs, spices, walnuts, maize flour	Piedmont	0	0		no
cheese	Italy	Mortaràt Ciambella aromatica	no			0	0		no
cheese	Italy	Motelì	no			0	0		no
cheese	Italy	Motta	no			0	0		no
cheese	Italy	Mottolina	no		Piedmont	0	0		no
cheese	Italy	Mottolino	no			0	0		no
cheese	Italy	Mozzarella di bufala	no			0	0		no
cheese	Italy	Mozzarella	no		Campania,Lazio	348	1057		yes	Pisano et al., 2016		P. fluorescens Bacillus licheniformis Candida lipolytica Candida sake Cattleya intermedia Filobasidium globisporum Kluyveromyces marxianus Lactobacillus delbrueckii subsp. lactis Moraxella Rhodotorula mucilaginosa S. thermophilus Saccharomyces cerevisiae Serratia
cheese	Italy									Jeronymo-Ceneviva et al, 2014		Lactobacillus casei SJRP35, Leuconostoc citreum SJRP44, Lactobacillus delbrueckii subsp. bulgaricus SJRP57 and Leuconostoc mesenteroides subsp. mesenteroides SJRP58
cheese	Italy									Morea et al., 1999		Leuconostoc mesenteroides subsp. mesenteroides, Leuc. lactis, Streptococcus thermophilus, Strep. boris, Strep. uberis, Lactococcus lactis subsp, lactis, L. garviae, Carnobacterium divergens, C. piscicola, Aerococcus viridans, Staphylococcus carnosus, Staph. epidermidis, Enterococcus faecalis, Ent. sulphureus and Enterococcus spp
cheese	Italy									Romano et al., 2011		S. cerevisiae C. kefir Candida spherica K. lactis Kluyveromyces marxianus
cheese	Italy	Mozzarella di bufala campana	yes		Campania,Lazio	22	50		yes
cheese	Italy	Murazzano	yes		Piedmont	0	0		no
cheese	Italy	Murianengo	no		Piedmont	0	0		no
cheese	Italy	Mursin	no			0	0		no
cheese	Italy	Murtarat	no			0	0		no
cheese	Italy	Musulupu	no			0	0		no
cheese	Italy	Nevegal	no			0	0		no
cheese	Italy	Nis	no			0	0		no
cheese	Italy	Nocciolino di ceva	no			0	0		no
cheese	Italy	Nostrale d'alpe	no		Piedmont	0	0		no
cheese	Italy	Nostrano	no			0	0		no
cheese	Italy	Nostrano di malga	no			0	0		no
cheese	Italy	Nostrano d'alpe	no		Piedmont	0	0		no
cheese	Italy	Nostrano de casèl	no			0	0		no
cheese	Italy	Nostrano del Primiero	no		Trentino	0	0		no
cheese	Italy	Nostrano di Costalta	no			0	0		no
cheese	Italy	Nostrano di Crodo	no		Piedmont	0	0		no
cheese	Italy	Nostrano di latteria	no		Piedmont	0	0		no
cheese	Italy	Nostrano di malga trentino	no		Trentino	0	0		no
cheese	Italy	Nostrano Fiavé	no			0	0		no
cheese	Italy	Nostrano grasso	no			0	0		no
cheese	Italy	Nostrano misto capra	no		Trentino	0	0		no
cheese	Italy	Nostrano prealpino	no			0	0		no
cheese	Italy	Nostrano semigrasso	no		Trentino	0	0		no
cheese	Italy	Nostrano della Val di Fassa	no		Trentino	0	0		no
cheese	Italy	Nostrano Valchiese	no		Trentino	0	0		no
cheese	Italy	Nostrano Valtrompia	yes			0	0		no
cheese	Italy	Nusnetto bresciano	no		Lombardy	0	0		no
cheese	Italy	Ol Sciur	no		Lombardy	0	0		no
cheese	Italy	Ormea	no		Piedmont	0	0		no
cheese	Italy	Orrengigo di Pistoia	no		Tuscany	0	0		no
cheese	Italy	Ortler	no		South Tyrol	0	0		no
cheese	Italy	Ostrica di montagna	no		Piedmont	0	0		no
cheese	Italy	Ossolano d'alpe	yes	cows' milk cheese	Piedmont	0	0		no
cheese	Italy	Paddaccio	no			0	0		no
cheese	Italy	Paddraccio	no			0	0		no
cheese	Italy	Padduni	no			0	0		no
cheese	Italy	Paglierina	no		Piedmont	0	0		no
cheese	Italy	Paglierina apassitta	no			0	0		no
cheese	Italy	Paglierina di rifreddo	no		Piedmont	0	0		no
cheese	Italy	Paglietta	no		Piedmont	0	0		no
cheese	Italy	Paglietta delle Langhe	no			0	0		no
cheese	Italy	Paglietta piemontese	no			0	0		no
cheese	Italy	Pallone di Gravina	no		Puglia, Basilicata	0	0		no
cheese	Italy	Pampanella	no			0	0		no
cheese	Italy	Pancette	no		Basilicata	0	0		no
cheese	Italy	Pannarello	no			0	0		no
cheese	Italy	Pannerone Lodigiano	no		Lombardy	0	0		no
cheese	Italy	Parmigiano-Reggiano	yes		Emilia-Romagna, Lombardy	117	258		yes	Solieri at al., 2012		Lactobacillus rhamnosus Lactobacillus paracasei Lactobacillus casei Lactobacillus harbinensis Lactobacillus fermentum
cheese	Italy									Neviani et al., 2009		Lactobacillus rhamnosus Lactobacillus helveticus Lactobacillus fermentum Pediococcus acidilactici Lactobacillus plantarum Lactobacillus delbrueckii subsp. lactis Lactobacillus casei Lactobacillus reuteri Lactobacillus kefiri
cheese	Italy									Belletti et al., 2009		Lactobacillus helveticus L. delbrueckii subsp. lactis L. rhamnosus L. casei
cheese	Italy									Gala et al., 2008		Lactobacillus casei Lactobacillus buchneri Lactobacillus delbrueckii subsp. lactis Lactobacillus helveticus Lactobacillus parabuchneri
cheese	Italy									Coppola et al., 2000		pediococci L. casei L. paracasei ssp. paracasei L. paracasei ssp. tolerans L. rhamnosus Streptococcus thermophilus
cheese	Italy									Coppola et al., 1997		Lb. paracasei subsp. paracasei Lb. casei Lb. paracasei subsp. Tolerans Lb. rhamnosus Pediococcus acidilactici
cheese	Italy									Bertani et al., 2019		L. helveticus L. delbrueckii ssp. lactis L. fermentum S. thermophilus
cheese	Italy									Coloretti et al., 2017		K. marxianus
cheese	Italy									Solieri at al., 2014		Lactobacillus fermentum Lactobacillus harbinensis Lactobacillus casei Lactobacillus paracasei Lactobacillus rhamnosus
cheese	Italy	Pastore	no			0	0		no
cheese	Italy	Pastorella del Cerreto di Sorano	no			0	0		no
cheese	Italy	Pastorino	no			0	0		no
cheese	Italy	Pecora	no			0	0		no
cheese	Italy	Pecoricco	no		Puglia	0	0		no
cheese	Italy	Pecorini	no		Calabria	0	0		no
cheese	Italy	Pecorino	no	sheep's-milk cheese		82	192		yes	De Pasquale et al., 2019		Leuconostoc mesenteroides subsp. Mesenteroides L. casei Leuc. mesenteroides subsp. mesenteroides Lactobacillus plantarum Lactobacillus casei
cheese	Italy									Guarcello et al., 2016		Lactococcus lactis subsp. lactis Enterococcus faecalis Lactococcus garviae Streptococcus macedonicus
cheese	Italy									De Pasquale et al., 2016		Lactococcus lactis Brachybacterium sp Brevibacterium sp. Halomonas variabilis Lactobacillus brevis Lactobacillus delbrueckii Lactobacillus helveticus Lactobacillus parabuchneri Streptococcus thermophilus
cheese	Italy									Mormile et al., 2016		Enterococcus faecium Enterococcus durans Enterococcus faecalis L. lactis subsp. cremoris Lactococcus lactis subsp. lactis
cheese	Italy									Caggia et al., 2015		L. rhamnosus Lactobacillus paracasei
cheese	Italy									Ricciardi et al, 2014		L. plantarum L. casei Lactococcus lactis Streptococcus thermophilus
cheese	Italy									Mangia et al., 2013		Streptococcus thermophilus Lactobacillus casei Lactobacillus plantarum Lactococcus lactis subsp. lactis
cheese	Italy									Madrau et al., 2006		Lactococcus lactis Streptococcus thermophilus Lactobacillus helveticus Lb. casei
cheese	Italy									Bonomo et al., 2012		Brevibacterium linens Lactobacillus delbrueckii subsp. bulgaricus Lactobacillus paracasei subsp. paracasei Leuconostoc lactis Leuconostoc mesenteroides subsp. Mesenteroides
cheese	Italy									Randazzo et al., 2010		Lactococcus lactis Lactobacillus buchneri Lactobacillus plantarum Lactobacillus rhamnosus Leuconostoc mesenteroides Streptococcus thermophilus
cheese	Italy									Vernile et al., 2008		Lb. curvatus Lactobacillus paracasei Lb. plantarum Lb. pentosus Lb. rhamnosus
cheese	Italy									Aquilanti et al., 2007		Enterococcus faecium E. faecalis L. lactis Lact. plantarum Lactobacillus fermentum Lactobacillus paracasei Lactobacillus rhamnosus
cheese	Italy									Randazzo et al., 2007		Lactobacillus casei Lb. plantarum Lb. rhamnosus
cheese	Italy									Gardini et al., 2006		Kluyveromyces lactis Debaryomyces hansenii Saccharomyces cerevisiae Yarrowia lipolytica
cheese	Italy									Coda et al., 2006		Lactobacillus casei, and Lactobacillus brevis Lb. plantarum and Lactobacillus paracasei
cheese	Italy									Caridi 2003		Lactobacillus Leuconostoc spp Streptococcus Pediococcus
cheese	Italy									Mannu 2002		L. lactis Enterococci
cheese	Italy									Mannu 2002		Lactobacillus delbrueckii, Lactobacillus helveticus and Streptococcus thermophilus
cheese	Italy									Cappello et al., 2001		Lactobacillus brevis, L. plantarum, L. casei, L. sakei, L. pentosus, L. farciminis and Leuconostoc mesenteroides
cheese	Italy									Bizzarro et al., 2000		Lactococcus lactis subsp. lactis, Streptococcus thermophilus
cheese	Italy									Aponte et al., 2007		Streptococcus thermophilus, Lactobacillus rhamnosus, Streptococcus macedonicus
cheese	Italy									Dolci et al., 2008		L. lactis subsp. lactis Lactococcus garvieae Enterococcus casseliflavus Enterococcus faecalis Enterococcus faecium L. lactis subsp. cremoris Lactobacillus paracasei Lactobacillus plantarum Leuconostoc pseudomesenteroides Streptococcus infantarius subsp. infantarius Vagococcus carniphilus
cheese	Italy	Pecorino a crosta fiorita	no			0	0		no
cheese	Italy	Pecorino baccellone	no			0	0		no
cheese	Italy	Pecorino bagnolese	no		Piedmont	0	0		no
cheese	Italy	Pecorino brindisino	no		Puglia	0	0		no
cheese	Italy	Pecorino crotonese	yes			3	4		yes
cheese	Italy	Pecorino d'Abruzzo	no		Abruzzo	0	3		no
cheese	Italy	Pecorino dei Berici	no			0	0		no
cheese	Italy	Pecorino del Casentino	no		Tuscany	0	0		no
cheese	Italy	Pecorino del Parco di Migliarino-San Rossore	no			0	0		no
cheese	Italy	Pecorino della costa apuana	no		Ligury	0	0		no
cheese	Italy	Pecorino della Garfagnana	no		Tuscany	0	0		no
cheese	Italy	Pecorino della Lunigiana	no		Tuscany	0	0		no
cheese	Italy	Pecorino della Versilia	no		Tuscany	0	0		no
cheese	Italy	Pecorino delle balze volterrane	yes		Tuscany	0	0		no
cheese	Italy	Pecorino di Carmasciano	no			2	1		yes
cheese	Italy	Pecorino di Farindola	no			7	7		yes
cheese	Italy	Pecorino di Filiano	no	hard pecorino	Basilicata	2	4		yes
cheese	Italy	Pecorino di Garfagnina	no		Tuscany	0	0		no
cheese	Italy	Pecorino di Moliterno	no			0	0		no
cheese	Italy	Pecorino di montagna	no			0	0		no
cheese	Italy	Pecorino di Osilo	no			0	0		no
cheese	Italy	Pecorino di Pian di Vas	no		Friuli Venezia Giulia	0	0		no
cheese	Italy	Pecorino di Pienza stagionato	no		Tuscany	0	0		no
cheese	Italy	Pecorino di Picinisco	yes			0	0		no
cheese	Italy	Pecorino di Romagna	no			0	0		no
cheese	Italy	Pecorino fiorone	no			0	0		no
cheese	Italy	Pecorino foggiano	no		Puglia	0	0		no
cheese	Italy	Pecorino leccese	no		Puglia	0	0		no
cheese	Italy	Pecorino lucano	no		Basilicata	0	0		no
cheese	Italy	Pecorino Monte Re	no		Friuli Venezia Giulia	0	0		no
cheese	Italy	Pecorino Romano	yes		lazio,Tuscany, Sardinia	5	26		yes
cheese	Italy	Pecorino rosso volterrano - Tuscany	no		Tuscany	0	0		no
cheese	Italy	Pecorino sardo	yes		Sardinia	7	19		yes
cheese	Italy	Pecorino senese	no		Tuscany	0	0		no
cheese	Italy	Pecorino siciliano	yes		Sicily	13	21		no
cheese	Italy	Pecorino stagionato in foglie di noce	no			0	0		no
cheese	Italy	Pecorino subasio	no			0	0		no
cheese	Italy	Pecorino toscano	yes		Tuscany	2	10		no
cheese	Italy									A. Corsetti, M. Gobbetti, E. Smacchi, M. De Angelis, J. Rossi. 1998
cheese	Italy									M. Gobbetti, A. Corsetti, E. Smacchi, M. De Angelis, J. Rossi. 1996
cheese	Italy									M. De Angelis, A. Corsetti, N. Tosti, J. Rossi, M.R. Corbo, M. Gobbetti. 2001
cheese	Italy									R. Coda, E. Brechany, M. De Angelis, S. De Candia, R. Di Cagno, Gobbetti M. 2006
cheese	Italy	Pecorino veneto	no		Veneto	0	0		no
cheese	Italy	Pepato	no			0	0		no
cheese	Italy	Peretta	no		Sardinia	1	1		no
cheese	Italy	Perlanera	no			0	0		no
cheese	Italy	Pettirosso "Tipo Norcia"	no			0	0		no
cheese	Italy	Piacentinu or Piacentino	no			0	0		no
cheese	Italy	Piacentinu di Enna	yes		Sicily	0	0		no
cheese	Italy	Piattone	no			0	0		no
cheese	Italy	Piave	yes		Veneto	0	0		no
cheese	Italy	Piave Fresco	no			0	0		no
cheese	Italy	Piave Mezzano	no			0	0		no
cheese	Italy	Piave Vecchio	no			0	0		no
cheese	Italy	Piave Vecchio Selezione Oro	no			0	0		no
cheese	Italy	Piave Vecchio Riserva	no			0	0		no
cheese	Italy	Piddiato	no			0	0		no
cheese	Italy	Pierino	no			0	0		no
cheese	Italy	Pioda S.Maria	no			0	0		no
cheese	Italy	Piodino	no			0	0		no
cheese	Italy	Piramide	no			0	0		no
cheese	Italy	Piramide di capra	no			0	0		no
cheese	Italy	Piramide in foglia	no			0	0		no
cheese	Italy	Piscedda	no			0	0		no
cheese	Italy	Pirittas	no			0	0		no
cheese	Italy	Pojna enfumegada	no		Trentino	0	0		no
cheese	Italy	Poina enfumegada	no		Trentino	0	0		no
cheese	Italy	Pratolina	no			0	0		no
cheese	Italy	Pressato	no		Veneto	0	0		no
cheese	Italy	Presolana-Valseriana	no		Lombardy	0	0		no
cheese	Italy	Prescinseua	no		Ligury	0	0		no
cheese	Italy	Primo sale	no			0	0		no
cheese	Italy	Primolino	no			0	0		no
cheese	Italy	Primusali	no			0	0		no
cheese	Italy	Provola	no			5	16		no
cheese	Italy	Provola affumicata	no	smoked cow’s milk cheese	Campania,Lazio	0	0		no
cheese	Italy	Provola affumicata di bufala	no	smoked water buffalo’s-milk cheese	Campania,Lazio	0	0		no
cheese	Italy	Provola di bufala	no	water buffalo's-milk cheese from Lazio	lazio	0	0		no
cheese	Italy	Provola Capizzi	no			0	0		no
cheese	Italy	Provula casale (Floresta)	no			0	0		no
cheese	Italy	Provola dei Monti Sicari	no			0	0		no
cheese	Italy	Provola dei Nebrodi	no		Sicily	0	0		no
cheese	Italy	Provola delle Madonie	no		Sicily	0	0		no
cheese	Italy	Provola ragusana	no		Sicily	0	0		no
cheese	Italy	Provola siciliana	no		Sicily	0	0		no
cheese	Italy	Provola silana	no		Calabria	0	0		no
cheese	Italy	Provole	no		Basilicata	0	0		no
cheese	Italy	Sliced provolone	no			0	0		no
cheese	Italy	Provolone	no			0	0		no
cheese	Italy	Provolone del Monaco	yes			0	0		no
cheese	Italy	Provolone piccante	no			0	0		no
cheese	Italy	Provolone sardo	no		Sardinia	0	0		no
cheese	Italy	Provolone siciliano	no		Sicily	0	0		no
cheese	Italy	Provolone Valpadana	yes		Lombardy, Veneto, Emilia-Romagna, Trentino	0	0		no
cheese	Italy	Provolone Vernengo	no			0	0		no
cheese	Italy	Pusteria	no			0	0		no
cheese	Italy	Pustertaler	no		South Tyrol	0	0		no
cheese	Italy	Puzzone	no			1	3		no
cheese	Italy	Puzzone Bochiotti	no			0	0		no
cheese	Italy	Puzzone di Moena	yes		Trentino	0	0		no
cheese	Italy	Puzzone Vandercaro	no			0	0		no
cheese	Italy	Quadro	no			0	0		no
cheese	Italy	Quadro di capra	no			0	0		no
cheese	Italy	Quadro provenzale	no			0	0		no
cheese	Italy	Quagliata ligure	no		Ligury	0	0		no
cheese	Italy	Quartirolo Lombardo	yes		Lombardy	0	7		no
cheese	Italy	Raschera	yes		Piedmont	0	0		no
cheese	Italy	Raschera d'alpeggio	no		Piedmont	0	0		no
cheese	Italy	Ragusano	yes		Sicily	24	36		yes	Randazzo et al., 2002		Leuconostoc, Lactococcus lactis, Streptococcus thermophilus, Lactobacillus delbrueckii, Lactobacillus fermentum and Macrococcus caseolyticus
cheese	Italy	Rasco	no			0	0		no
cheese	Italy	Raspadura	no			0	0		no
cheese	Italy	Ravaggiolo romagnolo	no			0	0		no
cheese	Italy	Raveggiolo	no		Tuscany	0	0		no
cheese	Italy	Raviggiolo	no			0	0		no
cheese	Italy	Raviggiolo di pecora	no			0	0		no
cheese	Italy	Raviggiolu	no		Sardinia	0	0		no
cheese	Italy	Reblec de crama	no	cow's milk	Aosta Valley	0	0		no
cheese	Italy	Réblèque	no	cow's milk	Aosta Valley	0	0		no
cheese	Italy	Reblo	no			0	0		no
cheese	Italy	Reblò alpino	no			0	0		no
cheese	Italy	Reblo cremoso Valle Susa	no		Piedmont	0	0		no
cheese	Italy	Reblochon	no		Piedmont	0	0		no
cheese	Italy	Rebruchon	no			0	0		no
cheese	Italy	Regato	no			0	0		no
cheese	Italy	Renàz	no			0	0		no
cheese	Italy	Riavulillo	no			0	0		no
cheese	Italy	Ricotta	no			106	214		no	Cosentino et al., 2001		Debaryomyces hansenii Dekkera anomala Geotrichum candidum K. marxianus Kluyveromyces lactis Rhodotorula rubra Y. lipolytica
cheese	Italy									Baruzzi et al., 2000		Lact. kefiri Lact. paracasei Lact. plantarum
cheese	Italy	Ricotta affumicata di Mammola	no			0	0		no
cheese	Italy	Ricotta caprina friulana	no		Friuli Venezia Giulia	0	0		no
cheese	Italy	Ricotta di bufala	no			0	0		no
cheese	Italy	Ricotta di bufala affumicata	no			0	0		no
cheese	Italy	Ricotta di bufala infornata	no			0	0		no
cheese	Italy	Ricotta di bufala salata	no			0	0		no
cheese	Italy	Ricotta essiccata di bufala	no			0	0		no
cheese	Italy	Ricotta fresca di bufala	no			0	0		no
cheese	Italy	Ricotta di fuscella	no			0	0		no
cheese	Italy	Ricotta forte	no		Campania	2	5		yes
cheese	Italy	Ricotta gentile	no		Sardinia	0	0		no
cheese	Italy	Ricotta moliterna	no			0	0		no
cheese	Italy	Ricotta mustia	no			0	0		no
cheese	Italy	Ricotta pecorina Monte Re	no		Friuli Venezia Giulia	0	0		no
cheese	Italy	Ricotta romana	yes		lazio	0	0		no
cheese	Italy	Ricotta salata	no			8	13		no
cheese	Italy	Ricotta siciliana	no		Sicily	0	0		no
cheese	Italy	Ricotta vaccina affumicata ossolana	no		Piedmont	0	0		no
cheese	Italy	Ricottadi	no			0	0		no
cheese	Italy	Ricotta forte	no		Puglia	0	0		no
cheese	Italy	Rigatino di Castel San Pietro	no			0	0		no
cheese	Italy	Robiola	no			6	12		yes	Biolcati et al., 2020		Lc. lactis Leuconostoc mesenteroides Enterococcus spp. Lactobacillus spp. Kluyveromyces spp. Geotrichum candidum Yarrowia lipolytica
cheese	Italy									Bonetta et al., 2008		Streptococcus spp. Lactococcus lactis subsp. Lactis Lactococcus lactis subsp. cremoris Streptococcus macedonicus Lactococcus garvieae Streptococcus parauberis
cheese	Italy	Robiola Alta Langa	no		Piedmont	0	0		no
cheese	Italy	Robiola bresciana	no		Lombardy	0	0		no
cheese	Italy	Robiola Cavour	no		Piedmont	0	0		no
cheese	Italy	Robiola contadina	no			0	0		no
cheese	Italy	Robiola d'Alba al tartufo	no		Piedmont	0	0		no
cheese	Italy	Robiola della nonna	no			0	0		no
cheese	Italy	Robiola della Val Bormida	no			0	0		no
cheese	Italy	Robiola della Valsassina	no			0	0		no
cheese	Italy	Robiola delle Langhe	no		Piedmont	0	0		no
cheese	Italy	Robiola di Bossolasco	no			0	0		no
cheese	Italy	Robiola di Castel San Giovanni	no			0	0		no
cheese	Italy	Robiola di Ceva o Mondovì	no		Piedmont	0	0		no
cheese	Italy	Robiola di Cocconato	no			0	0		no
cheese	Italy	Robiola di Intropio	no			0	0		no
cheese	Italy	Robiola di Montevecchia	no		Lombardy	0	0		no
cheese	Italy	Robiola di pecora	no			0	0		no
cheese	Italy	Robiola di Roccaverano	yes		Piedmont	5	9		no
cheese	Italy	Robiola di serosa	no			0	0		no
cheese	Italy	Robiola La Rustica	no			0	0		no
cheese	Italy	Robiola piemontese classica – Piedmont	no		Piedmont	0	0		no
cheese	Italy	Romita piemontese – Piedmont	no			0	0		no
cheese	Italy	Rosa Camuna	no	mild compact paste cheese made with partially skimmed cow's milk	Lombardy	0	0		no
cheese	Italy	Rosso di lago	no			0	0		no
cheese	Italy	Salignon	no	goats's and/or sheep’ milk cheese, usually smoked	Aosta Valley	0	0		no
cheese	Italy	Salagnun	no			0	0		no
cheese	Italy	Salato	no			0	0		no
cheese	Italy	Salato duro friulano	no		Friuli Venezia Giulia	0	0		no
cheese	Italy	Salato morbido del Friuli	no		Friuli Venezia Giulia	0	0		no
cheese	Italy	Salgnun (Salignun)	no		Lombardy	0	0		no
cheese	Italy	Salondro or Solandro	no		Trentino	0	0		no
cheese	Italy	Salondro di malga	no			0	0		no
cheese	Italy	Salondro magro	no			0	0		no
cheese	Italy	Salva cremasco	yes		Lombardy	0	0		no
cheese	Italy	Santo Stefano d'Aveto	no		Ligury	0	0		no
cheese	Italy	Sappada (cheese)	no		Veneto	0	0		no
cheese	Italy	Saras del Fèn	no		Piedmont	0	0		no
cheese	Italy	Sarasso	no			0	0		no
cheese	Italy	Sarazzu (see Sarasso)	no			0	0		no
cheese	Italy	Sargnon or Serniun	no		Piedmont	0	0		no
cheese	Italy	Sbrinz	no		Lombardy	0	0		no
cheese	Italy	Scacciata	no			0	0		no
cheese	Italy	Scacione (Caprone)	no			0	0		no
cheese	Italy	Smoked scamorza	no			0	0		no
cheese	Italy	Scamorza	no			8	14		yes	Baruzzi et al., 2002		S. macedonicus L. fermentum L. gasseri L. helveticus L.delbrueckii S. bovis S. thermophilus Weissella viridescens.
cheese	Italy	Scamorza calabra	no		Calabria	0	0		no
cheese	Italy	Scamorza di bufala	no		Campania	0	0		no
cheese	Italy	Scamorza molisana	no		Molise	0	0		no
cheese	Italy	Scheggia	no			0	0		no
cheese	Italy	Schiz	no			0	0		no
cheese	Italy	Schlander	no			0	0		no
cheese	Italy	Scuete frante	no		Friuli Venezia Giulia	0	0		no
cheese	Italy	Scuete fumade or Ricotta affumicata	no		Friuli Venezia Giulia	0	0		no
cheese	Italy	Scimuda d'alpe	no		Lombardy	0	0		no
cheese	Italy	Scimudin	no		Lombardy	0	0		no
cheese	Italy	Scimut	no			0	0		no
cheese	Italy	Scodellato	no			0	0		no
cheese	Italy	Secondo sale	no			0	0		no
cheese	Italy	Seras	no		Aosta Valley	0	0		no
cheese	Italy	Seré (see Seras)	no			0	0		no
cheese	Italy	Seirass (see Seras)	no			0	0		no
cheese	Italy	Seirass del Fen (see Seras)	no		Piedmont	0	0		no
cheese	Italy	Seirass del Lausun	no		Piedmont	0	0		no
cheese	Italy	Seirass di latte	no			0	0		no
cheese	Italy	Seirass di siero di pecora	no			0	0		no
cheese	Italy	Seirass stagionato	no			0	0		no
cheese	Italy	Semicotto	no			0	0		no
cheese	Italy	Semicotto caprino	no			0	0		no
cheese	Italy	Semicotto ovino	no			0	0		no
cheese	Italy	Semitenero loiano	no			0	0		no
cheese	Italy	Semuda	no			0	0		no
cheese	Italy	Sigarot	no			0	0		no
cheese	Italy	Sigarot cenese	no			0	0		no
cheese	Italy	Sigarot miele	no			0	0		no
cheese	Italy	Sigarot naturale	no			0	0		no
cheese	Italy	Silandro	no		South Tyrol	0	0		no
cheese	Italy	Silter	yes		Lombardy	87	4		no	Silvettiet al., 2017		Lc. garviae Enterococcus spp. Lb. parabuchneri Lb. paracasei Lb. plantarum Lc. lactis Ln. mesenteroides St. equinus St. thermophilus St. uberis
cheese	Italy									Losio et al., 2015		Enterococcus faecalis Enterococcus durans faecium Lactobacillus curvatus Lactobacillus pantheris Lactobacillus lactis Lactobacillus salivarius Lactobacillus paraplantarum Streptococcus thermophilus Lactococcus garviae Lactobacillus delbrueckii bulgaricus Lactobacillus parabuchneri
cheese	Italy	Silter della Val Camonica	no		Lombardy	0	0		no
cheese	Italy	Shtalp	no			0	0		no
cheese	Italy	Smorzasoel	no			0	0		no
cheese	Italy	Soera (Sola della Valcasotto)	no		Piedmont	0	0		no
cheese	Italy	Sola	no		Piedmont	0	0		no
cheese	Italy	Sola stagionata	no			0	0		no
cheese	Italy	Sora	no			0	0		no
cheese	Italy	Sora di pecora brigasca	no			0	0		no
cheese	Italy	Sora tre latti	no			0	0		no
cheese	Italy	Sot la Trape	no		Friuli Venezia Giulia	0	0		no
cheese	Italy	Sottocenere al tartufo	no			0	0		no
cheese	Italy	Spalèm	no		Lombardy	0	0		no
cheese	Italy	Spessa	no		Trentino	0	0		no
cheese	Italy	Spress	no		Piedmont	0	0		no
cheese	Italy	Spressa delle Giudicarie	yes		Trentino	0	0		no
cheese	Italy	Squacquerone di Romagna DOP	yes		Emilia-Romagna	0	0		no
cheese	Italy	Squarquaglione dei Monti Lepini	no			1	3		no
cheese	Italy	Sta'el	no			0	0		no
cheese	Italy	Stagionato de Vaise	no			0	0		no
cheese	Italy	Stella di mare	no			0	0		no
cheese	Italy	Stelvio or Stilfser	yes			0	0		no
cheese	Italy	Sterzinger	no		South Tyrol	0	0		no
cheese	Italy	Stintino di Luino	no			0	0		no
cheese	Italy	Stracchino	no			0	0		no
cheese	Italy	Stracchino	no			6	15		no
cheese	Italy	Stracchino della Valsassina	no			0	0		no
cheese	Italy	Stracchino di bufala	no			0	0		no
cheese	Italy	Stracchino di Nesso	no			0	0		no
cheese	Italy	Stracchino nostrano di Monte Bronzone	no			0	0		no
cheese	Italy	Stracchino orobico	no			0	0		no
cheese	Italy	Stracchino tipico	no		Lombardy	0	0		no
cheese	Italy	Stracchino toscano	no		Tuscany	0	0		no
cheese	Italy	Stracciata	no			1	1		no
cheese	Italy	Stracciatella di bufala	no			1	3		no
cheese	Italy	Strachet	no		Lombardy	0	0		no
cheese	Italy	Strachitunt	yes		Lombardy	0	0		no
cheese	Italy	Stracòn	no			0	0		no
cheese	Italy	Strica	no			0	0		no
cheese	Italy	Tabor	no		Friuli Venezia Giulia	0	0		no
cheese	Italy	Taburet	no			0	0		no
cheese	Italy	Taleggio	yes		Lombardy, Veneto and Piedmont	13	36		yes	Fontana et al., 2010		Psychrobacter celer Brevibacterium casei Brevibacterium linens Enterococcus faecium Lactobacillus delbrueckii Micrococcus luteus Psychrobacter aquimaris Psychrobacter glacincolaus Staphylococcus equorum Staphylococcus vitulinus Streptococcus thermophilus
cheese	Italy									M. Gobbetti, S. Lowney, E. Smacchi, B. Battistotti, P. Damiani, P.F. Fox. 1998
cheese	Italy	Taleggio bergamasco	no			0	0		no
cheese	Italy	Taleggio mandello lario	no			0	0		no
cheese	Italy	Tella Alto Adige	no		South Tyrol	0	0		no
cheese	Italy	Tendaio	no	semi-soft cows milk cheese		0	0		no
cheese	Italy	Testùn	no		Piedmont	0	0		no
cheese	Italy	Testùn ciuc	no			0	0		no
cheese	Italy	Tipo	no			0	0		no
cheese	Italy	Tipo dolce	no		Lombardy	0	0		no
cheese	Italy	Tipo fresco	no		Piedmont	0	0		no
cheese	Italy	Tipo malga friulano	no		Friuli Venezia Giulia	0	0		no
cheese	Italy	Tipo stagionato	no		Piedmont	0	0		no
cheese	Italy	Tirabuscion	no			0	0		no
cheese	Italy	Tirolese	no		South Tyrol	0	0		no
cheese	Italy	Toblach or Toblacher Stangenkäse	no		South Tyrol	0	0		no
cheese	Italy	Toma	no			2	12		yes	Fortina et al., 2003		S. thermophilus E. durans E. faecalis E. faecium L. garvieae L. lactis subsp. cremoris L. lactis subsp. lactis S. agalactiae S. dysgalactiae S. macedonicus S. suis S. uberis
cheese	Italy	Toma Ajgra	no		Piedmont	0	0		no
cheese	Italy	Toma alpigiana	no			0	0		no
cheese	Italy	Toma of Basilicata	no		Basilicata	0	0		no
cheese	Italy	Toma biellese	no	made with milk from the Pezzata Rossa d’Oropa cattle breed	Piedmont	0	0		no
cheese	Italy	Toma brusca	no		Piedmont	0	0		no
cheese	Italy	Toma del bot	no			0	0		no
cheese	Italy	Toma del lait brusc (or Formag lait brusc)	no	cows’ milk cheese	Piedmont	0	0		no
cheese	Italy	Toma del Maccagno	no	cows’ milk cheese	Piedmont	0	0		no
cheese	Italy	Toma del Mottarone	no			0	0		no
cheese	Italy	Toma del Pastore	no			0	0		no
cheese	Italy	Toma della Valle di Susa	no	cows’ milk cheese	Piedmont	0	0		no
cheese	Italy	Toma della Valle Stura	no		Piedmont	0	0		no
cheese	Italy	Toma della Valsesia	no		Piedmont	0	0		no
cheese	Italy	Toma di Balme	no		Piedmont	0	0		no
cheese	Italy	Toma di Boves	no		Piedmont	0	0		no
cheese	Italy	Toma di capra	no		Piedmont, Lombardy	0	0		no
cheese	Italy	Toma di capra d'alpeggio	no			0	0		no
cheese	Italy	Toma di capra Crava	no			0	0		no
cheese	Italy	Toma di Celle	no		Piedmont	0	0		no
cheese	Italy	Toma di Elva (synonym for Casale de Elva)	no			0	0		no
cheese	Italy	Gressoney Toma	no			0	0		no
cheese	Italy	Toma di Lanzo	no		Piedmont	0	0		no
cheese	Italy	Toma di Mendatica	no			0	0		no
cheese	Italy	Toma ossolana	no		Piedmont	0	0		no
cheese	Italy	Toma ossolana al prunent	no			0	0		no
cheese	Italy	Toma ossolana d'alpeggio	no			0	0		no
cheese	Italy	Toma ossolana di casa	no			0	0		no
cheese	Italy	Toma ovicaprina	no			0	0		no
cheese	Italy	Toma di Pragelato	no		Piedmont	0	0		no
cheese	Italy	Toma di Valgrisenche	no		Aosta Valley	0	0		no
cheese	Italy	Toma lucana	no		Basilicata	0	0		no
cheese	Italy	Toma piemontese	yes			1	6		yes
cheese	Italy	Toma Valle Pelice	no			0	0		no
cheese	Italy	Tombea	no		Lombardy	0	0		no
cheese	Italy	Tometta	no		Piedmont	0	0		no
cheese	Italy	Tometta al barolo	no			0	0		no
cheese	Italy	Tometta di Barge	no			0	0		no
cheese	Italy	Tometta Monte Ciuc	no			0	0		no
cheese	Italy	Tometta Valle Elvo	no			0	0		no
cheese	Italy	Tometto (Tumet)	no			0	0		no
cheese	Italy	Tomini di Bollengo e del Talucco	no		Piedmont	0	0		no
cheese	Italy	Tomino	no		Piedmont	0	0		no
cheese	Italy	Tomino canavesano asciutto	no			0	0		no
cheese	Italy	Tomino canavesano fresco	no			0	0		no
cheese	Italy	Tomino da padella	no			0	0		no
cheese	Italy	Tomino del bec	no			0	0		no
cheese	Italy	Tomino del boscaiolo	no			0	0		no
cheese	Italy	Tomino del bot	no			0	0		no
cheese	Italy	Tomino del mel	no			0	0		no
cheese	Italy	Tomino del Talucco	no			0	0		no
cheese	Italy	Tomino delle Valli Saluzzesi	no			0	0		no
cheese	Italy	Tomino di Andrate	no			0	0		no
cheese	Italy	Tomino di Bosconero	no			0	0		no
cheese	Italy	Tomino di Casalborgone	no			0	0		no
cheese	Italy	Tomino di Rivalta	no			0	0		no
cheese	Italy	Tomino di San Giacomo di Boves	no			0	0		no
cheese	Italy	Tomino di Saronsella (Chivassotto)	no			0	0		no
cheese	Italy	Tomino di Sordevolo	no			0	0		no
cheese	Italy	Tomino di Talucco	no		Piedmont	0	0		no
cheese	Italy	Tomino "Montoso"	no			0	0		no
cheese	Italy	Torta (cheese)	no			0	0		no
cheese	Italy	Torta orobica	no			0	0		no
cheese	Italy	Torta mascarpone	no			0	0		no
cheese	Italy	Toscanello	no			0	0		no
cheese	Italy	Tosela	no		Trentino	0	0		no
cheese	Italy	Tosèla del Primiero	no		Trentino	0	0		no
cheese	Italy	Toumin dal mel	no		Piedmont	0	0		no
cheese	Italy	Tre Valli	no		Friuli Venezia Giulia	0	0		no
cheese	Italy	Treccia	no			0	2		no
cheese	Italy	Treccia dura	no		Basilicata	0	0		no
cheese	Italy	Treccia dei Cerviati e Centaurino	no		Campania	0	0		no
cheese	Italy	Trifulin	no		Piedmont	0	0		no
cheese	Italy	Trizza	no			0	0		no
cheese	Italy	Tronchetto	no			0	0		no
cheese	Italy	Tronchetto alpino	no			0	0		no
cheese	Italy	Tronchetto di capra	no			0	0		no
cheese	Italy	Tronchetto stagionato	no			0	0		no
cheese	Italy	Trugole	no			0	0		no
cheese	Italy	Tuma	no		Piedmont	0	0		no
cheese	Italy	Tuma 'd Trausela	no		Piedmont	0	0		no
cheese	Italy	Tuma di Celle	no			0	0		no
cheese	Italy	Tuma di langa sotto vetro	no			0	0		no
cheese	Italy	Tuma sicula	no			0	0		no
cheese	Italy	Tumazzu	no			0	0		no
cheese	Italy	Tumazzu di pecura ccu pipi	no			0	0		no
cheese	Italy	Tumazzu di piecura	no			0	0		no
cheese	Italy	Tumazzu di vacca	no			0	0		no
cheese	Italy	Tumazzu di vacca ccu pipi	no			0	0		no
cheese	Italy	Tumet di Pralungo	no		Piedmont	0	0		no
cheese	Italy	Tumin	no			0	0		no
cheese	Italy	Tumin del mello	no			0	0		no
cheese	Italy	Tumo de Caso (synonym for Casale de Elva)	no			0	0		no
cheese	Italy	Ubriaco – Veneto	no		Veneto	0	0		no
cheese	Italy	Ubriaco al traminer di capra	no			0	0		no
cheese	Italy	Uova di bufala (See Bocconcini)	no			0	0		no
cheese	Italy	Vaciarin	no			0	0		no
cheese	Italy	Val Brandet	no		Lombardy	0	0		no
cheese	Italy	Valcasotto	no		Piedmont	0	0		no
cheese	Italy	Valle d'Aosta Fromadzo or Vallée d'Aoste Fromadzo	yes		Aosta Valley	0	0		no
cheese	Italy	Valligiano	no			0	0		no
cheese	Italy	Valsevia ubriaca	no			0	0		no
cheese	Italy	Valtellina casera	yes		Lombardy	0	0		no
cheese	Italy	Vastedda	no			0	0		no
cheese	Italy	Vastedda della Valle del Belice	yes			0	0		no
cheese	Italy	Vastedda palermitana	no		Sicily	0	0		no
cheese	Italy	Vézzena	no		Trentino	0	0		no
cheese	Italy	Ziegenkäse (see Algunder Ziegenkäse)	no		South Tyrol	0	0		no
cheese	Italy	Ziger	no		South Tyrol	0	0		no
cheese	Italy	Zigercäse (synonym for Ziger)	no			0	0		no
cheese	Italy	Zighera	no	smoked cheese	Trentino	0	0		no
cheese	Italy	Zincarlin	no			0	0		no
cheese	Italy	Zumelle	no		Veneto	0	0		no
cheese	Italy	Zufi	no	fermented ricotta	Piedmont	0	0		no
cheese	Italy	Zuvi (synonym for Zufi.)	no			0	0		no

## Sheet: Fermented milks
Fermented dairy	country	Product name	PDO	Characteristics	Region	Articles in PubMed	Articles in Scopus	Articles from references or differently found	Articles describing microbiota composition (molecular methods only)	References	Other References	Microbiota composition	References		Microbiota composition
fermented dairy	Country	Product name	PDO	Characteristics	Region	Articles in PubMed	Articles in Scopus	Articles from references or differently found	Articles describing microbiota composition (molecular methods only)	References	Other References	Microbiota composition
fermented milk	Slovakia	acidofilné mlieko			Slovakia	0	0		no
fermented milk	Russia, Ukraine, Belarus	acidophiline			Russia, Ukraine, Belarus	1	3		no
fermented milk	Mongolia	Airag			Mongolia	19	25		yes	Choi 2016		L. helveticus E. durans E. faecalis E. faecium L. diolivorans L. kefiranofaciens L. kefiri
fermented milk										Watanabe 2008		L. helveticus Klu. marxianus L. kefiranofaciens
fermented milk										Baldorj et al., 2003		Lactobacillus delbrueckii subsp. bulgaricus Lactococcus lactis Klu. lactis Saccharomyces cerevisiae Torulaspora delbrueckii
fermented milk										Sun et al.,2010		L. casei L. helveticus L. plantarum
fermented milk										Ganzorig et al., 2016		E. faecalis L. helveticus Enterococcus faecium L. sp. L. casei L. kefiri L. hilgardii L. diolivorans L. paracasei L. acidophilus L. paracasei L. plantarum
fermented milk										Oki et al., 2014		L. helveticus L. kefiranofaciens L. diolivorans L. kefiri L. parakefiri Lactococcus lactis
fermented milk										Myamoto et al., 2010		L. helveticus, Leuc. mesenteroides, Lc. lactis, Klu. marxianus, Lc. raffinolactis, E. faecium/hirae/durans/villorum/ratti, St. thermophilus, L. kefiranofaciens, L. kefiri/buchneri, Leu. citreum, and Leu. Lactis
fermented milk										Uchida et al., 2017		L. helveticus, L. kefiri, S. dairensis, L. paracasei, L. plantarum, L. farciminis, S. cerevisiae, Issachenkia orientalis, Klu. wickerhamii
fermented milk	Hungary	aludttej			Hungary	0	0		no
fermented milk	Hungary	tejföl			Hungary	0	0		no
fermented milk	Kenya	Amabere amaruranu			Kenya	1	3		yes	Nyambane t al., 2014		S. thermophilus C. famata C.humicolus C. krusei/inconspicua C. pelliculosa C. sphaerica Cryptococcus laurentii L. plantarum L. bulgaricus subsp. bulgaricus L. helveticus Leuc. mesenteroides subsp. mesenteroides S. cerevisiae Trichosporon mucoides
fermented milk	South Africa	Amasi			South Africa	28	42		yes	Gran et al., 2003		L. lactis subsp. lactis L. lactis subsp. cremoris L. lactis subsp. lactis biovar diacetylactis Leuc. mesenteroides subsp. cremoris
fermented milk										Beukes et al., 2001		Lactococcus lactis subsp. lactis Leuc. mesenteroides subsp. dextranicum L. plantarum Leuc. citreum L. delbrueckii subp. lactis L. lactis
fermented milk	Zimbabwe	Amasi			Zimbabwe	6	13		no	Gadaga et al., 2000		S. cerevisiae, C. lusitaniae, C. colliculosa, S. dairenensis, Dek. bruxillensis, C. lipolytica, C. tropicalis
fermented milk	Mongolia	Arkhi			Mongolia	0	1		no
fermented milk	Greece	ariani			Greece	3	0		no	Cho et al., 2018		L. plantarum, L. pentosus, L. delbrueckii, L. helveticus and L. paracasei
fermented milk	Algeria	Aoules			Algeria	0	0		no
fermented milk	Ethiopia	Arrera			Ethiopia	1	2		no
fermented milk	Turkic countries	ayran			Turkic countries	19	73		no
fermented milk	Scotland	blaand			Scotland	1	3		no
fermented milk	Mongolia	Bjaslag			Mongolia	0	0		no
fermented milk	Dominican Republic	Boruga			Dominican Republic	20	0		no
fermented milk	Bulgaria	Bulgarian milk			Bulgaria
fermented milk	Japan	calpis			Japan	34	9		no
fermented milk	Iceland	chaas			Iceland	0	1		no
fermented milk	India	Chakka			India	0	3		no
fermented milk	Central Asia	chal			Central Asia	2	17		no
fermented milk	Central Asia	chalap			Central Asia	1	0		no
fermented milk	Zambia	Chibwantu			Zambia	1	1		yes	Schoustra et al., 2013		W. confuse Acetobacter lovaniensis L. delbruekii L. fermentum L. harbinensis/L. casei L. helveticus Leuc. pseudomesenteroides St. macedonicus W. cibaria
fermented milk	Nepal	Churpi			Nepal	6	5		no
fermented milk	Central Asia	qatyq			Central Asia	0	0		no
fermented milk	Central Asia	qurt			Central Asia	0	0		no
fermented milk	Central Asia	suzma			Central Asia	1	1		no
fermented milk	United States	clabber			United States	2	9		no
fermented milk	Indonesia	dadiah			Indonesia	0	1		no
fermented milk	India	dahi			India	50	189		yes	Shangpliang et al., 2018		Lc. lactis, L. helveticus, Acetobacter spp., Gluconobacter spp.
fermented milk										Nahidul-islam et al., 2018		Acinetobacter, Enterobacteriaceae, and Aeromonadaceae. Bifidobacterium, Clostridium, Veillonella, Clavispora lusitaniae
fermented milk										Koirala et al., 2014		L. delbrueckii subsp. bulgaricus, L. paracasei, L. rhamnosus
fermented milk										Mehmood et al., 2009		S. thermophilus, L. bulgaricus, L. acidophilus, L. lactis, L. casei
fermented milk										Harun-Ur-Rashid et al., 2007		S. bovis, L. fermentum, L. delbrueckii ssp. bulgaricus, L. delbrueckii ssp. lactis, L. sp., Ec. faecium, S. thermophilus, Leuc. mesenteroides ssp. mesenteroides, Leuc. mesenteroides ssp. dextranicum, Lc. lactis ssp. lactis, Lc. raffinolactis and P. pentosaceus
fermented milk	Iran	doogh			Iran	34	94		yes	Sayevand et al., 2017		L. acidophilus L. delbrueckii subsp. bulgaricus L. helveticus L. kefiranofaciens L. amylovorus
fermented milk	Ethiopia	ergo			Ethiopia	15	50		no
fermented milk	Sweden	filmjolk			Sweden	3	7		no
fermented milk	Burkina Faso	Fulani			Burkina Faso	2	68		yes	Bayili et al, 2019		Leuc. mesenteroides, Pediococcus pentosaceus, W. paramesenteroides, Lc. lactis, Enterococcus spp., C. parapsilosis, S. cerevisiae
fermented milk	Iran	ghara			Iran	1	1		no
fermented milk	Ethiopia	Ititu			Ethiopia	1	16		no
fermented milk	Mexico	jocoque			Mexico	0	1		no
fermented milk	Poland	Karmidinka			Poland	0	0		no
fermented milk	Denmark	kærnemælk			Denmark	0	0		no
fermented milk	Netherlands	karnemelk (buttermilk)			Netherlands	0	0		no
fermented milk	Iran	kashk			Iran	3	10		no
fermented milk	Turkic countries	kaymak			Turkic countries	1	7		no
fermented milk	Mongolia	huruud			Mongolia	1	1		yes	Wang et al., 2016		Lac. lactis subsp. lactis L. plantarum Leuc. mesenteroides
fermented milk	Turkic countries	kımız			Turkic countries	0	2		no
fermented milk	Macedonia, Serbia, Bosnia and Herzegovina	kiselo mleko			Macedonia, Serbia, Bosnia and Herzegovina	0	0		no
fermented milk	Bulgaria	kiselo mlyako			Bulgaria	0	0		no
fermented milk	Slovenia	kislo mleko			Slovenia	0	0		no
fermented milk	Rwanda	kivuguto			Rwanda	0	1		no
fermented milk	Afghanistan	Krut			Afghanistan	0	0		no
fermented milk	Kenya	kule naoto			Kenya	4	6		yes	Mathara et al, 2004		L. plantarum L.rhamnosus L. acidophilus L. paracasei L. fermentum E. faecium Lc. lactis Leuc. mesenteroides subsp. dextranicum
fermented milk	Central Asia	kumis			Central Asia	9	15		no
fermented milk	Lebanon	Labneh			Lebanon	12	62		No
fermented milk	Zimbabwe	lacto			Zimbabwe	3	5		yes	Feresu et al., 1990		L. helveticus, L. plantarum, L. delbrueckii subsp. lactis, L. casei subsp. casei , L. casei subsp. pseudoplantarum
fermented milk	Brittany	laezh-ribod			Brittany	0	0		no
fermented milk	Sweden	långfil			Sweden	1	3		no
fermented milk	Romania	lapte acru			Romania	0	0		no
fermented milk	Romania	lapte bătut			Romania	0	0		no
fermented milk	India	lassi			India	3	65		no
fermented milk	Italy	latte acido			Italy	13	11		no
fermented milk	Italy	latticello			Italy	0	0		no
fermented milk	Middle East	leben			Middle East	11	22		yes	Samet-bali et al., 2017		Lc. lactis subsp. lactis, Lc. lactis subsp. cremoris, Leuc. mesenteroides, C. krusei, C. tropicalis and C. lusitania
fermented milk	Nicaragua	leche agria (soured milk)			Nicaragua	0	2		no
fermented milk	Jordan	Jamid			Jordan	0	0		no
fermented milk	Lebanon	Jub-jub			Lebanon	0	0		no
fermented milk	Zambia	Mabisi			Zambia	3	4		yes	Schoustra et al., 2013		Lc. lactis L. kefiranofaciens Acetobacter pasteurianus Acinetobacter spp. Chryseobacterium bovis Citrobacter freudii Exiguobacterium indicum L.brevis L. helveticus L. plantarum Leuc. pseudomesenteroides St. equinus St. thermophilus St. Thermophilus
fermented milk	Kurdistan Region	Mastaw			Kurdistan Region	0	0		no
fermented milk	Georgia	matsoni			Georgia	3	6		yes	Quero et al., 2014		S. thermophilus L. delbrueckii subsp. bulgaricus L. helveticus L. paracasei L. lactis
fermented milk										Bokulich et al., 2015		S. thermophilus C. albicans C. famata C. zeylanoides K. lactis K. marxianus L. delbrueckii subsp. bulgaricus L. elongisporus L. helveticus L. paracasei L.lactis S. cerevisiae
fermented milk	Iceland	mattha			Iceland	0	0		no
fermented milk	Armenia	matzoon			Armenia	0	1		no
fermented milk	Kenya	Maziwa Lala			Kenya	0	1		yes	Myamoto et al., 2005		L. plantarum group, W. confusa, Enterococcus sp., Lc. lactis and Pediococcus pentosaceus
fermented milk	Tanzania	Maziwa Mgando			Tanzania	0	0		no
fermented milk	Tanzania	Maziwa Mtindi			Tanzania	0	0		no
fermented milk	Iceland	mishti doi			Iceland	0	5		no
fermented milk	Zambia	Munkoyo			Zambia	2	2		yes	Schoustra et al., 2013		W. cibaria L. delbruekii L. fermentum L. fermentum L. plantarum L. rossiae W. confusa
fermented milk	Kenya	Mursik			Kenya	2	3		no
fermented milk	West africa	Nunu/Nono			West africa	6	19		no	Obi et al., 2007		Staph. aureus, E.coli, Enterobacter aerogenes, B. cereus, P. aeruginosa, L. lactis, S. cerevisiae, G. candidum
fermented milk	Finland	piimä			Finland	1	2		no
fermented milk	Russia, Ukraine, Belarus	prostokvasha			Russia, Ukraine, Belarus	0	2		no
fermented milk	Turkic countries	qatiq			Turkic countries	0	0		no
fermented milk	Russia, Ukraine, Belarus	rjazenka			Russia, Ukraine, Belarus	0	0		no
fermented milk	Sudan	rob			Sudan	23	16		yes	Abdullah et al., 2010		L. delbrucckii, L. fermentum
fermented milk										Abdelgadir et al., 2001		L. fermentum, L. acidophilus, Lc. lactis, and St. Salivarius
fermented milk	Lithuania	rūgpienis			Lithuania	0	0		no
fermented milk	Latvia	rūgušpiens			Latvia	0	0		no
fermented milk	Russia, Ukraine, Belarus	ryazhenka			Russia, Ukraine, Belarus	2	3		no
fermented milk	Romania	sana			Romania	10	13		no
fermented milk	Germany	Sauermilch			Germany	3	5		no
fermented milk	Iceland	shrikhand			Iceland	1	31		no
fermented milk	Iceland	skyr			Iceland	0	5		no
fermented milk	Hungary	Sooms tej			Hungary	0	0		no
fermented milk	Estonia	soured milk			Estonia	26	64		yes	Motato etal., 2017		L. acidophilus group, Lc. lactis, St. infantarius and St. salivarius
fermented milk										Hamza et al., 2009		L. delbreuckii subsp bulgaricus, L. rhamnosus, and L. plantarum, L. casei and L. pentosus, Aerococcus viridians, E. faecium, Enterococcus gallinarum, Lc. lactis subsp lactis, Leuconostoc sp., St. acidominimus and St. bovis.
fermented milk	Kenya	Suusac			Kenya	2	4		yes	Njage et al., 2011		S. cerevisiae, C. inconspicua, Trichosporon mucoides, C. famat, R. mucilaginosa, C. lusitaniae, Cryptococcus laurentii, Cryptococcus albidus, C. guilliermondii, Trichosporon cutaneum
fermented milk									no	Lore et al., 2005		L. curvatus, L. plantarum, L. salivarius, Lc raffinolactis, Leuc mesenteroides subsp. mesenteroides, C. krusei, Geotrichum penicillatum, R. mucilaginosa
fermented milk	Azerbaijan	Syuzma			Azerbaijan	0	0		no
fermented milk	Norway	surmelk			Norway	0	0		no
fermented milk	Mongolia	tarag			Mongolia	6	10		yes	Sun et al.,2014		L. delbrueckii ssp. Bulgaricus L. kefiranofaciens L. helveticus L. casei L. plantarum L. kefiranofaciens Galactomyces Saccharomyces Trichosporon Kluyveromyces Pichia Candida humicolus
fermented milk										Oki et al., 2014		Lactococcus lactis L. fermentum L. helveticus S. thermophilus
fermented milk										Sun et al.,2010		E. durans E. saccharominimus L. casei L. delbrueckii ssp. bulgaricus L. delbrueckii ssp. bulgaricus L. fermentum L. fermentum L. helveticus L. kefiranofaciens L. plantarum Lc. lactis ssp. Lactis P. acidilactici S. thermophilus
fermented milk	Turkey	Torba			Turkey	3	3		no
fermented milk	Russia, Ukraine, Belarus	tvorog			Russia, Ukraine, Belarus	2	3		no
fermented milk	Scandinavia	Taettemelk			Scandinavia	1	0		no
fermented milk	Poland	twaróg			Poland	1	1		no
fermented milk	Burundi	urubu			Burundi	0	1		no
fermented milk	Russia, Ukraine, Belarus	varenets			Russia, Ukraine, Belarus	0	0		no
fermented milk	Finland	viili			Finland	12	20		yes	Kahala et al., 2007		L. lactis subsp. cremoris L. lactis subsp. lactis Leuc. mesenteroides
fermented milk										Wang et al., 2018		Klu. marxianus P. fermentans S. unisporus
fermented milk	Greece	xinogalo			Greece	0	0		no
fermented milk	Denmark	ymer			Denmark	0	4		no
fermented milk	Egypt	Zabady			Egypt	7	13		yes	El-Baradei et al., 2008		St. thermophilus, Lc. garvieae, Lc. raffinolactis, Lc. lactis, Leuc. citreum, L. delbrueckii subsp. bulgaricus, L. johnsonii

## Sheet: List of dairy products
Supplementary Table S1. List of products included in the database
Product name	Dairy product classification
Abaza	cheese
Abbamar	cheese
Abbaye de Belloc	cheese
Abbaye de Tamié	cheese
Abbaye de Timadeuc Cheese	cheese
Abbey Blue Brie	cheese
Abbey Smoked Brie	cheese
Abertam cheese	cheese
Abondance	cheese
Accasciato	cheese
Acceglio	cheese
Acidino	cheese
acidofilné mlieko	fermented milk
acidophiline	fermented milk
Ädelost	cheese
Adobera cheese	cheese
Affidélice	cheese
Aglino	cheese
Agrì di Valtorta	cheese
Ainuzzi	cheese
Airag	fermented milk
Akkawi	cheese
Aladino	cheese
Algunder Bauernkäse Halbfett	cheese
Algunder Ziegenkäse	cheese
Allgäuer Bergkäse	cheese
Allgäuer Emmentaler	cheese
Allgäuer Sennalpkäse	cheese
Almkäse	cheese
Alpeggio di Triora	cheese
Alpepiana	cheese
Alpepiana Macig	cheese
Alpigiana	cheese
Alpkäse	cheese
Altenburger Ziegenkäse	cheese
aludttej	fermented milk
Amabere amaruranu	fermented milk
Amasi	fermented milk
Amatriciano	cheese
Ambra di Talamello	cheese
Ambrosiana	cheese
Anari cheese	cheese
Añejo cheese	cheese
Anevato	cheese
Animaletti di Provola	cheese
Antep	cheese
Anthotyros	cheese
Aoules	fermented milk
Appenzeller	cheese
Ardagh Castle Gjetost	cheese
Ardrahan	cheese
Ardsallagh Hard Goat's Cheese	cheese
Ardsallagh Smoked Cheese	cheese
Ardsallagh Soft Goat's Cheese	cheese
Areesh	cheese
Ariani	fermented milk
Arkhi	fermented milk
Armola	cheese
Arnavut	cheese
Arrera	fermented milk
Arunda	cheese
Asadero cheese	cheese
Aschbacher Magerkäse	cheese
Asiago fresco	cheese
Asiago Montasio	cheese
Asiago pressato	cheese
Asiago stravecchio	cheese
Asìno	cheese
atleet	fermented milk
Aura	cheese
Auricchio	cheese
Autun	cheese
Avalin	cheese
Ayibe	cheese
ayran	fermented milk
Bachensteiner	cheese
Bacio	cheese
Bacio di latte di capra	cheese
Bacio di latte di mucca	cheese
Backstein	cheese
Bagòss	cheese
Baguette laonnaise	cheese
Baladi cheese	cheese
Balaton cheese	cheese
Ballintubber Cheddar with Chives	cheese
Ballyblue	cheese
Ballybrie	cheese
Ballyhooly Blue	cheese
Ballyoak	cheese
Ballyporeen with Mixed Irish Herbs	cheese
Banbury cheese	cheese
Bandel	cheese
Banon	cheese
Baramily	cheese
Baricot	cheese
Basket cheese	cheese
Bastardo del Grappa	cheese
Batzos	cheese
Bauernkäse	cheese
Bay Lough Cheddar	cheese
Bay Lough Cheddar Smoked	cheese
Bay Lough Cheddar Smoked with Garlic & Herbs	cheese
Bay Lough Cheddar With Garlic & Herbs	cheese
Beacon Fell traditional Lancashire cheese	cheese
Beal Handmade Cheddar	cheese
Beal Raw Milk Cheddar	cheese
Beara Blue	cheese
Beaufort	cheese
Beaufort	cheese
Bebé di Sorrento	cheese
Beddo	cheese
Bedura	cheese
Beemster	cheese
Begiunn	cheese
Bel Paese	cheese
Belicino	cheese
Bella Badia	cheese
Bella Lodi	cheese
Bellingham Blue	cheese
Belmonte	cheese
Bergader	cheese
Bergenost	cheese
Bergkäse	cheese
Bernardo	cheese
Berner Alpkäse	cheese
Berner Hobelkäse AOP	cheese
Bettelmatt	cheese
Beyaz peynir	cheese
Bianco verde	cheese
Biancospino	cheese
Bilou	cheese
Bilozhar	cheese
Bitto	cheese
Bitto d'Alpe	cheese
Bitto Valtellina	cheese
Bjaslag	fermented milk
Blå Gotland	cheese
blaand	fermented milk
Bleu Bénédictin	cheese
Bleu d'Aoste	cheese
Bleu d'Auvergne	cheese
Bleu de Bresse	cheese
Bleu de Gex Haut-Jura	cheese
Bleu de Termignon	cheese
Bleu des Causses	cheese
Bleu du Vercors-Sassenage	cheese
Bleuchâtel	cheese
Blu	cheese
Blu Alpi Cozie	cheese
Blu Antico	cheese
Blu del Moncenisio	cheese
Blu del Moncenisio d'alpeggio	cheese
Blu di montagna	cheese
Blu Val Chiusella	cheese
Bluebell Falls Cygnus	cheese
Bluebell Falls Cygnus with Honey	cheese
Bluebell Falls Cygnus with Pepper	cheese
Bluebell Falls Orion	cheese
Bluebell Falls Pegasus	cheese
Bó Rua Farm	cheese
Bocconcini	cheese
Boeren-Leidse met sleutels	cheese
Boerenkaas	cheese
Boilie Cheese Pearls	cheese
Boilie Goats Cheese Pearls	cheese
Bola de Ocosingo	cheese
Bon Grivois	cheese
Bonassai	cheese
Bonchester cheese	cheese
Bonifaz	cheese
Bonrus	cheese
Bormino	cheese
Boruga	fermented milk
Boscatella di Fiavè	cheese
Boschetto al Tartufo	cheese
Bosnian smoked cheese	cheese
Boulette d'Avesnes	cheese
Boursin cheese	cheese
Boves	cheese
Bovški sir	cheese
Boyne Valley Blue	cheese
Bra	cheese
Bra d'alpeggio	cheese
Bra duro	cheese
Bra duro cheese	cheese
Bra tenero	cheese
Brânză	cheese
Brânzǎ de burduf	cheese
Brânză de Suhaia	cheese
Brânză de vaci	cheese
Branzi	cheese
brebiblu	cheese
Brebidor	cheese
Bresciannella	cheese
Bricchetto tartufo	cheese
Brie de Meaux	cheese
Brie de Melun	cheese
Brie Noir	cheese
Brillat-Savarin	cheese
Brillat-Savarin	cheese
Brimsen	cheese
Broccio Passu	cheese
Brocciu	cheese
Brocciu Corse or Brocciu	cheese
Bros	cheese
Brousse du Rove	cheese
Brunost	cheese
Brus Castelmagno	cheese
Brus da latte	cheese
Brus da ricotta	cheese
Bruss di Frabosa	cheese
Brussels cheese	cheese
Bruz	cheese
Bruz d'Murazzan	cheese
Bryndza	cheese
Bryndza Podhalańska	cheese
Bucheron	cheese
Buflona	cheese
Bukovinskyi	cheese
Bulgarian milk	fermented milk
Bulgarian Yogurt	yogurt
Bündner Bergkäse	cheese
Burrata d'Andria	cheese
Burrell	cheese
Burren Gold	cheese
Burrino	cheese
Busa	fermented milk
Busche	cheese
Büsciun da cavra	cheese
Butirro	cheese
Butterkäse	cheese
Butterkäse	cheese
Buxton blue	cheese
Cabécou	cheese
Cabrinu	cheese
Cabriou	cheese
Cachat	cheese
Cacio a forma di limone	cheese
Cacio di fossa	cheese
Cacio di vacca bianca	cheese
Cacio figurato	cheese
Cacio magno	cheese
Cacio magno alle erbe	cheese
Cacio marcetto	cheese
Cacio ubriaco	cheese
Caciocavallo abruzzese	cheese
Caciocavallo affumicato	cheese
Caciocavallo del Monaco	cheese
Caciocavallo di bufala	cheese
Caciocavallo di Castelfranco	cheese
Caciocavallo di Ciminà	cheese
Caciocavallo di Godrano	cheese
Caciocavallo farcito	cheese
Caciocavallo podolico campano	cheese
Caciocavallo podolico picentino	cheese
Caciocavallo pugliese	cheese
Caciocavallo ragusano	cheese
Caciocavallo silano	cheese
Caciocavallo Silano	cheese
Caciocotto	cheese
Caciofiore aquilino	cheese
Cacioforte	cheese
Cacioreale	cheese
Cacioricotta	cheese
Cacioricotta campana	cheese
Cacioricotta di bufala	cheese
Cacioricotta di capra cilentina	cheese
Cacioricotta fresca	cheese
Cacioricotta lucano	cheese
Cacioricotta pugliese	cheese
Caciotta al peperoncino	cheese
Caciotta amiatina	cheese
Caciotta calabra	cheese
Caciotta campana	cheese
Caciotta degli Elimi	cheese
Caciotta dei Monti della Laga	cheese
Caciotta del Fermano	cheese
Caciotta del Monte Lazzarina	cheese
Caciotta del Montefeltro	cheese
Caciotta della Garfagnana	cheese
Caciotta della Lunigiana	cheese
Caciotta della sabina	cheese
Caciotta di Asiago	cheese
Caciotta di Brugnato	cheese
Caciotta di bufala	cheese
Caciotta di bufala pontina	cheese
Caciotta di capra	cheese
Caciotta di latte caprino	cheese
Caciotta di Montemauro	cheese
Caciotta di pecora	cheese
Caciotta genuina romana	cheese
Caciotta Manzone	cheese
Caciotta mista della Tuscia	cheese
Caciotta misto pecora	cheese
Caciotta sarda	cheese
Caciotta senese	cheese
Caciotta toscana	cheese
Caciotta vaccina frentana	cheese
Caciottina	cheese
Caciottina canestrata di Sorrento	cheese
Caciottina di bufala	cheese
Caciottina di bufala di Amaseno	cheese
Caciottina di bufala di Amaseno aromatizzata	cheese
Cacouyard	cheese
Cadolet di capra	cheese
Cafone	cheese
Cahill's Ardagh Wine Cheese	cheese
Cahill's Original Irish Porter Cheese	cheese
Cahill's Whiskey Cheese	cheese
Cais Dubh	cheese
Cais Rua	cheese
Calcagno	cheese
Callebasse	cheese
Callu de cabreddu	cheese
Camasciano	cheese
Cambozola	cheese
Camel milk yogurt	yogurt
Camembert de Normandie	cheese
Çamur	cheese
Cancoillotte	cheese
Canestrato crotonese	cheese
Canestrato d'Aspromonte	cheese
Canestrato di Calabria	cheese
Canestrato di Moliterno Stagionato in Fondaco	cheese
Canestrato from Moliterno	cheese
Canestrato pugliese	cheese
Canestrato sardo	cheese
Canestrato trentino	cheese
Canestrato vacchino	cheese
Cansiglio	cheese
Cantal	cheese
Cappello del Mago	cheese
Capretta	cheese
Capridor	cheese
Caprino a coagulazione lattica	cheese
Caprino a coagulazione presamica	cheese
Caprino al lattice di fico	cheese
Caprino al pepe di Bagnolo	cheese
Caprino bicchierino	cheese
Caprino da grattugia	cheese
Caprino degli Alburni	cheese
Caprino dei Nebrodi	cheese
Caprino dell'Aspromonte	cheese
Caprino della Carnia pasta dura e pasta morbida	cheese
Caprino della Limina	cheese
Caprino della Val Brevenna	cheese
Caprino della Val Vigezzo	cheese
Caprino di Baceno	cheese
Caprino di Cavalese	cheese
Caprino di Demonte	cheese
Caprino di malga delle Alpi Marittime	cheese
Caprino di Montefalcone del Sannio	cheese
Caprino di Rimella	cheese
Caprino di Urbino	cheese
Caprino di Valsassina	cheese
Caprino Francese	cheese
Caprino fresco	cheese
Caprino fresco veneto	cheese
Caprino lattico piemontese	cheese
Caprino lombardo	cheese
Caprino ossolano	cheese
Caprino presamico piemontese	cheese
Caprino sardo	cheese
Caprino spazzacamino	cheese
Caprino stagionato	cheese
Caprino trentino	cheese
Caprino vaccino	cheese
Caprino Valle	cheese
Caprino valsesiano	cheese
Capriola	cheese
Capritilla	cheese
Carboncino	cheese
Carletta	cheese
Carlina	cheese
Carlow Cheese	cheese
Carlow Cheese Flavoured	cheese
Carmasciano	cheese
Carnia	cheese
Carré de l'Est	cheese
Carrigaline	cheese
Carrigaline Beech Smoked	cheese
Carrowholly	cheese
Carrowholly Cheese Flavoured	cheese
Caș	cheese
Casale de Elva	cheese
Casalina	cheese
Casareccio di Gorreto	cheese
Casàt Gardesano	cheese
Casatella	cheese
Casatella Romagnola	cheese
Casatella Trevigiana	cheese
Casatta nostrana di Corteno Golgi	cheese
Cașcaval	cheese
Cașcaval	cheese
Casciotta di Urbino	cheese
Casel Bellunese	cheese
Casera	cheese
Casera Crotto	cheese
Casera giovane Valtellina	cheese
Casera uso monte	cheese
Cashel Blue	cheese
Casieddu di Moliterno	cheese
Casizolu	cheese
Caso conzato	cheese
Caso peruto	cheese
Casolet	cheese
Casolet della Val di Sole	cheese
Casoretta	cheese
Cassatella	cheese
Castel Ariund	cheese
Castelmagno	cheese
Castelo Branco cheese	cheese
Castelrosso	cheese
Casu axedu o Frue	cheese
Casu becciu	cheese
Casu cundhídu	cheese
Casu de cabreddu	cheese
Casu friscu	cheese
Casu marzu	cheese
Casu spiattatu	cheese
Cathare	cheese
Catupiry	cheese
Caucasian Yogurt	yogurt
Cavrin (Cevrin) di Coazze	cheese
Çerkez Füme	cheese
Cesio	cheese
chaas	fermented milk
Chabichou du Poitou	cheese
Chabri stagionato	cheese
Chakka	fermented milk
chal	fermented milk
chalap	fermented milk
Chamois d'or	cheese
Chanco cheese	cheese
Chaource	cheese
Chaource cheese	cheese
Charbonet	cheese
Charkassiye	cheese
Charolais cheese	cheese
Chaubier	cheese
Chaumes	cheese
Chechil	cheese
Cherni Vit	cheese
Cherz	cheese
Chevrotin	cheese
Chhana	cheese
Chibwantu	fermented milk
Chihuahua cheese	cheese
Chimay cheese	cheese
Chloro	cheese
Chubut	cheese
Chulchoill	cheese
Chura kampo	cheese
Chura loenpa	cheese
Churpi	fermented milk
Ciabutin	cheese
Ciambella di Morolo	cheese
Cieddu	fermented milk
Cimbro	cheese
Cingherlino	cheese
Circassian cheese	cheese
Civil	cheese
clabber	fermented milk
Cleire Goats Cheese	cheese
Clonmore Cheese	cheese
Cofanetto	cheese
Çökelek	cheese
Colby cheese	cheese
Colby cheese	cheese
Colby-Jack cheese	cheese
Coleraine cheddar	cheese
Colorado Blackie	cheese
Comelico	cheese
Çömlek	cheese
Comtè	cheese
Conciato romano	cheese
Contrin	cheese
Coolattin Cheddar	cheese
Coolea Cheese	cheese
Cooleeney Farmhouse Cheese	cheese
Corkotta	cheese
Corleggy Goat's Cheese	cheese
Cosacavaddu ibleo	cheese
Costa d'Oro	cheese
Cotija cheese	cheese
Coulommiers	cheese
Coutances	cheese
Cow milk iranian yogurt	yogurt
Cratloe Hills	cheese
Creeny	cheese
Crema del Cuc	cheese
Crema del Friuli	cheese
Crema del Gerrei	cheese
Crema di Fobello capra	cheese
Cremoso cheese	cheese
Creole cream cheese	cheese
Crescenza	cheese
Criollo	cheese
Croghan	cheese
Crottin de Chavignol	cheese
Crottino al tartufo	cheese
Crozier Blue	cheese
Crucolo	cheese
Crutin	cheese
Cuajada	cheese
Cuc	cheese
Cuincir	cheese
Cuor di fassa	cheese
Cuor di Neve	cheese
Cuor di Valle	cheese
Cuoricino pagina	cheese
Cup Cheese	cheese
Cusiè	cheese
D'ora ligure	cheese
dadiah	fermented milk
dahi	fermented milk
Dahi Chhana	cheese
Danablu	cheese
Danbo	cheese
Danish Blue	cheese
Darraghetto di Viareggio	cheese
Daru	cheese
Degli Albanesi	cheese
Del Colle	cheese
Délice de Bourgogne	cheese
Délice du Calvados	cheese
Delizia del Colle	cheese
Desmond	cheese
Devero	cheese
Dil	cheese
Dilliskus	cheese
Djathë i bardhë	cheese
Djathë pice	cheese
Dobbiaco	cheese
Dobrodar	cheese
Dolce Isola misto	cheese
Dolce sardo	cheese
Dolcelatte	cheese
Dolcezza d'Asiago	cheese
Dolomiti	cheese
Domiati	cheese
Donskaya	fermented milk
doogh	fermented milk
Doolin	cheese
Dorset Blue Cheese	cheese
Doux de Montagne	cheese
Dovedale cheese	cheese
Dromana Flavoured	cheese
Drumlin	cheese
Dubliner	cheese
Due latti quadrotta delle Langhe	cheese
Duhallow	cheese
Dunbarra	cheese
Durrus Cheese	cheese
Džiugas	cheese
Écorce de sapin	cheese
Edam	cheese
Édel de Cléron	cheese
Edelpilzkäse	cheese
Edirne	cheese
Emerald	cheese
Emerald Irish Brie	cheese
Emmental de Savoie	cheese
Emmental français est-central	cheese
Emmentaler	cheese
Époisses	cheese
Erborinato di Artavaggio	cheese
Erborinato di capra	cheese
Erborinato di monte	cheese
Erborinato di pecora delle Alpi Cozie	cheese
ergo	fermented milk
Ericino	cheese
Escarun di pecora	cheese
Esrom	cheese
Exmoor Blue Cheese	cheese
Explorateur	cheese
Ezine	cheese
Faisselle	cheese
Falagnone	cheese
Fallone di Gravina	cheese
Farci-Provola	cheese
Farmer cheese	cheese
Fatulì della Val Saviore	cheese
Fédou	cheese
Felciata di Calabria	cheese
Feta	cheese
Feuille de Dreux	cheese
Feuille du Limousin	cheese
Fiacco di capra	cheese
Figou	cheese
filmjolk	fermented milk
Fior	cheese
Fior di campo	cheese
Fior di latte	cheese
Fior di latte laziale	cheese
Fior di monte	cheese
Fiordivalle	cheese
Fiore sardo	cheese
Fiore sicano	cheese
Fioreta ricotta	cheese
Fiorone della Valsassina	cheese
Fiurit ricotta	cheese
Fivemiletown Cheddar Range	cheese
Flors ricotta	cheese
Fodòm	cheese
Fontal	cheese
Fontal Fiavè	cheese
Fontina	cheese
Formadi	cheese
Formadi salat	cheese
Formaella Arachova Parnassos	cheese
Formaggella del Bec	cheese
Formaggella del Luinese	cheese
Formaggella dell'Adamello	cheese
Formaggella della Val Brembana	cheese
Formaggella della Val Camonica	cheese
Formaggella della Val di Sabbia	cheese
Formaggella della Val di Scalve	cheese
Formaggella della Val Seriana	cheese
Formaggella della Val Trompia	cheese
Formaggella di caglio	cheese
Formaggella spazzacamino	cheese
Formaggella tremosine	cheese
Formaggella uso monte	cheese
Formaggella Valcavallina	cheese
Formaggetta della Valle Argentina	cheese
Formaggetta di Bonassola	cheese
Formaggetta di mucca	cheese
Formaggetta di Stella San Giovanni	cheese
Formaggetta savonese	cheese
Formaggina	cheese
Formaggini	cheese
Formaggio a crosta rossa	cheese
Formaggio agordino di malga	cheese
Formaggio Alta Pusteria	cheese
Formaggio Bastardo del Grappa	cheese
Formaggio caprino d'alpeggio	cheese
Formaggio caprino del Cilento	cheese
Formaggio caprino della Limina	cheese
Formaggio coi vermi	cheese
Formaggio d'alpe	cheese
Formaggio d'alpeggio di Triora	cheese
Formaggio dei Zaccuni	cheese
Formaggio del cit	cheese
Formaggio del fieno	cheese
Formaggio del Gleno	cheese
Formaggio del monte	cheese
Formaggio delle Langue o Trifulin	cheese
Formaggio di "caso"	cheese
Formaggio di capra di Calabria	cheese
Formaggio di colostro ovino	cheese
Formaggio di Fossa	cheese
Formaggio di Fossa di Sogliano	cheese
Formaggio di malga dei 7 comuni	cheese
Formaggio di Menconico	cheese
Formaggio di montagna	cheese
Formaggio di montagna di Sesto	cheese
Formaggio di montagna friulano	cheese
Formaggio di S. Stefano di Quisquina	cheese
Formaggio fiore or Fiore sardo	cheese
Formaggio in crema	cheese
Formaggio marcio or casu marzu	cheese
Formaggio pecorino di Atri	cheese
Formaggio Piave	cheese
Formaggio pressato	cheese
Formaggio salato o Asino	cheese
Formaggio saltarello	cheese
Formaggio semigrasso d'alpe	cheese
Formaggio ubriaco	cheese
Formaggio Val Seriana	cheese
Formaggiola caprina	cheese
Formaggiu di capra	cheese
Formai de Livign	cheese
Formai de Mut	cheese
Formai de Mut dell'Alta Valle Brembana	cheese
Formaio embriago	cheese
Formandi frant	cheese
Formatge de l'Alt Urgell i la Cerdanya	cheese
Formatge de la Garrotxa	cheese
Formatge de Maó	cheese
Formatge Mallorquí	cheese
Formazza	cheese
Formella del Friuli	cheese
Foudjou	cheese
Fougerus	cheese
Fourme d'Ambert	cheese
Fourme d’Asco	cheese
Fourme de Cantal	cheese
Fourme de Montbrison	cheese
Frachet	cheese
Fresa	cheese
Frico balacia	cheese
Fromage blanc	cheese
Fromage frais	cheese
Fromager d'Affinois	cheese
Furmaggitt di Montevecchia	cheese
Furmaggiu du quagliu	cheese
Furmai del sieur Mario	cheese
Furmai marçèt	cheese
Fynbo	cheese
Gabriel	cheese
Gailtaler Almkäse	cheese
Gala	cheese
Galotyri	cheese
Gamalost	cheese
Ganja	yogurt
Gaperon	cheese
Garda Tremosine	cheese
Ġbejna	cheese
Geitost	cheese
Gelundener Käse	cheese
ghara	fermented milk
Giacobin de Zena	cheese
Giganti	cheese
Giglio sardo	cheese
Gineprino	cheese
Gingherlino	cheese
Gioda	cheese
Gioddu	fermented milk
Gioddu/Mezzoraddu	fermented milk
Giuncà	cheese
Giuncata	cheese
Gjizë	cheese
Gleann Oir	cheese
Glebe Brethan	cheese
Goat milk iranian yogurt	yogurt
Gorga Ciccarelli Viareggio	cheese
Gorgonzola	cheese
Gorgonzola a due paste	cheese
Gorgonzola aging	cheese
Gorgonzola bresciano	cheese
Gorgonzola con la coda	cheese
Gorgonzola tipo piccante	cheese
Gortnamona	cheese
Gouda	cheese
Goya	cheese
Gräddost	cheese
Gran cacio di Morolo	cheese
Grana calabrese	cheese
Grana Padano	cheese
Grana Trentino	cheese
Grande Vecchio di Montefollonico	cheese
Granone Lodigiano	cheese
Grappino	cheese
Graskaas	cheese
Grasso d'alpe	cheese
Graukäse	cheese
Graukäse della Valle Aurina	cheese
Graviera Agrafon	cheese
Graviera Kritis	cheese
Graviera Naxou	cheese
Gravyer	cheese
Greek yogurt	yogurt
Gresal	cheese
Gressoney Toma	cheese
Grevé	cheese
Groviera La Leonessa	cheese
Gruyère/Greyerzer (AOP)	cheese
Gruzovina	fermented milk
Guayanés cheese	cheese
Gubbeen	cheese
Guttus di pecora grossetano	cheese
Halloumi	cheese
Handkäse	cheese
Harzer	cheese
Havarti	cheese
Hegarty's Cheddar	cheese
Heidal cheese	cheese
Hellim	cheese
Herrgårdsost	cheese
Herve cheese	cheese
Hibernia	cheese
Hirtenkäse	cheese
Hoch Pustertaler	cheese
Höfðingi	cheese
Hohenheim	cheese
Holsteiner Tilsiter	cheese
Homolje cheese	cheese
Hoop cheese	cheese
Humboldt Fog	cheese
huruud	fermented milk
Hushållsost	cheese
Imokilly Regato	cheese
Incavolata	cheese
Ircano	cheese
Irish farmhouse smear	cheese
Istanboly	cheese
Italico	cheese
Ititu	fermented milk
Jameed	cheese
Jamid	fermented milk
Jarlsberg cheese	cheese
Jasperino lombardo	cheese
Jibne Baida	cheese
Jibneh Arabieh	cheese
Jihočeská Niva	cheese
Jihočeská Zlatá Niva	cheese
Jocoque	fermented milk
Jub-jub	fermented milk
Kačkavalj	cheese
Kaçkavall	cheese
kærnemælk	fermented milk
Kalari	cheese
Kalathaki Limnou	cheese
Kanterkaas	cheese
Karaván	cheese
Karish	cheese
Karmidinka	fermented milk
karnemelk (buttermilk)	fermented milk
Kaşar	cheese
kashk	fermented milk
Kashkaval	cheese
Kashkawan	cheese
Kasseri	cheese
Katiki Domokou	cheese
Katyk	fermented milk
kaymak	fermented milk
Keçi peyniri	cheese
Kefalograviera	cheese
Kefalotyri	cheese
Kefir	fermented milk
Kelle Peyniri Balıkesir	cheese
Kerry Blue	cheese
Kiba torinese	cheese
Kilcummin	cheese
Killeen Cow's Cheese	cheese
Killeen Goat's Cheese	cheese
Kirlihanım	cheese
kiselo mleko	fermented milk
kiselo mlyako	fermented milk
kislo mleko	fermented milk
Kissel mleka	fermented milk
kivuguto	fermented milk
kımız	fermented milk
Knockalara Semi-Hard Sheeps Cheese	cheese
Knockalara Sheep's Cheese	cheese
Knockanore Flavoured	cheese
Knockanore Plain	cheese
Knockanore Smoked	cheese
Knockatee Cheddar	cheese
Knockatee Gouda	cheese
Knockdrinna Fresh Goats Log	cheese
Knockdrinna Goat's Brined Cheese	cheese
Knockdrinna Gold	cheese
Knockdrinna Meadow Sheep's Cheese	cheese
Knockdrinna Snow	cheese
Kochkäse	cheese
Kopanisti	cheese
Korall	cheese
Korbáčiky	cheese
Kravská hrudka	cheese
Krivi Vir caciocavallo	cheese
Krut	fermented milk
Küflü	cheese
kule naoto	fermented milk
kumis	fermented milk
Küp	cheese
L'Etivaz (AOP)	cheese
La Res	cheese
La Vache qui Rit	cheese
Laban	fermented milk
Labneh	cheese
Labneh	fermented milk
Lacarian	cheese
lacto	fermented milk
Ladotyri Mytilinis	cheese
laezh-ribod	fermented milk
Lagrein	cheese
Laguiole	cheese
Lait caillé	fermented milk
långfil	fermented milk
Langres	cheese
Lappi	cheese
lapte acru	fermented milk
lapte bătut	fermented milk
lassi	fermented milk
latte acido	fermented milk
Latteria Delebio	cheese
Latteria di Fagagna	cheese
Latteria di Livigno	cheese
lavazza di fromago	cheese
Lavistown	cheese
Lavort	cheese
Le Marechal	cheese
Le Riopelle de l'Isle	cheese
Le Wavreumont	cheese
leben	fermented milk
leche agria (soured milk)	fermented milk
Leerdammer	cheese
Leipäjuusto	cheese
Leyden	cheese
Liederkranz cheese	cheese
Lietuviškas varškės sūris	cheese
Liliputas	cheese
Limburger cheese	cheese
Limburger cheese	cheese
Lingallin	cheese
Liptauer or Körözött	cheese
Liptauer triestino	cheese
Livarot	cheese
Livno cheese	cheese
Llenguat	cheese
Lor	cheese
Lüneberg cheese	cheese
Luzerner Rahmkäse	cheese
Maasdam	cheese
Maaslander	cheese
Mabisi	fermented milk
Macagn	cheese
Maccagno o Toma Maccagno	cheese
Mâconnais	cheese
Madonie Provola	cheese
Maggot cheese	cheese
Magnocca	cheese
Magnùn	cheese
Magro di piatta	cheese
Maighean	cheese
Maioc-Magnocca gordana	cheese
Maiorchino	cheese
Maiorchino di Novara di Sicilia	cheese
Majdoule	cheese
Malaka	cheese
Malga	cheese
Malga altopina o dei Sette Comuni	cheese
Malga bellunese	cheese
Malga Fane	cheese
Malga o Ugovizza	cheese
Malga stagionato nelle vinacce	cheese
Malga Stelvio	cheese
Mamirollais	cheese
Mamirolle	cheese
Manouri	cheese
Manteca	cheese
Manyas	cheese
Mar del Plata	cheese
Maredsous cheese	cheese
Maria provolone di Potenza	cheese
Maribo	cheese
Maroilles	cheese
Marzolino del Chianti	cheese
Marzolino di Lucardo	cheese
Marzolino o Marzolino	cheese
Marzotica ricotta	cheese
Mascarpa	cheese
Mascarpin de la Calza	cheese
Mascarpone	cheese
Mascarpone di bufala	cheese
Mascarpone di bufala di Battipaglia	cheese
Mast	fermented milk
Mastaw	fermented milk
Mastela	cheese
Mató	cheese
Matsoni	fermented milk
Mattha	fermented milk
Mattone or Zeigel	cheese
Mattonella al rosmarino	cheese
Matusc o Magro di latteria	cheese
Matzoon	fermented milk
Maziwa Lala	fermented milk
Maziwa Mgando	fermented milk
Maziwa Mtindi	fermented milk
Metsovone	cheese
Metton	cheese
Mezzapasta	cheese
Mihaliç	cheese
Milbenkäse	cheese
Milleens	cheese
Millefoglie all'aceto balsamico/Marzemino	cheese
Millhouse Sheep's Cheese	cheese
Minas	cheese
Mine-gabhar	cheese
Mish	cheese
Mishti doi	fermented milk
Misto capra	cheese
Misto capra di malga	cheese
Misto pecora fresco dei Berici	cheese
Moesin di Fregona	cheese
Mohant	cheese
Molbo	cheese
Mollana della Val Borbera	cheese
Moncenisio	cheese
Mont Blanc	cheese
Mont d'Or	cheese
Mont des Cats	cheese
Montagna	cheese
Montanello	cheese
Montasio	cheese
Monte Baldo and Monte Baldo primo fiore	cheese
Monte delle Dolomiti	cheese
Monte Veronese	cheese
Monte Veronese di malga	cheese
Monte Veronese ubriaco all'amarone	cheese
Montébore	cheese
Montegranero	cheese
Monterey Jack	cheese
Moonshine Organic Cheese	cheese
Moose cheese	cheese
Morbier	cheese
Morello	cheese
Morlâc	cheese
Morlacco	cheese
Mortaràt	cheese
Mortaràt Ciambella aromatica	cheese
Mortrett (Murtret)	cheese
Mossfield	cheese
Mossfield Flavoured	cheese
Mossfield Mature	cheese
Motelì	cheese
Motta	cheese
Mottin Charentais	cheese
Mottolina	cheese
Mottolino	cheese
Mount Callan Cheddar	cheese
Mousseron	cheese
Mozzarella	cheese
Mozzarella di bufala	cheese
Mozzarella di bufala campana	cheese
Muenster cheese	cheese
Munster	cheese
Murazzano	cheese
Murianengo	cheese
Mursik	fermented milk
Mursin	cheese
Murtarat	cheese
Musulupu	cheese
Mutschli	cheese
Myzithra	cheese
Nabulsi cheese	cheese
Nacho cheese	cheese
Nagelkaas	cheese
Nanoški sir	cheese
Năsal cheese	cheese
natural Goats Log	cheese
Neufchâtel	cheese
Nevegal	cheese
Nguri	cheese
Nieheimer	cheese
Nigerian yogurt	yogurt
Niolo	cheese
Nis	cheese
Nocciolino di ceva	cheese
Nøkkelost	cheese
Non commercial yogurt	yogurt
Noord-Hollandse Edammer	cheese
Noord-Hollandse Gouda	cheese
North Cameroon yogurt	yogurt
Norvegia cheese	cheese
Nostrale d'alpe	cheese
Nostrano	cheese
Nostrano d'alpe	cheese
Nostrano de casèl	cheese
Nostrano del Primiero	cheese
Nostrano della Val di Fassa	cheese
Nostrano di Costalta	cheese
Nostrano di Crodo	cheese
Nostrano di latteria	cheese
Nostrano di malga	cheese
Nostrano di malga trentino	cheese
Nostrano Fiavé	cheese
Nostrano grasso	cheese
Nostrano misto capra	cheese
Nostrano prealpino	cheese
Nostrano semigrasso	cheese
Nostrano Valchiese	cheese
Nostrano Valtrompia	cheese
Nunu/Nono	fermented milk
Nusnetto bresciano	cheese
Oakwood	cheese
Oaxaca cheese	cheese
Oázis	cheese
Obatzda	cheese
Obruk	cheese
Odenwälder Frühstückskäse	cheese
Oka	cheese
Ol Sciur	cheese
Old Irish Creamery Cheddar (with additions)	cheese
Old Irish Creamery Extra Mature White Cheddar	cheese
Old Irish Creamery Smoked Cheddar	cheese
Old MacDonnells Fresh Cow's Cheese	cheese
Old MacDonnells Fresh Goat's Cheese	cheese
Olivet cendré	cheese
Olomoucké syrečky	cheese
Olomoucké tvarůžky	cheese
Oltermanni	cheese
Orchard Cottage Fresh Goat's Cheese	cheese
Orchard Cottage Goat's Cheese in Oil	cheese
Orda	cheese
Örgü	cheese
Orkney Scottish Island Cheddar	cheese
Orla Cheese	cheese
Ormea	cheese
Orrengigo di Pistoia	cheese
Ortler	cheese
Ortolan	cheese
Oscypek	cheese
Ossau-iraty	cheese
Ossolano d'alpe	cheese
Oštiepok	cheese
Ostrica di montagna	cheese
Otlu	cheese
Ovčia hrudka	cheese
Paddaccio	cheese
Paddraccio	cheese
Padduni	cheese
Paddy Jack Cheese	cheese
Paglierina	cheese
Paglierina apassitta	cheese
Paglierina di rifreddo	cheese
Paglietta	cheese
Paglietta delle Langhe	cheese
Paglietta piemontese	cheese
Pakistan yogurt	yogurt
Pallone di Gravina	cheese
Pálpusztai	cheese
Pampanella	cheese
Pancette	cheese
Paneer	cheese
Pannarello	cheese
Pannerone Lodigiano	cheese
Pannónia	cheese
Panquehue	cheese
Parenica	cheese
Parmigiano-Reggiano	cheese
Parrano	cheese
Paški sir	cheese
Passendale cheese	cheese
Pastore	cheese
Pastorella del Cerreto di Sorano	cheese
Pastorino	cheese
Pavin	cheese
Pecora	cheese
Pecoricco	cheese
Pecorini	cheese
Pecorino a crosta fiorita	cheese
Pecorino baccellone	cheese
Pecorino bagnolese	cheese
Pecorino brindisino	cheese
Pecorino crotonese	cheese
Pecorino d'Abruzzo	cheese
Pecorino dei Berici	cheese
Pecorino del Casentino	cheese
Pecorino del Monte Poro	cheese
Pecorino del Parco di Migliarino-San Rossore	cheese
Pecorino della costa apuana	cheese
Pecorino della Garfagnana	cheese
Pecorino della Lunigiana	cheese
Pecorino della Versilia	cheese
Pecorino delle balze volterrane	cheese
Pecorino di Carmasciano	cheese
Pecorino di Farindola	cheese
Pecorino di Filiano	cheese
Pecorino di Garfagnina	cheese
Pecorino di Moliterno	cheese
Pecorino di montagna	cheese
Pecorino di Osilo	cheese
Pecorino di Pian di Vas	cheese
Pecorino di Picinisco	cheese
Pecorino di Pienza stagionato	cheese
Pecorino di Romagna	cheese
Pecorino di Tramonti	cheese
Pecorino fiorone	cheese
Pecorino foggiano	cheese
Pecorino leccese	cheese
Pecorino lucano	cheese
Pecorino marchigiano	cheese
Pecorino Monte Re	cheese
Pecorino Romano	cheese
Pecorino rosso volterrano	cheese
Pecorino sardo	cheese
Pecorino senese	cheese
Pecorino siciliano	cheese
Pecorino stagionato in foglie di noce	cheese
Pecorino subasio	cheese
Pecorino toscano	cheese
Pecorino veneto	cheese
Pélardon	cheese
Pepato	cheese
Pepper jack cheese	cheese
Perail	cheese
Pérassu	cheese
Peretta	cheese
Perlanera	cheese
Pettirosso "Tipo Norcia"	cheese
Piacentinu di Enna	cheese
Piacentinu or Piacentino	cheese
Piattone	cheese
Piave	cheese
Piave Fresco	cheese
Piave Mezzano	cheese
Piave Vecchio	cheese
Piave Vecchio Riserva	cheese
Piave Vecchio Selezione Oro	cheese
Pichtogalo Chanion	cheese
Picodon	cheese
Picón Bejes-Tresviso	cheese
Piddiato	cheese
Pied-de-vent	cheese
Pierino	cheese
piimä	fermented milk
Pikauba	cheese
Pinconning cheese	cheese
Pioda S.Maria	cheese
Piodino	cheese
Piramide	cheese
Piramide di capra	cheese
Piramide in foglia	cheese
Pirittas	cheese
Piscedda	cheese
Poina enfumegada	cheese
Pojna enfumegada	cheese
Pont-l'évêque	cheese
Port Salut	cheese
Pouligny-saint-pierre	cheese
Prästost	cheese
Pratolina	cheese
Prescinseua	cheese
Presolana-Valseriana	cheese
Pressato	cheese
Prima Donna	cheese
Primo sale	cheese
Primolino	cheese
Primusali	cheese
prostokvasha	fermented milk
Provel cheese	cheese
Provola	cheese
Provola affumicata	cheese
Provola affumicata di bufala	cheese
Provola Capizzi	cheese
Provola dei Monti Sicani	cheese
Provola dei Nebrodi	cheese
Provola delle Madonie	cheese
Provola di bufala	cheese
Provola ragusana	cheese
Provola siciliana	cheese
Provola silana	cheese
Provole	cheese
Provolone	cheese
Provolone del Monaco	cheese
Provolone piccante	cheese
Provolone sardo	cheese
Provolone siciliano	cheese
Provolone Valpadana	cheese
Provolone Vernengo	cheese
Provula casale (Floresta)	cheese
Pule cheese	cheese
Pultost	cheese
Pusteria	cheese
Pustertaler	cheese
Puzzone	cheese
Puzzone Bochiotti	cheese
Puzzone di Moena	cheese
Puzzone Vandercaro	cheese
Qatiq	fermented milk
qatyq	fermented milk
Qishta	cheese
Quadro	cheese
Quadro di capra	cheese
Quadro provenzale	cheese
Quagliata ligure	cheese
Quark	cheese
Quartirolo Lombardo	cheese
Queijo Canastra	cheese
Queijo coalho	cheese
Queijo Cobocó	cheese
Queijo de Azeitão	cheese
Queijo de Cabra Transmontano	cheese
Queijo de Colônia	cheese
Queijo de Évora	cheese
Queijo de Nisa	cheese
Queijo do Pico	cheese
Queijo do Serro	cheese
Queijo Manteiga	cheese
Queijo Meia Cura	cheese
Queijo Mestiço de Tolosa	cheese
Queijo prato	cheese
Queijo Rabaçal	cheese
Queijo Serpa	cheese
Queijo Terrincho	cheese
Queijo-do-Reino	cheese
Queijos da Beira Baixa	cheese
Quesaílla	cheese
Quesillo	cheese
Quesito Costeño	cheese
Quesitos de Zuheros	cheese
Queso Arzúa-Ulloa	cheese
Queso blanco	cheese
Queso blanquet	cheese
Queso Cabanillas	cheese
Queso Cabrales	cheese
Queso Camerano	cheese
Queso Campesino	cheese
Queso Casín	cheese
Queso castellano	cheese
Queso Cebreiro	cheese
Queso Chistabín	cheese
Queso Crema	cheese
Queso crineja	cheese
Queso de Acehúche	cheese
Queso de Afuega el pitu	cheese
Queso de Áliva	cheese
Queso de Benabarre	cheese
Queso de Biescas	cheese
Queso de Brez	cheese
Queso de Burgos	cheese
Queso de cazoleta	cheese
Queso de cuajo	cheese
Queso de El Burgo	cheese
Queso de flor	cheese
Queso de Fuente Palmera	cheese
Queso de Gamonedo	cheese
Queso de Gata-Hurdes	cheese
Queso de la Gomera	cheese
Queso de la Nucia	cheese
Queso de La Peral	cheese
Queso de La Serena	cheese
Queso de la Siberia extremeña	cheese
Queso de la Vera	cheese
Queso de Lanzarote	cheese
Queso de las Alpujarras	cheese
Queso de Los Beyos	cheese
Queso de los Pedroches	cheese
Queso de mano	cheese
Queso de Murcia	cheese
Queso de Murcia al vino	cheese
Queso de Oropesa	cheese
Queso de Peñamellera	cheese
Queso de Radiquero	cheese
Queso de Sahún	cheese
Queso de servilleta	cheese
Queso de Tetilla	cheese
Queso de Tronchón	cheese
Queso de Urbiés	cheese
Queso de Valdeón	cheese
Queso del Tiétar	cheese
Queso Echo y Ansó	cheese
Queso Fresco	cheese
Queso herreño	cheese
Queso Ibores	cheese
Queso Idiazábal	cheese
Queso Lesaca	cheese
Queso Llanero	cheese
Queso majorero	cheese
Queso Manchego	cheese
Queso Nata de Cantabria	cheese
Queso Paipa	cheese
Queso palmero	cheese
Queso Palmita	cheese
Queso Panela	cheese
Queso Pañoleta	cheese
Queso Parma de Barinitas	cheese
Queso pata de mulo	cheese
Queso Patamulo	cheese
Queso payoyo	cheese
Queso Pera	cheese
Queso Ribaforada	cheese
Queso Roncal	cheese
Queso San Simón da Costa	cheese
Queso telita	cheese
Queso Torta de Potes	cheese
Queso Tronchón	cheese
Queso Urbasa	cheese
Queso zamorano	cheese
Quesucos de Liébana	cheese
qurt	fermented milk
Raclette	cheese
Raclette	cheese
Raejuusto	cheese
Ragusano	cheese
Raschera	cheese
Raschera d'alpeggio	cheese
Rasco	cheese
Raspadura	cheese
Rauchkäse	cheese
Ravaggiolo romagnolo	cheese
Raveggiolo	cheese
Raviggiolo	cheese
Raviggiolo di pecora	cheese
Raviggiolu	cheese
Reblec de crama	cheese
Réblèque	cheese
Reblo	cheese
Reblò alpino	cheese
Reblo cremoso Valle Susa	cheese
Reblochon	cheese
Reblochon	cheese
Rebruchon	cheese
Red Hawk	cheese
Redykołka	cheese
Regato	cheese
Reggianito	cheese
Remoudou	cheese
Renaico	cheese
Renàz	cheese
Requeijão	cheese
Riavulillo	cheese
Ricotta	cheese
Ricotta affumicata di Mammola	cheese
Ricotta caprina friulana	cheese
Ricotta di bufala	cheese
Ricotta di bufala affumicata	cheese
Ricotta di bufala infornata	cheese
Ricotta di bufala salata	cheese
Ricotta di fuscella	cheese
Ricotta essiccata di bufala	cheese
Ricotta forte	cheese
Ricotta fresca di bufala	cheese
Ricotta gentile	cheese
Ricotta moliterna	cheese
Ricotta mustia	cheese
Ricotta pecorina Monte Re	cheese
Ricotta romana	cheese
Ricotta salata	cheese
Ricotta siciliana	cheese
Ricotta vaccina affumicata ossolana	cheese
Ricottone salato	cheese
Rigatino di Castel San Pietro	cheese
Rigotte de Condrieu	cheese
rjazenka	fermented milk
rob	fermented milk
Roba	fermented milk
Robiola Alta Langa	cheese
Robiola bresciana	cheese
Robiola Cavour	cheese
Robiola contadina	cheese
Robiola d'Alba al tartufo	cheese
Robiola della nonna	cheese
Robiola della Val Bormida	cheese
Robiola della Valsassina	cheese
Robiola delle Langhe	cheese
Robiola di Bossolasco	cheese
Robiola di Castel San Giovanni	cheese
Robiola di Ceva o Mondovì	cheese
Robiola di Cocconato	cheese
Robiola di Intropio	cheese
Robiola di Montevecchia	cheese
Robiola di pecora	cheese
Robiola di Roccaverano	cheese
Robiola di serosa	cheese
Robiola La Rustica	cheese
Robiola piemontese classica	cheese
Rocamadour	cheese
Rochebarron	cheese
Rodoric	cheese
Romadur	cheese
Romita piemontese	cheese
Roomano	cheese
Roquefort	cheese
Rosa Camuna	cheese
Rosso di lago	cheese
Roucoulons	cheese
Roue de Brielove	cheese
Rubing	cheese
rūgpienis	fermented milk
rūgušpiens	fermented milk
Rumi	cheese
Rushan	cheese
ryazhenka	fermented milk
Saga	cheese
Saint Albray	cheese
Saint-André	cheese
Saint-Marcellin	cheese
Saint-nectaire	cheese
Saint-Paulin	cheese
Saint-Rémy	cheese
Sainte-maure-de-touraine	cheese
sakura	cheese
Salagnun	cheese
Salamura	cheese
Salato	cheese
Salato duro friulano	cheese
Salato morbido del Friuli	cheese
Salers	cheese
Salgnun (Salignun)	cheese
Salignon	cheese
Saloio	cheese
Salondro di malga	cheese
Salondro magro	cheese
Salondro or Solandro	cheese
Salva cremasco	cheese
Samsø cheese	cheese
San Michali	cheese
sana	fermented milk
Santarém cheese	cheese
Santo Stefano d'Aveto	cheese
São Jorge	cheese
Sappada (cheese)	cheese
Šar cheese	cheese
Saras del Fèn	cheese
Sarasso	cheese
Sarazzu (see Sarasso)	cheese
Sardo	cheese
Sargnon or Serniun	cheese
Sauermilch	fermented milk
Sayas	cheese
Sbrinz	cheese
Sbrinz	cheese
Scacciata	cheese
Scacione (Caprone)	cheese
Scamorza Altamurana	cheese
Scamorza calabra	cheese
Scamorza di bufala	cheese
Scamorza molisana	cheese
Schabziger	cheese
Scharfe Maxx	cheese
Scheggia	cheese
Schiz	cheese
Schlander	cheese
Scimuda d'alpe	cheese
Scimudin	cheese
Scimut	cheese
Scodellato	cheese
Scuete frante	cheese
Scuete fumade or Ricotta affumicata	cheese
Secondo sale	cheese
Seirass (see Seras)	cheese
Seirass del Fen (see Seras)	cheese
Seirass del Lausun	cheese
Seirass di latte	cheese
Seirass di siero di pecora	cheese
Seirass stagionato	cheese
Selles-sur-cher	cheese
Semicotto	cheese
Semicotto caprino	cheese
Semicotto ovino	cheese
Semitenero loiano	cheese
Semuda	cheese
Ser koryciński swojski	cheese
Seras	cheese
Seré (see Seras)	cheese
Serra da Estrela	cheese
Serrat	cheese
Sfela	cheese
Shandrum	cheese
Sheep milk iranian yogurt	yogurt
Shelal	cheese
Shosim	fermented milk
shrikhand	fermented milk
Shtalp	cheese
Sigarot	cheese
Sigarot cenese	cheese
Sigarot miele	cheese
Sigarot naturale	cheese
Silandro	cheese
Silter	cheese
Silter della Val Camonica	cheese
Single Gloucester	cheese
Sirene	cheese
skyr	fermented milk
Sliced provolone	cheese
Slovenská Bryndza	cheese
Smetankowyi	cheese
Smoked Ardrahan	cheese
Smoked Gubbeen	cheese
Smoked scamorza	cheese
Smorzasoel	cheese
Snøfrisk	cheese
Soera (Sola della Valcasotto)	cheese
Sola	cheese
Sola stagionata	cheese
Sooms tej	fermented milk
Sora	cheese
Sora di pecora brigasca	cheese
Sora tre latti	cheese
Sot la Trape	cheese
Sottocenere al tartufo	cheese
Soumaintrain	cheese
Spalèm	cheese
Sperrin Blue	cheese
Spessa	cheese
Spinosien	cheese
Spress	cheese
Spressa delle Giudicarie	cheese
Spundekäs	cheese
Squacquerone di Romagna DOP	cheese
Squarquaglione dei Monti Lepini	cheese
St Brendan	cheese
St Brendan Brie Mini	cheese
St Brigid	cheese
St Brigid Beag	cheese
St Gall	cheese
St Kevin Brie	cheese
St Killian	cheese
St Tola Divine	cheese
St Tola Hard Goat's	cheese
St Tola Log	cheese
Sta'el	cheese
Staffordshire Cheese	cheese
Stagionato de Vaise	cheese
Stella di mare	cheese
Stelvio or Stilfser	cheese
Sterzinger	cheese
Stilton Cheese	cheese
Stintino di Luino	cheese
Stracchino	cheese
Stracchino della Valsassina	cheese
Stracchino di bufala	cheese
Stracchino di Nesso	cheese
Stracchino nostrano di Monte Bronzone	cheese
Stracchino orobico	cheese
Stracchino tipico	cheese
Stracchino toscano	cheese
Stracciata	cheese
Stracciatella di bufala	cheese
Strachet	cheese
Strachitunt	cheese
Stracòn	cheese
Strica	cheese
String cheese	cheese
Sulguni	cheese
Surke or Shanklish	cheese
surmelk	fermented milk
Súrmjólk	fermented milk
Suusac	fermented milk
suzma	fermented milk
Svecia	cheese
Svrljig caciocavallo	cheese
Swaledale cheese	cheese
Swaledale ewes´ cheese	cheese
Syr	cheese
Syrian cheese	cheese
Syuzma	fermented milk
Tabor	cheese
Taburet	cheese
Taettemelk	fermented milk
Taleggio	cheese
Taleggio bergamasco	cheese
Taleggio mandello lario	cheese
Tandil	cheese
Tara Ban	cheese
tarag	fermented milk
Tarentaise	cheese
Tarho	fermented milk
tejföl	fermented milk
Tekovský salámový syr	cheese
Teleme cheese	cheese
Telemea	cheese
Tella Alto Adige	cheese
Telli	cheese
Tendaio	cheese
Testùn	cheese
Testùn ciuc	cheese
Tête de Moine (AOP)	cheese
Teviotdale Cheese	cheese
The Little Milk Company Brewers Gold	cheese
The Little Milk Company Brie	cheese
The Little Milk Company Mature	cheese
The Little Milk Company Mild	cheese
The Little Milk Company Vintage	cheese
Tilsit cheese	cheese
Tilsiter: "Royalp Tilsit"	cheese
Tipo dolce	cheese
Tipo fresco	cheese
Tipo malga friulano	cheese
Tipo stagionato	cheese
Tipperary Brie	cheese
Tirabuscion	cheese
Tiri tis Possias	cheese
Tiroler Almkäse	cheese
Tiroler Bergkäse	cheese
Tiroler Graukäse	cheese
Tirolese	cheese
Toblach or Toblacher Stangenkäse	cheese
Tolminc	cheese
Toma Ajgra	cheese
Toma alpigiana	cheese
Toma biellese	cheese
Toma brusca	cheese
Toma del bot	cheese
Toma del lait brusc (or Formag lait brusc)	cheese
Toma del Maccagno	cheese
Toma del Mottarone	cheese
Toma del Pastore	cheese
Toma della Valle di Susa	cheese
Toma della Valle Stura	cheese
Toma della Valsesia	cheese
Toma di Balme	cheese
Toma di Boves	cheese
Toma di capra	cheese
Toma di capra Crava	cheese
Toma di capra d'alpeggio	cheese
Toma di Celle	cheese
Toma di Elva (synonym for Casale de Elva)	cheese
Toma di Lanzo	cheese
Toma di Mendatica	cheese
Toma di Pragelato	cheese
Toma di Valgrisenche	cheese
Toma lucana	cheese
Toma of Basilicata	cheese
Toma ossolana	cheese
Toma ossolana al prunent	cheese
Toma ossolana d'alpeggio	cheese
Toma ossolana di casa	cheese
Toma ovicaprina	cheese
Toma piemontese	cheese
Toma Valle Pelice	cheese
Tombea	cheese
Tome des Bauges	cheese
Tometta	cheese
Tometta al barolo	cheese
Tometta di Barge	cheese
Tometta Monte Ciuc	cheese
Tometta Valle Elvo	cheese
Tometto (Tumet)	cheese
Tomini di Bollengo e del Talucco	cheese
Tomino	cheese
Tomino "Montoso"	cheese
Tomino canavesano asciutto	cheese
Tomino canavesano fresco	cheese
Tomino da padella	cheese
Tomino del bec	cheese
Tomino del boscaiolo	cheese
Tomino del bot	cheese
Tomino del mel	cheese
Tomino del Talucco	cheese
Tomino delle Valli Saluzzesi	cheese
Tomino di Andrate	cheese
Tomino di Bosconero	cheese
Tomino di Casalborgone	cheese
Tomino di Rivalta	cheese
Tomino di San Giacomo di Boves	cheese
Tomino di Saronsella (Chivassotto)	cheese
Tomino di Sordevolo	cheese
Tomino di Talucco	cheese
Tomme	cheese
Tomme au Fenouil	cheese
Tomme Boudane	cheese
Tomme Butone	cheese
Tomme de Lévéjac	cheese
Tomme de Savoie	cheese
Tomme des Pyrénées	cheese
Tomme du Jura	cheese
Tomme du Revard	cheese
Tomme Vaudoise	cheese
Torba	fermented milk
Torta (cheese)	cheese
Torta del Casar	cheese
Torta mascarpone	cheese
Torta orobica	cheese
Toscanello	cheese
Tosela	cheese
Tosèla del Primiero	cheese
Tou dels Tillers	cheese
Toucy	cheese
Toumin dal mel	cheese
Tourrier de l'aubier	cheese
Tracle	cheese
Traditional Ayrshire Dunlop	cheese
Traditional Welsh Caerphilly	cheese
Trappista cheese	cheese
Travnik cheese	cheese
Tre Valli	cheese
Treccia	cheese
Treccia dei Cerviati e Centaurino	cheese
Treccia dura	cheese
Trèfle	cheese
Tricorne de Marans	cheese
Trifulin	cheese
Trinqueux	cheese
Triskel Dew Drop	cheese
Triskel Gwenned	cheese
Triskel Pyramid	cheese
Trizza	cheese
Tronchetto	cheese
Tronchetto alpino	cheese
Tronchetto di capra	cheese
Tronchetto stagionato	cheese
Trugole	cheese
Tulum	cheese
Tuma 'd Trausela	cheese
Tuma di Celle	cheese
Tuma di langa sotto vetro	cheese
Tuma sicula	cheese
Tumazzu di pecura ccu pipi	cheese
Tumazzu di piecura	cheese
Tumazzu di vacca	cheese
Tumazzu di vacca ccu pipi	cheese
Tumet di Pralungo	cheese
Tumin	cheese
Tumin del mel	cheese
Tumo de Caso (synonym for Casale de Elva)	cheese
Tupí	cheese
Turkish Labneh	cheese
Tvaroh	cheese
Tvorog	cheese
twaróg	fermented milk
Tybo	cheese
Tyrozouli	cheese
U Muntagnolu	cheese
Ubriaco	cheese
Ubriaco al traminer di capra	cheese
Ukraїnskyi	cheese
Uova di bufala (See Bocconcini)	cheese
Urdă	cheese
Urgotnic	fermented milk
urubu	fermented milk
Vacherin Fribourgeois (AOP)	cheese
Vacherin Mont d'Or	cheese
Vaciarin	cheese
Val Brandet	cheese
Valcasotto	cheese
Valençay	cheese
Valle d'Aosta Fromadzo or Vallée d'Aoste Fromadzo	cheese
Vallé d'Ossau	cheese
Valligiano	cheese
Valsevia ubriaca	cheese
Valtellina casera	cheese
varenets	fermented milk
Vastedda	cheese
Vastedda della Valle del Belice	cheese
Vastedda palermitana	cheese
Västerbottensost	cheese
Velay	cheese
Venaco	cheese
Vesontio	cheese
Vesterhavsost	cheese
Vézzena	cheese
Vieux Samer	cheese
Vieux-Boulogne	cheese
viili	fermented milk
Vlaskaas	cheese
Void	cheese
Vorarlberger Alpkäse	cheese
Vorarlberger Bergkäse	cheese
Vurda	cheese
Wagasi	cheese
Wara	yogurt
Waterford Greek Cheese	cheese
Weißlacker	cheese
West Country farmhouse Cheddar cheese	cheese
Wicklow Baun	cheese
Wicklow Blue	cheese
Wicklow Gold	cheese
Wielkopolski ser smażony	cheese
Wilma's Killorglin Cheese	cheese
Wilma's Killorglin Flavoured Cheese	cheese
Xaintray	cheese
xinogalo	fermented milk
Xygalo Siteias	cheese
Xynomizithra	cheese
Xynotyro	cheese
ymer	fermented milk
Yorkshire Wensleydale	cheese
Zabady	fermented milk
Ziegel	cheese
Ziegenkäse (see Algunder Ziegenkäse)	cheese
Ziger	cheese
Zigercäse (synonym for Ziger)	cheese
Zighera	cheese
Zincarlin	cheese
Zufi	cheese
Zumelle	cheese
Zuvi (synonym for Zufi.)	cheese
